# Supplementary material for: Spectral Signatures of Hydrogen Thioperoxide (HOSH) and Hydrogen Persulfide (HSSH): Possible Molecular Sulfur Sinks in the Dense ISM
Source: MDPI journal article supplement (doi:10.3390/molecules27103200), 2022-05-17
Supplement: s1 [file s1]

# **Supporting Information for: Spectral Signatures of Hydrogen Thioperoxide (HOSH) and Hydrogen Persulfide (HSSH): Possible Molecular Sulfur Sinks in the Dense ISM**

C. Zachary Palmer,<sup>†</sup> Ryan C. Fortenberry,<sup>\*,†</sup> and Josep S. Francisco<sup>‡</sup>

*<sup>†</sup>Department of Chemistry and Biochemistry, University of Mississippi,  
University, Mississippi, United States*

*<sup>‡</sup>Department of Earth and Environmental Sciences, University of Pennsylvania,  
Philadelphia, Pennsylvania, United States*

E-mail: r410@olemiss.edu

**Table S1: Coordinates for Calculating HOSH Dipole Components**

|   | A            | B            | C            |
|---|--------------|--------------|--------------|
| H | -0.842633611 | 0.001714644  | -1.417667570 |
| O | 0.063234434  | -0.011889422 | -1.095489670 |
| S | -0.004570772 | 0.045997723  | 0.565839045  |
| H | -0.015725052 | -1.276059704 | 0.808878993  |

Table S2: The CcCR Force Constants for HOOH

|             |           |             |           |             |           |             |           |
|-------------|-----------|-------------|-----------|-------------|-----------|-------------|-----------|
| $F_{1,1}$   | 0.339640  | $F_{1,2}$   | -0.086915 | $F_{1,3}$   | -0.227477 | $F_{1,4}$   | 0.008298  |
| $F_{1,5}$   | -0.015014 | $F_{1,6}$   | -0.007013 | $F_{1,7}$   | -0.346860 | $F_{1,8}$   | 0.101582  |
| $F_{1,9}$   | 0.233069  | $F_{1,10}$  | -0.001079 | $F_{1,11}$  | 0.000347  | $F_{1,12}$  | 0.001421  |
| $F_{1,13}$  | -0.086915 | $F_{2,1}$   | 0.093007  | $F_{2,2}$   | 0.059326  | $F_{2,3}$   | 0.035081  |
| $F_{2,4}$   | -0.033380 | $F_{2,5}$   | -0.018962 | $F_{2,6}$   | 0.051487  | $F_{2,7}$   | -0.054071 |
| $F_{2,8}$   | -0.037614 | $F_{2,9}$   | 0.000347  | $F_{2,10}$  | -0.005556 | $F_{2,11}$  | -0.002750 |
| $F_{2,12}$  | -0.227477 | $F_{2,13}$  | 0.059326  | $F_{3,1}$   | 0.156259  | $F_{3,2}$   | -0.004265 |
| $F_{3,3}$   | 0.004660  | $F_{3,4}$   | 0.001213  | $F_{3,5}$   | 0.233163  | $F_{3,6}$   | -0.066736 |
| $F_{3,7}$   | -0.158782 | $F_{3,8}$   | -0.001421 | $F_{3,9}$   | 0.002750  | $F_{3,10}$  | 0.001311  |
| $F_{3,11}$  | 0.008298  | $F_{3,12}$  | 0.035081  | $F_{3,13}$  | -0.004265 | $F_{4,1}$   | 0.392539  |
| $F_{4,2}$   | -0.087947 | $F_{4,3}$   | 0.238755  | $F_{4,4}$   | -0.053978 | $F_{4,5}$   | 0.001379  |
| $F_{4,6}$   | -0.001327 | $F_{4,7}$   | -0.346860 | $F_{4,8}$   | 0.051487  | $F_{4,9}$   | -0.233163 |
| $F_{4,10}$  | -0.015014 | $F_{4,11}$  | -0.033380 | $F_{4,12}$  | 0.004660  | $F_{4,13}$  | -0.087947 |
| $F_{5,1}$   | 0.315174  | $F_{5,2}$   | -0.045024 | $F_{5,3}$   | 0.001379  | $F_{5,4}$   | -0.227724 |
| $F_{5,5}$   | -0.026372 | $F_{5,6}$   | 0.101582  | $F_{5,7}$   | -0.054071 | $F_{5,8}$   | 0.066736  |
| $F_{5,9}$   | -0.007013 | $F_{5,10}$  | -0.018962 | $F_{5,11}$  | 0.001213  | $F_{5,12}$  | 0.238755  |
| $F_{5,13}$  | -0.045024 | $F_{6,1}$   | 0.177890  | $F_{6,2}$   | 0.001327  | $F_{6,3}$   | 0.026372  |
| $F_{6,4}$   | -0.020321 | $F_{6,5}$   | -0.233069 | $F_{6,6}$   | 0.037614  | $F_{6,7}$   | -0.158782 |
| $F_{6,8}$   | -0.346860 | $F_{6,9}$   | 0.051487  | $F_{6,10}$  | 0.233163  | $F_{6,11}$  | -0.053978 |
| $F_{6,12}$  | 0.001379  | $F_{6,13}$  | 0.001327  | $F_{7,1}$   | 0.392539  | $F_{7,2}$   | -0.087947 |
| $F_{7,3}$   | -0.238755 | $F_{7,4}$   | 0.008298  | $F_{7,5}$   | 0.035081  | $F_{7,6}$   | 0.004265  |
| $F_{7,7}$   | 0.101582  | $F_{7,8}$   | -0.054071 | $F_{7,9}$   | -0.066736 | $F_{7,10}$  | 0.001379  |
| $F_{7,11}$  | -0.227724 | $F_{7,12}$  | 0.026372  | $F_{7,13}$  | -0.087947 | $F_{8,1}$   | 0.315174  |
| $F_{8,2}$   | 0.045024  | $F_{8,3}$   | -0.015014 | $F_{8,4}$   | -0.033380 | $F_{8,5}$   | -0.004660 |
| $F_{8,6}$   | 0.233069  | $F_{8,7}$   | -0.037614 | $F_{8,8}$   | -0.158782 | $F_{8,9}$   | -0.001327 |
| $F_{8,10}$  | -0.026372 | $F_{8,11}$  | -0.020321 | $F_{8,12}$  | -0.238755 | $F_{8,13}$  | 0.045024  |
| $F_{9,1}$   | 0.177890  | $F_{9,2}$   | 0.007013  | $F_{9,3}$   | 0.018962  | $F_{9,4}$   | 0.001213  |
| $F_{9,5}$   | -0.001079 | $F_{9,6}$   | 0.000347  | $F_{9,7}$   | -0.001421 | $F_{9,8}$   | -0.346860 |
| $F_{9,9}$   | 0.101582  | $F_{9,10}$  | -0.233069 | $F_{9,11}$  | 0.008298  | $F_{9,12}$  | -0.015014 |
| $F_{9,13}$  | 0.007013  | $F_{10,1}$  | 0.339640  | $F_{10,2}$  | -0.086915 | $F_{10,3}$  | 0.227477  |
| $F_{10,4}$  | 0.000347  | $F_{10,5}$  | -0.005556 | $F_{10,6}$  | 0.002750  | $F_{10,7}$  | 0.051487  |
| $F_{10,8}$  | -0.054071 | $F_{10,9}$  | 0.037614  | $F_{10,10}$ | 0.035081  | $F_{10,11}$ | -0.033380 |
| $F_{10,12}$ | 0.018962  | $F_{10,13}$ | -0.086915 | $F_{11,1}$  | 0.093007  | $F_{11,2}$  | -0.059326 |
| $F_{11,3}$  | 0.001421  | $F_{11,4}$  | -0.002750 | $F_{11,5}$  | 0.001311  | $F_{11,6}$  | -0.233163 |
| $F_{11,7}$  | 0.066736  | $F_{11,8}$  | -0.158782 | $F_{11,9}$  | 0.004265  | $F_{11,10}$ | -0.004660 |
| $F_{11,11}$ | 0.001213  | $F_{11,12}$ | 0.227477  | $F_{11,13}$ | -0.059326 | $F_{12,1}$  | 0.156259  |
| $F_{1,1,1}$ | -0.7736   | $F_{1,1,2}$ | 0.3477    | $F_{2,2,2}$ | 0.0480    | $F_{2,2,2}$ | -0.0894   |
| $F_{1,1,3}$ | 0.8345    | $F_{1,2,3}$ | -0.2802   | $F_{2,2,3}$ | -0.0292   | $F_{1,3,3}$ | -0.4433   |
| $F_{2,3,3}$ | 0.1306    | $F_{3,3,3}$ | -0.0095   | $F_{1,1,4}$ | -0.0030   | $F_{1,2,4}$ | -0.0085   |
| $F_{2,2,4}$ | 0.0171    | $F_{1,3,4}$ | 0.0055    | $F_{2,3,4}$ | 0.0265    | $F_{3,3,4}$ | -0.0019   |
| $F_{1,4,4}$ | -0.0011   | $F_{2,4,4}$ | -0.0080   | $F_{3,4,4}$ | 0.0175    | $F_{4,4,4}$ | -0.7921   |
| $F_{1,1,5}$ | 0.0230    | $F_{1,2,5}$ | 0.0002    | $F_{2,2,5}$ | -0.0713   | $F_{1,3,5}$ | -0.0200   |
| $F_{2,3,5}$ | 0.0016    | $F_{3,3,5}$ | 0.0034    | $F_{1,4,5}$ | -0.0098   | $F_{2,4,5}$ | -0.0377   |
| $F_{3,4,5}$ | -0.0034   | $F_{4,4,5}$ | 0.3696    | $F_{1,5,5}$ | 0.0047    | $F_{2,5,5}$ | 0.0844    |
| $F_{3,5,5}$ | 0.0094    | $F_{4,5,5}$ | 0.0188    | $F_{5,5,5}$ | -1.0407   | $F_{1,1,6}$ | 0.0084    |
| $F_{1,2,6}$ | 0.0211    | $F_{2,2,6}$ | -0.0173   | $F_{1,3,6}$ | 0.0017    | $F_{2,3,6}$ | 0.0096    |
| $F_{3,3,6}$ | -0.0064   | $F_{1,4,6}$ | 0.0064    | $F_{2,4,6}$ | -0.0074   | $F_{3,4,6}$ | 0.0065    |
| $F_{4,4,6}$ | -0.8842   | $F_{1,5,6}$ | 0.0015    | $F_{2,5,6}$ | 0.0245    | $F_{3,5,6}$ | -0.0129   |
| $F_{4,5,6}$ | 0.2618    | $F_{5,5,6}$ | -0.0152   | $F_{1,6,6}$ | -0.0132   | $F_{2,6,6}$ | -0.0080   |
| $F_{3,6,6}$ | -0.0095   | $F_{4,6,6}$ | -0.4559   | $F_{5,6,6}$ | 0.2010    | $F_{6,6,6}$ | 0.0572    |
| $F_{1,1,7}$ | 0.7745    | $F_{1,2,7}$ | -0.3390   | $F_{2,2,7}$ | -0.0663   | $F_{1,3,7}$ | -0.8408   |
| $F_{2,3,7}$ | 0.2550    | $F_{3,3,7}$ | 0.4456    | $F_{1,4,7}$ | 0.0013    | $F_{2,4,7}$ | 0.0184    |
| $F_{3,4,7}$ | -0.0234   | $F_{4,4,7}$ | 0.0201    | $F_{1,5,7}$ | -0.0124   | $F_{2,5,7}$ | 0.0387    |
| $F_{3,5,7}$ | 0.0197    | $F_{4,5,7}$ | -0.0103   | $F_{5,5,7}$ | 0.0283    | $F_{1,6,7}$ | -0.0140   |
| $F_{2,6,7}$ | -0.0170   | $F_{3,6,7}$ | -0.0064   | $F_{4,6,7}$ | 0.0234    | $F_{5,6,7}$ | 0.0197    |
| $F_{6,6,7}$ | 0.0121    | $F_{1,7,7}$ | -0.7731   | $F_{2,7,7}$ | 0.3193    | $F_{3,7,7}$ | 0.8658    |
| $F_{4,7,7}$ | -0.0201   | $F_{5,7,7}$ | 0.0422    | $F_{6,7,7}$ | 0.0009    | $F_{7,7,7}$ | 0.7921    |
| $F_{1,1,8}$ | -0.3699   | $F_{1,2,8}$ | -0.0488   | $F_{2,2,8}$ | 0.1622    | $F_{1,3,8}$ | 0.3029    |
| $F_{2,3,8}$ | 0.0330    | $F_{3,3,8}$ | -0.1359   | $F_{1,4,8}$ | 0.0195    | $F_{2,4,8}$ | 0.0214    |
| $F_{3,4,8}$ | -0.0201   | $F_{4,4,8}$ | -0.0422   | $F_{1,5,8}$ | -0.0042   | $F_{2,5,8}$ | -0.0144   |
| $F_{3,5,8}$ | -0.0091   | $F_{4,5,8}$ | 0.0456    | $F_{5,5,8}$ | 0.8099    | $F_{1,6,8}$ | -0.0235   |
| $F_{2,6,8}$ | -0.0126   | $F_{3,6,8}$ | 0.0033    | $F_{4,6,8}$ | -0.0194   | $F_{5,6,8}$ | 0.0091    |
| $F_{6,6,8}$ | -0.0493   | $F_{1,7,8}$ | 0.3495    | $F_{2,7,8}$ | 0.0267    | $F_{3,7,8}$ | -0.2811   |
| $F_{4,7,8}$ | 0.0103    | $F_{5,7,8}$ | -0.0456   | $F_{6,7,8}$ | 0.0227    | $F_{7,7,8}$ | -0.3696   |
| $F_{1,8,8}$ | 0.0518    | $F_{2,8,8}$ | -0.1465   | $F_{3,8,8}$ | -0.0294   | $F_{4,8,8}$ | -0.0283   |
| $F_{5,8,8}$ | -0.8099   | $F_{6,8,8}$ | 0.0351    | $F_{7,8,8}$ | -0.0188   | $F_{8,8,8}$ | 1.0407    |
| $F_{1,1,9}$ | -0.8435   | $F_{1,2,9}$ | 0.2596    | $F_{2,2,9}$ | 0.0447    | $F_{1,3,9}$ | 0.4438    |
| $F_{2,3,9}$ | -0.1410   | $F_{3,3,9}$ | 0.0157    | $F_{1,4,9}$ | -0.0102   | $F_{2,4,9}$ | -0.0255   |
| $F_{3,4,9}$ | -0.0024   | $F_{4,4,9}$ | 0.0009    | $F_{1,5,9}$ | 0.0202    | $F_{2,5,9}$ | -0.0316   |
| $F_{3,5,9}$ | 0.0087    | $F_{4,5,9}$ | 0.0227    | $F_{5,5,9}$ | 0.0351    | $F_{1,6,9}$ | 0.0115    |
| $F_{2,6,9}$ | -0.0027   | $F_{3,6,9}$ | 0.0161    | $F_{4,6,9}$ | 0.0081    | $F_{5,6,9}$ | -0.0547   |
| $F_{6,6,9}$ | -0.0161   | $F_{1,7,9}$ | 0.8545    | $F_{2,7,9}$ | -0.2350   | $F_{3,7,9}$ | -0.4413   |
| $F_{4,7,9}$ | 0.0234    | $F_{5,7,9}$ | -0.0194   | $F_{6,7,9}$ | -0.0081   | $F_{7,7,9}$ | -0.8842   |
| $F_{1,8,9}$ | -0.2831   | $F_{2,8,9}$ | -0.0185   | $F_{3,8,9}$ | 0.1333    | $F_{4,8,9}$ | 0.0197    |

Table S3: The CcCR Force Constants for HOOH

|             |           |             |           |             |           |             |           |             |           |
|-------------|-----------|-------------|-----------|-------------|-----------|-------------|-----------|-------------|-----------|
| $F_{1,1}$   | 0.339642  | $F_{1,2}$   | -0.086915 | $F_{1,3}$   | -0.227477 | $F_{1,4}$   | -0.346861 | $F_{1,5}$   | 0.101584  |
| $F_{1,6}$   | 0.233070  | $F_{1,7}$   | 0.008299  | $F_{1,8}$   | -0.015015 | $F_{1,9}$   | -0.007015 | $F_{1,10}$  | -0.001079 |
| $F_{1,11}$  | 0.000347  | $F_{1,12}$  | 0.001422  | $F_{1,13}$  | -0.086915 | $F_{2,1}$   | 0.093010  | $F_{2,2}$   | 0.059326  |
| $F_{2,3}$   | 0.051486  | $F_{2,4}$   | -0.054071 | $F_{2,5}$   | -0.037612 | $F_{2,6}$   | 0.035082  | $F_{2,7}$   | -0.033382 |
| $F_{2,8}$   | -0.018962 | $F_{2,9}$   | 0.000347  | $F_{2,10}$  | -0.005556 | $F_{2,11}$  | -0.002752 | $F_{2,12}$  | -0.227477 |
| $F_{2,13}$  | 0.059326  | $F_{3,1}$   | 0.156261  | $F_{3,2}$   | 0.233165  | $F_{3,3}$   | -0.066734 | $F_{3,4}$   | -0.158785 |
| $F_{3,5}$   | -0.004265 | $F_{3,6}$   | 0.004657  | $F_{3,7}$   | 0.001212  | $F_{3,8}$   | -0.001422 | $F_{3,9}$   | 0.002752  |
| $F_{3,10}$  | 0.001311  | $F_{3,11}$  | -0.346861 | $F_{3,12}$  | 0.051486  | $F_{3,13}$  | 0.233165  | $F_{4,1}$   | 0.392542  |
| $F_{4,2}$   | -0.087949 | $F_{4,3}$   | -0.238757 | $F_{4,4}$   | -0.053980 | $F_{4,5}$   | 0.001381  | $F_{4,6}$   | 0.001327  |
| $F_{4,7}$   | 0.008299  | $F_{4,8}$   | 0.035082  | $F_{4,9}$   | 0.004265  | $F_{4,10}$  | 0.101584  | $F_{4,11}$  | -0.054071 |
| $F_{4,12}$  | -0.066734 | $F_{4,13}$  | -0.087949 | $F_{5,1}$   | 0.315182  | $F_{5,2}$   | 0.045021  | $F_{5,3}$   | 0.001381  |
| $F_{5,4}$   | -0.227729 | $F_{5,5}$   | 0.026371  | $F_{5,6}$   | -0.015015 | $F_{5,7}$   | -0.033382 | $F_{5,8}$   | -0.004657 |
| $F_{5,9}$   | 0.233070  | $F_{5,10}$  | -0.037612 | $F_{5,11}$  | -0.158785 | $F_{5,12}$  | -0.238757 | $F_{5,13}$  | 0.045021  |
| $F_{6,1}$   | 0.177893  | $F_{6,2}$   | -0.001327 | $F_{6,3}$   | -0.026371 | $F_{6,4}$   | -0.020321 | $F_{6,5}$   | 0.007015  |
| $F_{6,6}$   | 0.018962  | $F_{6,7}$   | 0.001212  | $F_{6,8}$   | 0.008299  | $F_{6,9}$   | 0.035082  | $F_{6,10}$  | -0.004265 |
| $F_{6,11}$  | -0.053980 | $F_{6,12}$  | 0.001381  | $F_{6,13}$  | -0.001327 | $F_{7,1}$   | 0.392542  | $F_{7,2}$   | -0.087949 |
| $F_{7,3}$   | 0.238757  | $F_{7,4}$   | -0.346861 | $F_{7,5}$   | 0.051486  | $F_{7,6}$   | -0.233165 | $F_{7,7}$   | -0.015015 |
| $F_{7,8}$   | -0.033382 | $F_{7,9}$   | 0.004657  | $F_{7,10}$  | 0.001381  | $F_{7,11}$  | -0.227729 | $F_{7,12}$  | -0.026371 |
| $F_{7,13}$  | -0.087949 | $F_{8,1}$   | 0.315182  | $F_{8,2}$   | -0.045021 | $F_{8,3}$   | 0.101584  | $F_{8,4}$   | -0.054071 |
| $F_{8,5}$   | 0.066734  | $F_{8,6}$   | -0.007015 | $F_{8,7}$   | -0.018962 | $F_{8,8}$   | 0.001212  | $F_{8,9}$   | 0.001327  |
| $F_{8,10}$  | 0.026371  | $F_{8,11}$  | -0.020321 | $F_{8,12}$  | 0.238757  | $F_{8,13}$  | -0.045021 | $F_{9,1}$   | 0.177893  |
| $F_{9,2}$   | -0.233070 | $F_{9,3}$   | 0.037612  | $F_{9,4}$   | -0.158785 | $F_{9,5}$   | -0.001079 | $F_{9,6}$   | 0.000347  |
| $F_{9,7}$   | -0.001422 | $F_{9,8}$   | 0.008299  | $F_{9,9}$   | -0.015015 | $F_{9,10}$  | 0.007015  | $F_{9,11}$  | -0.346861 |
| $F_{9,12}$  | 0.101584  | $F_{9,13}$  | -0.233070 | $F_{10,1}$  | 0.339642  | $F_{10,2}$  | -0.086915 | $F_{10,3}$  | 0.227477  |
| $F_{10,4}$  | 0.000347  | $F_{10,5}$  | -0.005556 | $F_{10,6}$  | 0.002752  | $F_{10,7}$  | 0.035082  | $F_{10,8}$  | -0.033382 |
| $F_{10,9}$  | 0.018962  | $F_{10,10}$ | 0.051486  | $F_{10,11}$ | -0.054071 | $F_{10,12}$ | 0.037612  | $F_{10,13}$ | -0.086915 |
| $F_{11,1}$  | 0.093010  | $F_{11,2}$  | -0.059326 | $F_{11,3}$  | 0.001422  | $F_{11,4}$  | -0.002752 | $F_{11,5}$  | 0.001311  |
| $F_{11,6}$  | 0.004265  | $F_{11,7}$  | -0.004657 | $F_{11,8}$  | 0.001212  | $F_{11,9}$  | -0.233165 | $F_{11,10}$ | 0.066734  |
| $F_{11,11}$ | -0.158785 | $F_{11,12}$ | 0.227477  | $F_{11,13}$ | -0.059326 | $F_{12,1}$  | 0.156261  | $F_{1,1,1}$ | -0.7734   |
| $F_{1,1,2}$ | 0.3477    | $F_{1,2,2}$ | 0.0478    | $F_{2,2,2}$ | -0.0895   | $F_{1,1,3}$ | 0.8344    | $F_{1,2,3}$ | -0.2802   |
| $F_{2,2,3}$ | -0.0291   | $F_{1,3,3}$ | -0.4432   | $F_{2,3,3}$ | 0.1306    | $F_{3,3,3}$ | -0.0096   | $F_{1,1,4}$ | 0.7743    |
| $F_{1,2,4}$ | -0.3388   | $F_{2,2,4}$ | -0.0661   | $F_{1,3,4}$ | -0.8407   | $F_{2,3,4}$ | 0.2550    | $F_{3,3,4}$ | 0.4456    |
| $F_{1,4,4}$ | -0.7730   | $F_{2,4,4}$ | 0.3191    | $F_{3,4,4}$ | 0.8656    | $F_{4,4,4}$ | 0.7923    | $F_{1,1,5}$ | -0.3696   |
| $F_{1,2,5}$ | -0.0487   | $F_{2,2,5}$ | 0.1624    | $F_{1,3,5}$ | 0.3028    | $F_{2,3,5}$ | 0.0329    | $F_{3,3,5}$ | -0.1357   |
| $F_{1,4,5}$ | 0.3492    | $F_{2,4,5}$ | 0.0265    | $F_{3,4,5}$ | -0.2810   | $F_{4,4,5}$ | -0.3690   | $F_{1,5,5}$ | 0.0519    |
| $F_{2,5,5}$ | -0.1466   | $F_{3,5,5}$ | -0.0294   | $F_{4,5,5}$ | -0.0189   | $F_{5,5,5}$ | 1.0417    | $F_{1,1,6}$ | -0.8433   |
| $F_{1,2,6}$ | 0.2596    | $F_{2,2,6}$ | 0.0446    | $F_{1,3,6}$ | 0.4437    | $F_{2,3,6}$ | -0.1409   | $F_{3,3,6}$ | 0.0158    |
| $F_{1,4,6}$ | 0.8543    | $F_{2,4,6}$ | -0.2349   | $F_{3,4,6}$ | -0.4413   | $F_{4,4,6}$ | -0.8840   | $F_{1,5,6}$ | -0.2830   |
| $F_{2,5,6}$ | -0.0183   | $F_{3,5,6}$ | 0.1331    | $F_{4,5,6}$ | 0.2617    | $F_{5,5,6}$ | -0.0153   | $F_{1,6,6}$ | -0.4570   |
| $F_{2,6,6}$ | 0.1435    | $F_{3,6,6}$ | -0.0317   | $F_{4,6,6}$ | 0.4559    | $F_{5,6,6}$ | -0.2006   | $F_{6,6,6}$ | 0.0573    |
| $F_{1,1,7}$ | -0.0030   | $F_{1,2,7}$ | -0.0086   | $F_{2,2,7}$ | 0.0171    | $F_{1,3,7}$ | 0.0055    | $F_{2,3,7}$ | 0.0266    |
| $F_{3,3,7}$ | -0.0020   | $F_{1,4,7}$ | 0.0014    | $F_{2,4,7}$ | 0.0186    | $F_{3,4,7}$ | -0.0233   | $F_{4,4,7}$ | -0.0204   |
| $F_{1,5,7}$ | 0.0197    | $F_{2,5,7}$ | 0.0216    | $F_{3,5,7}$ | -0.0200   | $F_{4,5,7}$ | 0.0100    | $F_{5,5,7}$ | -0.0282   |
| $F_{1,6,7}$ | -0.0102   | $F_{2,6,7}$ | -0.0255   | $F_{3,6,7}$ | -0.0023   | $F_{4,6,7}$ | 0.0233    | $F_{5,6,7}$ | 0.0197    |
| $F_{6,6,7}$ | -0.0122   | $F_{1,7,7}$ | -0.0012   | $F_{2,7,7}$ | -0.0081   | $F_{3,7,7}$ | 0.0175    | $F_{4,7,7}$ | 0.0204    |
| $F_{5,7,7}$ | -0.0418   | $F_{6,7,7}$ | 0.0009    | $F_{7,7,7}$ | -0.7923   | $F_{1,1,8}$ | 0.0228    | $F_{1,2,8}$ | 0.0003    |
| $F_{2,2,8}$ | -0.0714   | $F_{1,3,8}$ | -0.0199   | $F_{2,3,8}$ | 0.0016    | $F_{3,3,8}$ | 0.0032    | $F_{1,4,8}$ | -0.0121   |
| $F_{2,4,8}$ | 0.0387    | $F_{3,4,8}$ | 0.0197    | $F_{4,4,8}$ | 0.0418    | $F_{1,5,8}$ | -0.0044   | $F_{2,5,8}$ | -0.0145   |
| $F_{3,5,8}$ | -0.0090   | $F_{4,5,8}$ | -0.0454   | $F_{5,5,8}$ | -0.8105   | $F_{1,6,8}$ | 0.0201    | $F_{2,6,8}$ | -0.0316   |

Table S4: The CcCR Force Constants for HOOH (cont.)

|               |         |               |         |               |         |                |         |                |         |
|---------------|---------|---------------|---------|---------------|---------|----------------|---------|----------------|---------|
| $F_{3,6,8}$   | 0.0090  | $F_{4,6,8}$   | -0.0194 | $F_{5,6,8}$   | 0.0090  | $F_{6,6,8}$    | 0.0490  | $F_{1,7,8}$    | -0.0098 |
| $F_{2,7,8}$   | -0.0378 | $F_{3,7,8}$   | -0.0036 | $F_{4,7,8}$   | -0.0100 | $F_{5,7,8}$    | 0.0454  | $F_{6,7,8}$    | 0.0229  |
| $F_{7,7,8}$   | 0.3690  | $F_{1,8,8}$   | 0.0047  | $F_{2,8,8}$   | 0.0846  | $F_{3,8,8}$    | 0.0094  | $F_{4,8,8}$    | 0.0282  |
| $F_{5,8,8}$   | 0.8105  | $F_{6,8,8}$   | 0.0352  | $F_{7,8,8}$   | 0.0189  | $F_{8,8,8}$    | -1.0417 | $F_{1,1,9}$    | 0.0084  |
| $F_{1,2,9}$   | 0.0212  | $F_{2,2,9}$   | -0.0172 | $F_{1,3,9}$   | 0.0017  | $F_{2,3,9}$    | 0.0097  | $F_{3,3,9}$    | -0.0064 |
| $F_{1,4,9}$   | -0.0140 | $F_{2,4,9}$   | -0.0171 | $F_{3,4,9}$   | -0.0065 | $F_{4,4,9}$    | 0.0009  | $F_{1,5,9}$    | -0.0236 |
| $F_{2,5,9}$   | -0.0126 | $F_{3,5,9}$   | 0.0032  | $F_{4,5,9}$   | 0.0229  | $F_{5,5,9}$    | 0.0352  | $F_{1,6,9}$    | 0.0115  |
| $F_{2,6,9}$   | -0.0027 | $F_{3,6,9}$   | 0.0161  | $F_{4,6,9}$   | -0.0080 | $F_{5,6,9}$    | 0.0548  | $F_{6,6,9}$    | -0.0161 |
| $F_{1,7,9}$   | 0.0064  | $F_{2,7,9}$   | -0.0074 | $F_{3,7,9}$   | 0.0066  | $F_{4,7,9}$    | 0.0233  | $F_{5,7,9}$    | -0.0194 |
| $F_{6,7,9}$   | 0.0080  | $F_{7,7,9}$   | -0.8840 | $F_{1,8,9}$   | 0.0016  | $F_{2,8,9}$    | 0.0245  | $F_{3,8,9}$    | -0.0128 |
| $F_{4,8,9}$   | 0.0197  | $F_{5,8,9}$   | 0.0090  | $F_{6,8,9}$   | -0.0548 | $F_{7,8,9}$    | 0.2617  | $F_{8,8,9}$    | -0.0153 |
| $F_{1,9,9}$   | -0.0132 | $F_{2,9,9}$   | -0.0081 | $F_{3,9,9}$   | -0.0095 | $F_{4,9,9}$    | 0.0122  | $F_{5,9,9}$    | -0.0490 |
| $F_{6,9,9}$   | -0.0161 | $F_{7,9,9}$   | -0.4559 | $F_{8,9,9}$   | 0.2006  | $F_{9,9,9}$    | 0.0573  | $F_{1,1,10}$   | 0.0021  |
| $F_{1,2,10}$  | -0.0002 | $F_{2,2,10}$  | 0.0012  | $F_{1,3,10}$  | 0.0007  | $F_{2,3,10}$   | -0.0013 | $F_{3,3,10}$   | -0.0004 |
| $F_{1,4,10}$  | -0.0027 | $F_{2,4,10}$  | 0.0012  | $F_{3,4,10}$  | -0.0017 | $F_{4,4,10}$   | 0.0012  | $F_{1,5,10}$   | 0.0008  |
| $F_{2,5,10}$  | 0.0006  | $F_{3,5,10}$  | -0.0018 | $F_{4,5,10}$  | 0.0098  | $F_{5,5,10}$   | -0.0047 | $F_{1,6,10}$   | -0.0007 |
| $F_{2,6,10}$  | 0.0008  | $F_{3,6,10}$  | -0.0000 | $F_{4,6,10}$  | 0.0064  | $F_{5,6,10}$   | 0.0016  | $F_{6,6,10}$   | 0.0132  |
| $F_{1,7,10}$  | 0.0027  | $F_{2,7,10}$  | -0.0018 | $F_{3,7,10}$  | 0.0004  | $F_{4,7,10}$   | -0.0014 | $F_{5,7,10}$   | 0.0121  |
| $F_{6,7,10}$  | -0.0140 | $F_{7,7,10}$  | 0.7730  | $F_{1,8,10}$  | -0.0008 | $F_{2,8,10}$   | -0.0012 | $F_{3,8,10}$   | 0.0038  |
| $F_{4,8,10}$  | -0.0197 | $F_{5,8,10}$  | 0.0044  | $F_{6,8,10}$  | -0.0236 | $F_{7,8,10}$   | -0.3492 | $F_{8,8,10}$   | -0.0519 |
| $F_{1,9,10}$  | -0.0007 | $F_{2,9,10}$  | 0.0032  | $F_{3,9,10}$  | -0.0018 | $F_{4,9,10}$   | -0.0102 | $F_{5,9,10}$   | 0.0201  |
| $F_{6,9,10}$  | -0.0115 | $F_{7,9,10}$  | 0.8543  | $F_{8,9,10}$  | -0.2830 | $F_{9,9,10}$   | 0.4570  | $F_{1,10,10}$  | -0.0021 |
| $F_{2,10,10}$ | 0.0008  | $F_{3,10,10}$ | 0.0006  | $F_{4,10,10}$ | 0.0030  | $F_{5,10,10}$  | -0.0228 | $F_{6,10,10}$  | 0.0084  |
| $F_{7,10,10}$ | -0.7743 | $F_{8,10,10}$ | 0.3696  | $F_{9,10,10}$ | -0.8433 | $F_{10,10,10}$ | 0.7734  | $F_{1,1,11}$   | -0.0008 |
| $F_{1,2,11}$  | 0.0006  | $F_{2,2,11}$  | -0.0015 | $F_{1,3,11}$  | -0.0027 | $F_{2,3,11}$   | -0.0053 | $F_{3,3,11}$   | 0.0019  |
| $F_{1,4,11}$  | 0.0018  | $F_{2,4,11}$  | 0.0009  | $F_{3,4,11}$  | 0.0063  | $F_{4,4,11}$   | 0.0081  | $F_{1,5,11}$   | 0.0012  |
| $F_{2,5,11}$  | -0.0013 | $F_{3,5,11}$  | 0.0055  | $F_{4,5,11}$  | 0.0378  | $F_{5,5,11}$   | -0.0846 | $F_{1,6,11}$   | 0.0032  |
| $F_{2,6,11}$  | 0.0053  | $F_{3,6,11}$  | -0.0011 | $F_{4,6,11}$  | -0.0074 | $F_{5,6,11}$   | 0.0245  | $F_{6,6,11}$   | 0.0081  |
| $F_{1,7,11}$  | -0.0012 | $F_{2,7,11}$  | -0.0009 | $F_{3,7,11}$  | -0.0030 | $F_{4,7,11}$   | -0.0186 | $F_{5,7,11}$   | -0.0387 |
| $F_{6,7,11}$  | -0.0171 | $F_{7,7,11}$  | -0.3191 | $F_{1,8,11}$  | -0.0006 | $F_{2,8,11}$   | 0.0013  | $F_{3,8,11}$   | -0.0020 |
| $F_{4,8,11}$  | -0.0216 | $F_{5,8,11}$  | 0.0145  | $F_{6,8,11}$  | -0.0126 | $F_{7,8,11}$   | -0.0265 | $F_{8,8,11}$   | 0.1466  |
| $F_{1,9,11}$  | 0.0008  | $F_{2,9,11}$  | 0.0053  | $F_{3,9,11}$  | -0.0001 | $F_{4,9,11}$   | -0.0255 | $F_{5,9,11}$   | -0.0316 |
| $F_{6,9,11}$  | 0.0027  | $F_{7,9,11}$  | -0.2349 | $F_{8,9,11}$  | -0.0183 | $F_{9,9,11}$   | -0.1435 | $F_{1,10,11}$  | 0.0002  |
| $F_{2,10,11}$ | -0.0006 | $F_{3,10,11}$ | -0.0006 | $F_{4,10,11}$ | 0.0086  | $F_{5,10,11}$  | -0.0003 | $F_{6,10,11}$  | 0.0212  |
| $F_{7,10,11}$ | 0.3388  | $F_{8,10,11}$ | 0.0487  | $F_{9,10,11}$ | 0.2596  | $F_{10,10,11}$ | -0.3477 | $F_{1,11,11}$  | -0.0012 |
| $F_{2,11,11}$ | 0.0015  | $F_{3,11,11}$ | 0.0018  | $F_{4,11,11}$ | -0.0171 | $F_{5,11,11}$  | 0.0714  | $F_{6,11,11}$  | -0.0172 |
| $F_{7,11,11}$ | 0.0661  | $F_{8,11,11}$ | -0.1624 | $F_{9,11,11}$ | 0.0446  | $F_{10,11,11}$ | -0.0478 | $F_{11,11,11}$ | 0.0895  |
| $F_{1,1,12}$  | 0.0006  | $F_{1,2,12}$  | -0.0006 | $F_{2,2,12}$  | 0.0018  | $F_{1,3,12}$   | -0.0022 | $F_{2,3,12}$   | 0.0007  |
| $F_{3,3,12}$  | 0.0002  | $F_{1,4,12}$  | 0.0004  | $F_{2,4,12}$  | -0.0030 | $F_{3,4,12}$   | 0.0022  | $F_{4,4,12}$   | 0.0175  |
| $F_{1,5,12}$  | 0.0038  | $F_{2,5,12}$  | -0.0020 | $F_{3,5,12}$  | -0.0006 | $F_{4,5,12}$   | -0.0036 | $F_{5,5,12}$   | 0.0094  |
| $F_{1,6,12}$  | 0.0018  | $F_{2,6,12}$  | 0.0001  | $F_{3,6,12}$  | -0.0002 | $F_{4,6,12}$   | -0.0066 | $F_{5,6,12}$   | 0.0128  |
| $F_{6,6,12}$  | -0.0095 | $F_{1,7,12}$  | -0.0017 | $F_{2,7,12}$  | 0.0063  | $F_{3,7,12}$   | -0.0022 | $F_{4,7,12}$   | -0.0233 |
| $F_{5,7,12}$  | 0.0197  | $F_{6,7,12}$  | 0.0065  | $F_{7,7,12}$  | 0.8656  | $F_{1,8,12}$   | -0.0018 | $F_{2,8,12}$   | 0.0055  |
| $F_{3,8,12}$  | 0.0006  | $F_{4,8,12}$  | -0.0200 | $F_{5,8,12}$  | -0.0090 | $F_{6,8,12}$   | -0.0032 | $F_{7,8,12}$   | -0.2810 |
| $F_{8,8,12}$  | -0.0294 | $F_{1,9,12}$  | 0.0000  | $F_{2,9,12}$  | 0.0011  | $F_{3,9,12}$   | -0.0002 | $F_{4,9,12}$   | 0.0023  |
| $F_{5,9,12}$  | -0.0090 | $F_{6,9,12}$  | 0.0161  | $F_{7,9,12}$  | 0.4413  | $F_{8,9,12}$   | -0.1331 | $F_{9,9,12}$   | -0.0317 |
| $F_{1,10,12}$ | 0.0007  | $F_{2,10,12}$ | -0.0027 | $F_{3,10,12}$ | 0.0022  | $F_{4,10,12}$  | 0.0055  | $F_{5,10,12}$  | -0.0199 |
| $F_{6,10,12}$ | -0.0017 | $F_{7,10,12}$ | -0.8407 | $F_{8,10,12}$ | 0.3028  | $F_{9,10,12}$  | -0.4437 | $F_{10,10,12}$ | 0.8344  |
| $F_{1,11,12}$ | -0.0013 | $F_{2,11,12}$ | -0.0053 | $F_{3,11,12}$ | -0.0007 | $F_{4,11,12}$  | 0.0266  | $F_{5,11,12}$  | 0.0016  |

Table S5: The CcCR Force Constants for HOOH (cont.)

|                |         |                |         |                |         |               |        |                |         |
|----------------|---------|----------------|---------|----------------|---------|---------------|--------|----------------|---------|
| $F_{6,11,12}$  | -0.0097 | $F_{7,11,12}$  | 0.2550  | $F_{8,11,12}$  | 0.0329  | $F_{9,11,12}$ | 0.1409 | $F_{10,11,12}$ | -0.2802 |
| $F_{11,11,12}$ | -0.0291 | $F_{1,12,12}$  | 0.0004  | $F_{2,12,12}$  | -0.0019 | $F_{3,12,12}$ | 0.0002 | $F_{4,12,12}$  | 0.0020  |
| $F_{5,12,12}$  | -0.0032 | $F_{6,12,12}$  | -0.0064 | $F_{7,12,12}$  | -0.4456 | $F_{8,12,12}$ | 0.1357 | $F_{9,12,12}$  | 0.0158  |
| $F_{10,12,12}$ | 0.4432  | $F_{11,12,12}$ | -0.1306 | $F_{12,12,12}$ | -0.0096 | $F_{1,1,1,1}$ | 0.80   | $F_{1,1,1,2}$  | -0.97   |
| $F_{1,1,2,2}$  | -0.34   | $F_{1,2,2,2}$  | 0.59    | $F_{2,2,2,2}$  | -0.11   | $F_{1,1,1,3}$ | -2.25  | $F_{1,1,2,3}$  | 1.04    |
| $F_{1,2,2,3}$  | 0.25    | $F_{2,2,2,3}$  | -0.40   | $F_{1,1,3,3}$  | 1.60    | $F_{1,2,3,3}$ | -0.56  | $F_{2,2,3,3}$  | -0.13   |
| $F_{1,3,3,3}$  | 0.06    | $F_{2,3,3,3}$  | -0.01   | $F_{3,3,3,3}$  | -0.95   | $F_{1,1,1,4}$ | -0.80  | $F_{1,1,2,4}$  | 0.98    |
| $F_{1,2,2,4}$  | 0.35    | $F_{2,2,2,4}$  | -0.57   | $F_{1,1,3,4}$  | 2.27    | $F_{1,2,3,4}$ | -1.02  | $F_{2,2,3,4}$  | -0.27   |
| $F_{1,3,3,4}$  | -1.62   | $F_{2,3,3,4}$  | 0.55    | $F_{3,3,3,4}$  | -0.06   | $F_{1,1,4,4}$ | 0.78   | $F_{1,2,4,4}$  | -1.01   |
| $F_{2,2,4,4}$  | -0.42   | $F_{1,3,4,4}$  | -2.29   | $F_{2,3,4,4}$  | 1.01    | $F_{3,3,4,4}$ | 1.63   | $F_{1,4,4,4}$  | -0.74   |
| $F_{2,4,4,4}$  | 1.09    | $F_{3,4,4,4}$  | 2.33    | $F_{4,4,4,4}$  | 0.66    | $F_{1,1,1,5}$ | 0.95   | $F_{1,1,2,5}$  | 0.32    |
| $F_{1,2,2,5}$  | -0.67   | $F_{2,2,2,5}$  | 0.18    | $F_{1,1,3,5}$  | -1.06   | $F_{1,2,3,5}$ | -0.25  | $F_{2,2,3,5}$  | 0.46    |
| $F_{1,3,3,5}$  | 0.55    | $F_{2,3,3,5}$  | 0.13    | $F_{3,3,3,5}$  | 0.04    | $F_{1,1,4,5}$ | -0.95  | $F_{1,2,4,5}$  | -0.33   |
| $F_{2,2,4,5}$  | 0.62    | $F_{1,3,4,5}$  | 1.04    | $F_{2,3,4,5}$  | 0.24    | $F_{3,3,4,5}$ | -0.55  | $F_{1,4,4,5}$  | 0.97    |
| $F_{2,4,4,5}$  | 0.35    | $F_{3,4,4,5}$  | -1.01   | $F_{4,4,4,5}$  | -1.03   | $F_{1,1,5,5}$ | -0.36  | $F_{1,2,5,5}$  | 0.71    |
| $F_{2,2,5,5}$  | -0.18   | $F_{1,3,5,5}$  | 0.28    | $F_{2,3,5,5}$  | -0.49   | $F_{3,3,5,5}$ | -0.16  | $F_{1,4,5,5}$  | 0.34    |
| $F_{2,4,5,5}$  | -0.69   | $F_{3,4,5,5}$  | -0.26   | $F_{4,4,5,5}$  | -0.64   | $F_{1,5,5,5}$ | -0.81  | $F_{2,5,5,5}$  | 0.23    |
| $F_{3,5,5,5}$  | 0.58    | $F_{4,5,5,5}$  | 0.93    | $F_{5,5,5,5}$  | 2.02    | $F_{1,1,1,6}$ | 2.27   | $F_{1,1,2,6}$  | -1.02   |
| $F_{1,2,2,6}$  | -0.28   | $F_{2,2,2,6}$  | 0.40    | $F_{1,1,3,6}$  | -1.61   | $F_{1,2,3,6}$ | 0.56   | $F_{2,2,3,6}$  | 0.14    |
| $F_{1,3,3,6}$  | -0.07   | $F_{2,3,3,6}$  | -0.02   | $F_{3,3,3,6}$  | 0.96    | $F_{1,1,4,6}$ | -2.28  | $F_{1,2,4,6}$  | 1.00    |
| $F_{2,2,4,6}$  | 0.30    | $F_{1,3,4,6}$  | 1.63    | $F_{2,3,4,6}$  | -0.56   | $F_{3,3,4,6}$ | 0.09   | $F_{1,4,4,6}$  | 2.30    |
| $F_{2,4,4,6}$  | -1.00   | $F_{3,4,4,6}$  | -1.65   | $F_{4,4,4,6}$  | -2.33   | $F_{1,1,5,6}$ | 1.03   | $F_{1,2,5,6}$  | 0.25    |
| $F_{2,2,5,6}$  | -0.43   | $F_{1,3,5,6}$  | -0.55   | $F_{2,3,5,6}$  | -0.15   | $F_{3,3,5,6}$ | -0.02  | $F_{1,4,5,6}$  | -1.01   |
| $F_{2,4,5,6}$  | -0.24   | $F_{3,4,5,6}$  | 0.56    | $F_{4,4,5,6}$  | 0.99    | $F_{1,5,5,6}$ | -0.27  | $F_{2,5,5,6}$  | 0.49    |
| $F_{3,5,5,6}$  | 0.15    | $F_{4,5,5,6}$  | 0.25    | $F_{5,5,5,6}$  | -0.65   | $F_{1,1,6,6}$ | 1.64   | $F_{1,2,6,6}$  | -0.57   |
| $F_{2,2,6,6}$  | -0.18   | $F_{1,3,6,6}$  | 0.07    | $F_{2,3,6,6}$  | 0.05    | $F_{3,3,6,6}$ | -0.97  | $F_{1,4,6,6}$  | -1.66   |
| $F_{2,4,6,6}$  | 0.58    | $F_{3,4,6,6}$  | -0.12   | $F_{4,4,6,6}$  | 1.68    | $F_{1,5,6,6}$ | 0.55   | $F_{2,5,6,6}$  | 0.17    |
| $F_{3,5,6,6}$  | -0.03   | $F_{4,5,6,6}$  | -0.57   | $F_{5,5,6,6}$  | -0.51   | $F_{1,6,6,6}$ | -0.09  | $F_{2,6,6,6}$  | -0.13   |
| $F_{3,6,6,6}$  | 0.99    | $F_{4,6,6,6}$  | 0.16    | $F_{5,6,6,6}$  | 0.14    | $F_{6,6,6,6}$ | -0.99  | $F_{1,1,1,7}$  | -0.00   |
| $F_{1,1,2,7}$  | -0.02   | $F_{1,2,2,7}$  | -0.02   | $F_{2,2,2,7}$  | -0.03   | $F_{1,1,3,7}$ | -0.01  | $F_{1,2,3,7}$  | -0.02   |
| $F_{2,2,3,7}$  | 0.03    | $F_{1,3,3,7}$  | 0.01    | $F_{2,3,3,7}$  | 0.01    | $F_{3,3,3,7}$ | 0.00   | $F_{1,1,4,7}$  | 0.01    |
| $F_{1,2,4,7}$  | 0.02    | $F_{2,2,4,7}$  | 0.06    | $F_{1,3,4,7}$  | 0.03    | $F_{2,3,4,7}$ | 0.01   | $F_{3,3,4,7}$  | -0.02   |
| $F_{1,4,4,7}$  | -0.03   | $F_{2,4,4,7}$  | -0.08   | $F_{3,4,4,7}$  | -0.04   | $F_{4,4,4,7}$ | 0.09   | $F_{1,1,5,7}$  | 0.01    |
| $F_{1,2,5,7}$  | 0.01    | $F_{2,2,5,7}$  | 0.05    | $F_{1,3,5,7}$  | 0.01    | $F_{2,3,5,7}$ | 0.00   | $F_{3,3,5,7}$  | -0.01   |
| $F_{1,4,5,7}$  | -0.02   | $F_{2,4,5,7}$  | -0.02   | $F_{3,4,5,7}$  | -0.02   | $F_{4,4,5,7}$ | 0.05   | $F_{1,5,5,7}$  | 0.02    |
| $F_{2,5,5,7}$  | -0.03   | $F_{3,5,5,7}$  | -0.01   | $F_{4,5,5,7}$  | 0.27    | $F_{5,5,5,7}$ | -0.18  | $F_{1,1,6,7}$  | 0.01    |
| $F_{1,2,6,7}$  | 0.02    | $F_{2,2,6,7}$  | -0.02   | $F_{1,3,6,7}$  | -0.01   | $F_{2,3,6,7}$ | -0.00  | $F_{3,3,6,7}$  | -0.02   |
| $F_{1,4,6,7}$  | -0.02   | $F_{2,4,6,7}$  | -0.01   | $F_{3,4,6,7}$  | 0.02    | $F_{4,4,6,7}$ | 0.03   | $F_{1,5,6,7}$  | -0.02   |
| $F_{2,5,6,7}$  | -0.00   | $F_{3,5,6,7}$  | -0.00   | $F_{4,5,6,7}$  | 0.02    | $F_{5,5,6,7}$ | 0.02   | $F_{1,6,6,7}$  | 0.02    |
| $F_{2,6,6,7}$  | -0.01   | $F_{3,6,6,7}$  | 0.04    | $F_{4,6,6,7}$  | -0.02   | $F_{5,6,6,7}$ | 0.00   | $F_{6,6,6,7}$  | -0.06   |
| $F_{1,1,7,7}$  | -0.01   | $F_{1,2,7,7}$  | -0.00   | $F_{2,2,7,7}$  | -0.04   | $F_{1,3,7,7}$ | -0.01  | $F_{2,3,7,7}$  | 0.01    |
| $F_{3,3,7,7}$  | 0.01    | $F_{1,4,7,7}$  | 0.02    | $F_{2,4,7,7}$  | 0.06    | $F_{3,4,7,7}$ | 0.01   | $F_{4,4,7,7}$  | -0.08   |
| $F_{1,5,7,7}$  | 0.00    | $F_{2,5,7,7}$  | 0.01    | $F_{3,5,7,7}$  | 0.01    | $F_{4,5,7,7}$ | -0.03  | $F_{5,5,7,7}$  | -0.33   |
| $F_{1,6,7,7}$  | 0.01    | $F_{2,6,7,7}$  | -0.01   | $F_{3,6,7,7}$  | 0.00    | $F_{4,6,7,7}$ | -0.02  | $F_{5,6,7,7}$  | 0.01    |
| $F_{6,6,7,7}$  | 0.01    | $F_{1,7,7,7}$  | -0.01   | $F_{2,7,7,7}$  | -0.06   | $F_{3,7,7,7}$ | -0.00  | $F_{4,7,7,7}$  | 0.09    |
| $F_{5,7,7,7}$  | -0.00   | $F_{6,7,7,7}$  | 0.00    | $F_{7,7,7,7}$  | 0.66    | $F_{1,1,1,8}$ | 0.02   | $F_{1,1,2,8}$  | 0.02    |
| $F_{1,2,2,8}$  | 0.07    | $F_{2,2,2,8}$  | -0.07   | $F_{1,1,3,8}$  | 0.02    | $F_{1,2,3,8}$ | -0.00  | $F_{2,2,3,8}$  | -0.05   |
| $F_{1,3,3,8}$  | 0.01    | $F_{2,3,3,8}$  | 0.01    | $F_{3,3,3,8}$  | -0.03   | $F_{1,1,4,8}$ | -0.03  | $F_{1,2,4,8}$  | -0.02   |
| $F_{2,2,4,8}$  | -0.04   | $F_{1,3,4,8}$  | -0.02   | $F_{2,3,4,8}$  | 0.03    | $F_{3,3,4,8}$ | -0.01  | $F_{1,4,4,8}$  | 0.03    |

Table S6: The CcCR Force Constants for HOOH (cont.)

|               |       |               |       |               |       |               |       |               |       |
|---------------|-------|---------------|-------|---------------|-------|---------------|-------|---------------|-------|
| $F_{2,4,4,8}$ | 0.05  | $F_{3,4,4,8}$ | 0.00  | $F_{4,4,4,8}$ | -0.00 | $F_{1,1,5,8}$ | 0.04  | $F_{1,2,5,8}$ | -0.05 |
| $F_{2,2,5,8}$ | 0.00  | $F_{1,3,5,8}$ | -0.03 | $F_{2,3,5,8}$ | 0.03  | $F_{3,3,5,8}$ | 0.02  | $F_{1,4,5,8}$ | -0.01 |
| $F_{2,4,5,8}$ | 0.06  | $F_{3,4,5,8}$ | 0.01  | $F_{4,4,5,8}$ | 0.27  | $F_{1,5,5,8}$ | 0.09  | $F_{2,5,5,8}$ | -0.06 |
| $F_{3,5,5,8}$ | -0.09 | $F_{4,5,5,8}$ | -0.27 | $F_{5,5,5,8}$ | -2.11 | $F_{1,1,6,8}$ | -0.01 | $F_{1,2,6,8}$ | 0.03  |
| $F_{2,2,6,8}$ | 0.03  | $F_{1,3,6,8}$ | -0.01 | $F_{2,3,6,8}$ | 0.01  | $F_{3,3,6,8}$ | 0.03  | $F_{1,4,6,8}$ | 0.01  |
| $F_{2,4,6,8}$ | -0.06 | $F_{3,4,6,8}$ | 0.01  | $F_{4,4,6,8}$ | 0.02  | $F_{1,5,6,8}$ | 0.02  | $F_{2,5,6,8}$ | -0.06 |
| $F_{3,5,6,8}$ | -0.00 | $F_{4,5,6,8}$ | 0.00  | $F_{5,5,6,8}$ | 0.12  | $F_{1,6,6,8}$ | 0.03  | $F_{2,6,6,8}$ | 0.01  |
| $F_{3,6,6,8}$ | -0.02 | $F_{4,6,6,8}$ | -0.01 | $F_{5,6,6,8}$ | 0.30  | $F_{6,6,6,8}$ | 0.02  | $F_{1,1,7,8}$ | 0.01  |
| $F_{1,2,7,8}$ | 0.01  | $F_{2,2,7,8}$ | -0.03 | $F_{1,3,7,8}$ | 0.00  | $F_{2,3,7,8}$ | -0.03 | $F_{3,3,7,8}$ | 0.00  |
| $F_{1,4,7,8}$ | -0.01 | $F_{2,4,7,8}$ | -0.03 | $F_{3,4,7,8}$ | 0.01  | $F_{4,4,7,8}$ | -0.03 | $F_{1,5,7,8}$ | -0.03 |
| $F_{2,5,7,8}$ | -0.01 | $F_{3,5,7,8}$ | 0.01  | $F_{4,5,7,8}$ | -0.23 | $F_{5,5,7,8}$ | 0.22  | $F_{1,6,7,8}$ | 0.00  |
| $F_{2,6,7,8}$ | 0.02  | $F_{3,6,7,8}$ | 0.00  | $F_{4,6,7,8}$ | -0.02 | $F_{5,6,7,8}$ | 0.01  | $F_{6,6,7,8}$ | -0.01 |
| $F_{1,7,7,8}$ | 0.00  | $F_{2,7,7,8}$ | 0.02  | $F_{3,7,7,8}$ | -0.01 | $F_{4,7,7,8}$ | 0.05  | $F_{5,7,7,8}$ | 0.27  |
| $F_{6,7,7,8}$ | -0.01 | $F_{7,7,7,8}$ | -1.03 | $F_{1,1,8,8}$ | -0.05 | $F_{1,2,8,8}$ | -0.02 | $F_{2,2,8,8}$ | 0.06  |
| $F_{1,3,8,8}$ | 0.04  | $F_{2,3,8,8}$ | 0.02  | $F_{3,3,8,8}$ | -0.02 | $F_{1,4,8,8}$ | 0.03  | $F_{2,4,8,8}$ | -0.02 |
| $F_{3,4,8,8}$ | -0.05 | $F_{4,4,8,8}$ | -0.33 | $F_{1,5,8,8}$ | -0.04 | $F_{2,5,8,8}$ | 0.06  | $F_{3,5,8,8}$ | 0.06  |
| $F_{4,5,8,8}$ | 0.22  | $F_{5,5,8,8}$ | 2.11  | $F_{1,6,8,8}$ | -0.05 | $F_{2,6,8,8}$ | 0.03  | $F_{3,6,8,8}$ | -0.01 |
| $F_{4,6,8,8}$ | 0.06  | $F_{5,6,8,8}$ | -0.03 | $F_{6,6,8,8}$ | -0.32 | $F_{1,7,8,8}$ | 0.02  | $F_{2,7,8,8}$ | 0.03  |
| $F_{3,7,8,8}$ | 0.03  | $F_{4,7,8,8}$ | 0.27  | $F_{5,7,8,8}$ | -0.27 | $F_{6,7,8,8}$ | -0.04 | $F_{7,7,8,8}$ | -0.64 |
| $F_{1,8,8,8}$ | 0.06  | $F_{2,8,8,8}$ | -0.13 | $F_{3,8,8,8}$ | -0.08 | $F_{4,8,8,8}$ | -0.18 | $F_{5,8,8,8}$ | -2.11 |
| $F_{6,8,8,8}$ | 0.02  | $F_{7,8,8,8}$ | 0.93  | $F_{8,8,8,8}$ | 2.02  | $F_{1,1,1,9}$ | -0.02 | $F_{1,1,2,9}$ | -0.01 |
| $F_{1,2,2,9}$ | 0.03  | $F_{2,2,2,9}$ | 0.00  | $F_{1,1,3,9}$ | 0.01  | $F_{1,2,3,9}$ | -0.00 | $F_{2,2,3,9}$ | -0.00 |
| $F_{1,3,3,9}$ | 0.01  | $F_{2,3,3,9}$ | 0.03  | $F_{3,3,3,9}$ | -0.00 | $F_{1,1,4,9}$ | 0.01  | $F_{1,2,4,9}$ | 0.01  |
| $F_{2,2,4,9}$ | -0.02 | $F_{1,3,4,9}$ | -0.01 | $F_{2,3,4,9}$ | 0.01  | $F_{3,3,4,9}$ | -0.03 | $F_{1,4,4,9}$ | -0.01 |
| $F_{2,4,4,9}$ | -0.01 | $F_{3,4,4,9}$ | 0.01  | $F_{4,4,4,9}$ | -0.00 | $F_{1,1,5,9}$ | 0.02  | $F_{1,2,5,9}$ | 0.00  |
| $F_{2,2,5,9}$ | -0.03 | $F_{1,3,5,9}$ | 0.00  | $F_{2,3,5,9}$ | 0.01  | $F_{3,3,5,9}$ | -0.02 | $F_{1,4,5,9}$ | -0.03 |
| $F_{2,4,5,9}$ | -0.01 | $F_{3,4,5,9}$ | -0.01 | $F_{4,4,5,9}$ | 0.01  | $F_{1,5,5,9}$ | -0.03 | $F_{2,5,5,9}$ | 0.01  |
| $F_{3,5,5,9}$ | 0.01  | $F_{4,5,5,9}$ | 0.04  | $F_{5,5,5,9}$ | -0.02 | $F_{1,1,6,9}$ | -0.02 | $F_{1,2,6,9}$ | 0.01  |
| $F_{2,2,6,9}$ | 0.04  | $F_{1,3,6,9}$ | -0.01 | $F_{2,3,6,9}$ | -0.03 | $F_{3,3,6,9}$ | 0.01  | $F_{1,4,6,9}$ | 0.02  |
| $F_{2,4,6,9}$ | -0.03 | $F_{3,4,6,9}$ | 0.03  | $F_{4,4,6,9}$ | -0.02 | $F_{1,5,6,9}$ | 0.01  | $F_{2,5,6,9}$ | -0.02 |
| $F_{3,5,6,9}$ | 0.05  | $F_{4,5,6,9}$ | 0.02  | $F_{5,5,6,9}$ | 0.32  | $F_{1,6,6,9}$ | 0.02  | $F_{2,6,6,9}$ | 0.07  |
| $F_{3,6,6,9}$ | -0.02 | $F_{4,6,6,9}$ | -0.04 | $F_{5,6,6,9}$ | -0.09 | $F_{6,6,6,9}$ | 0.01  | $F_{1,1,7,9}$ | 0.01  |
| $F_{1,2,7,9}$ | 0.00  | $F_{2,2,7,9}$ | -0.01 | $F_{1,3,7,9}$ | 0.00  | $F_{2,3,7,9}$ | -0.01 | $F_{3,3,7,9}$ | 0.02  |
| $F_{1,4,7,9}$ | -0.01 | $F_{2,4,7,9}$ | -0.01 | $F_{3,4,7,9}$ | 0.01  | $F_{4,4,7,9}$ | 0.02  | $F_{1,5,7,9}$ | 0.01  |
| $F_{2,5,7,9}$ | 0.00  | $F_{3,5,7,9}$ | 0.01  | $F_{4,5,7,9}$ | 0.02  | $F_{5,5,7,9}$ | -0.06 | $F_{1,6,7,9}$ | 0.00  |
| $F_{2,6,7,9}$ | 0.02  | $F_{3,6,7,9}$ | -0.02 | $F_{4,6,7,9}$ | -0.00 | $F_{5,6,7,9}$ | -0.01 | $F_{6,6,7,9}$ | 0.01  |
| $F_{1,7,7,9}$ | -0.00 | $F_{2,7,7,9}$ | 0.01  | $F_{3,7,7,9}$ | -0.01 | $F_{4,7,7,9}$ | -0.03 | $F_{5,7,7,9}$ | -0.02 |
| $F_{6,7,7,9}$ | -0.02 | $F_{7,7,7,9}$ | 2.33  | $F_{1,1,8,9}$ | -0.00 | $F_{1,2,8,9}$ | -0.03 | $F_{2,2,8,9}$ | 0.02  |
| $F_{1,3,8,9}$ | -0.00 | $F_{2,3,8,9}$ | -0.01 | $F_{3,3,8,9}$ | -0.00 | $F_{1,4,8,9}$ | 0.01  | $F_{2,4,8,9}$ | 0.02  |
| $F_{3,4,8,9}$ | 0.01  | $F_{4,4,8,9}$ | -0.01 | $F_{1,5,8,9}$ | 0.02  | $F_{2,5,8,9}$ | 0.02  | $F_{3,5,8,9}$ | -0.02 |
| $F_{4,5,8,9}$ | -0.01 | $F_{5,5,8,9}$ | 0.03  | $F_{1,6,8,9}$ | -0.02 | $F_{2,6,8,9}$ | -0.02 | $F_{3,6,8,9}$ | -0.02 |
| $F_{4,6,8,9}$ | -0.01 | $F_{5,6,8,9}$ | -0.28 | $F_{6,6,8,9}$ | -0.03 | $F_{1,7,8,9}$ | -0.01 | $F_{2,7,8,9}$ | 0.01  |
| $F_{3,7,8,9}$ | -0.01 | $F_{4,7,8,9}$ | -0.02 | $F_{5,7,8,9}$ | -0.00 | $F_{6,7,8,9}$ | 0.02  | $F_{7,7,8,9}$ | -0.99 |
| $F_{1,8,8,9}$ | 0.00  | $F_{2,8,8,9}$ | -0.04 | $F_{3,8,8,9}$ | 0.04  | $F_{4,8,8,9}$ | -0.02 | $F_{5,8,8,9}$ | -0.12 |
| $F_{6,8,8,9}$ | 0.32  | $F_{7,8,8,9}$ | -0.25 | $F_{8,8,8,9}$ | 0.65  | $F_{1,1,9,9}$ | 0.01  | $F_{1,2,9,9}$ | -0.01 |
| $F_{2,2,9,9}$ | -0.03 | $F_{1,3,9,9}$ | 0.00  | $F_{2,3,9,9}$ | 0.00  | $F_{3,3,9,9}$ | -0.00 | $F_{1,4,9,9}$ | -0.01 |
| $F_{2,4,9,9}$ | 0.02  | $F_{3,4,9,9}$ | -0.00 | $F_{4,4,9,9}$ | 0.01  | $F_{1,5,9,9}$ | -0.01 | $F_{2,5,9,9}$ | 0.01  |
| $F_{3,5,9,9}$ | -0.02 | $F_{4,5,9,9}$ | -0.01 | $F_{5,5,9,9}$ | -0.32 | $F_{1,6,9,9}$ | -0.01 | $F_{2,6,9,9}$ | -0.04 |
| $F_{3,6,9,9}$ | 0.02  | $F_{4,6,9,9}$ | -0.01 | $F_{5,6,9,9}$ | 0.03  | $F_{6,6,9,9}$ | -0.00 | $F_{1,7,9,9}$ | -0.01 |

Table S7: The CcCR Force Constants for HOOH (cont.)

|                  |       |                  |       |                   |       |                  |       |                  |       |
|------------------|-------|------------------|-------|-------------------|-------|------------------|-------|------------------|-------|
| $F_{2,7,9,9}$    | -0.00 | $F_{3,7,9,9}$    | 0.00  | $F_{4,7,9,9}$     | -0.02 | $F_{5,7,9,9}$    | -0.01 | $F_{6,7,9,9}$    | 0.04  |
| $F_{7,7,9,9}$    | 1.68  | $F_{1,8,9,9}$    | 0.02  | $F_{2,8,9,9}$     | 0.04  | $F_{3,8,9,9}$    | 0.02  | $F_{4,8,9,9}$    | 0.00  |
| $F_{5,8,9,9}$    | 0.30  | $F_{6,8,9,9}$    | 0.09  | $F_{7,8,9,9}$     | -0.57 | $F_{8,8,9,9}$    | -0.51 | $F_{1,9,9,9}$    | 0.01  |
| $F_{2,9,9,9}$    | 0.03  | $F_{3,9,9,9}$    | -0.01 | $F_{4,9,9,9}$     | 0.06  | $F_{5,9,9,9}$    | -0.02 | $F_{6,9,9,9}$    | 0.01  |
| $F_{7,9,9,9}$    | -0.16 | $F_{8,9,9,9}$    | -0.14 | $F_{9,9,9,9}$     | -0.99 | $F_{1,1,1,10}$   | -0.00 | $F_{1,1,2,10}$   | 0.00  |
| $F_{1,2,2,10}$   | -0.00 | $F_{2,2,2,10}$   | 0.00  | $F_{1,1,3,10}$    | 0.00  | $F_{1,2,3,10}$   | 0.00  | $F_{2,2,3,10}$   | -0.00 |
| $F_{1,3,3,10}$   | 0.00  | $F_{2,3,3,10}$   | -0.00 | $F_{3,3,3,10}$    | 0.00  | $F_{1,1,4,10}$   | 0.00  | $F_{1,2,4,10}$   | -0.00 |
| $F_{2,2,4,10}$   | 0.00  | $F_{1,3,4,10}$   | -0.00 | $F_{2,3,4,10}$    | -0.00 | $F_{3,3,4,10}$   | -0.00 | $F_{1,4,4,10}$   | -0.00 |
| $F_{2,4,4,10}$   | -0.00 | $F_{3,4,4,10}$   | -0.00 | $F_{4,4,4,10}$    | -0.01 | $F_{1,1,5,10}$   | 0.00  | $F_{1,2,5,10}$   | 0.00  |
| $F_{2,2,5,10}$   | 0.00  | $F_{1,3,5,10}$   | 0.00  | $F_{2,3,5,10}$    | 0.00  | $F_{3,3,5,10}$   | 0.00  | $F_{1,4,5,10}$   | -0.00 |
| $F_{2,4,5,10}$   | -0.00 | $F_{3,4,5,10}$   | -0.01 | $F_{4,4,5,10}$    | 0.00  | $F_{1,5,5,10}$   | -0.00 | $F_{2,5,5,10}$   | 0.00  |
| $F_{3,5,5,10}$   | -0.01 | $F_{4,5,5,10}$   | 0.02  | $F_{5,5,5,10}$    | 0.06  | $F_{1,1,6,10}$   | -0.00 | $F_{1,2,6,10}$   | -0.00 |
| $F_{2,2,6,10}$   | -0.00 | $F_{1,3,6,10}$   | -0.00 | $F_{2,3,6,10}$    | 0.00  | $F_{3,3,6,10}$   | -0.00 | $F_{1,4,6,10}$   | 0.00  |
| $F_{2,4,6,10}$   | 0.00  | $F_{3,4,6,10}$   | 0.00  | $F_{4,4,6,10}$    | 0.00  | $F_{1,5,6,10}$   | -0.00 | $F_{2,5,6,10}$   | -0.00 |
| $F_{3,5,6,10}$   | -0.00 | $F_{4,5,6,10}$   | 0.01  | $F_{5,5,6,10}$    | -0.00 | $F_{1,6,6,10}$   | 0.00  | $F_{2,6,6,10}$   | -0.00 |
| $F_{3,6,6,10}$   | 0.00  | $F_{4,6,6,10}$   | -0.01 | $F_{5,6,6,10}$    | 0.02  | $F_{6,6,6,10}$   | -0.01 | $F_{1,1,7,10}$   | 0.00  |
| $F_{1,2,7,10}$   | -0.00 | $F_{2,2,7,10}$   | -0.00 | $F_{1,3,7,10}$    | 0.00  | $F_{2,3,7,10}$   | -0.00 | $F_{3,3,7,10}$   | 0.00  |
| $F_{1,4,7,10}$   | 0.00  | $F_{2,4,7,10}$   | 0.00  | $F_{3,4,7,10}$    | -0.00 | $F_{4,4,7,10}$   | 0.02  | $F_{1,5,7,10}$   | 0.01  |
| $F_{2,5,7,10}$   | 0.00  | $F_{3,5,7,10}$   | 0.00  | $F_{4,5,7,10}$    | -0.01 | $F_{5,5,7,10}$   | 0.03  | $F_{1,6,7,10}$   | -0.00 |
| $F_{2,6,7,10}$   | -0.00 | $F_{3,6,7,10}$   | -0.00 | $F_{4,6,7,10}$    | 0.01  | $F_{5,6,7,10}$   | -0.01 | $F_{6,6,7,10}$   | -0.01 |
| $F_{1,7,7,10}$   | -0.00 | $F_{2,7,7,10}$   | 0.01  | $F_{3,7,7,10}$    | -0.00 | $F_{4,7,7,10}$   | -0.03 | $F_{5,7,7,10}$   | 0.03  |
| $F_{6,7,7,10}$   | 0.01  | $F_{7,7,7,10}$   | -0.74 | $F_{1,1,8,10}$    | -0.00 | $F_{1,2,8,10}$   | -0.00 | $F_{2,2,8,10}$   | -0.00 |
| $F_{1,3,8,10}$   | -0.00 | $F_{2,3,8,10}$   | 0.00  | $F_{3,3,8,10}$    | 0.00  | $F_{1,4,8,10}$   | 0.01  | $F_{2,4,8,10}$   | -0.00 |
| $F_{3,4,8,10}$   | 0.01  | $F_{4,4,8,10}$   | 0.00  | $F_{1,5,8,10}$    | 0.00  | $F_{2,5,8,10}$   | -0.00 | $F_{3,5,8,10}$   | 0.01  |
| $F_{4,5,8,10}$   | -0.03 | $F_{5,5,8,10}$   | -0.04 | $F_{1,6,8,10}$    | 0.00  | $F_{2,6,8,10}$   | 0.00  | $F_{3,6,8,10}$   | 0.00  |
| $F_{4,6,8,10}$   | -0.01 | $F_{5,6,8,10}$   | -0.02 | $F_{6,6,8,10}$    | -0.01 | $F_{1,7,8,10}$   | -0.00 | $F_{2,7,8,10}$   | 0.00  |
| $F_{3,7,8,10}$   | 0.00  | $F_{4,7,8,10}$   | -0.02 | $F_{5,7,8,10}$    | -0.01 | $F_{6,7,8,10}$   | 0.03  | $F_{7,7,8,10}$   | 0.97  |
| $F_{1,8,8,10}$   | -0.00 | $F_{2,8,8,10}$   | 0.01  | $F_{3,8,8,10}$    | -0.02 | $F_{4,8,8,10}$   | 0.02  | $F_{5,8,8,10}$   | 0.09  |
| $F_{6,8,8,10}$   | 0.03  | $F_{7,8,8,10}$   | 0.34  | $F_{8,8,8,10}$    | -0.81 | $F_{1,1,9,10}$   | -0.00 | $F_{1,2,9,10}$   | -0.00 |
| $F_{2,2,9,10}$   | 0.00  | $F_{1,3,9,10}$   | 0.00  | $F_{2,3,9,10}$    | 0.00  | $F_{3,3,9,10}$   | -0.00 | $F_{1,4,9,10}$   | 0.00  |
| $F_{2,4,9,10}$   | 0.00  | $F_{3,4,9,10}$   | -0.00 | $F_{4,4,9,10}$    | -0.01 | $F_{1,5,9,10}$   | -0.00 | $F_{2,5,9,10}$   | -0.00 |
| $F_{3,5,9,10}$   | -0.00 | $F_{4,5,9,10}$   | -0.00 | $F_{5,5,9,10}$    | 0.05  | $F_{1,6,9,10}$   | -0.00 | $F_{2,6,9,10}$   | -0.00 |
| $F_{3,6,9,10}$   | 0.00  | $F_{4,6,9,10}$   | 0.00  | $F_{5,6,9,10}$    | -0.02 | $F_{6,6,9,10}$   | 0.01  | $F_{1,7,9,10}$   | -0.00 |
| $F_{2,7,9,10}$   | -0.00 | $F_{3,7,9,10}$   | 0.00  | $F_{4,7,9,10}$    | 0.02  | $F_{5,7,9,10}$   | -0.01 | $F_{6,7,9,10}$   | 0.02  |
| $F_{7,7,9,10}$   | -2.30 | $F_{1,8,9,10}$   | 0.00  | $F_{2,8,9,10}$    | -0.00 | $F_{3,8,9,10}$   | 0.00  | $F_{4,8,9,10}$   | 0.02  |
| $F_{5,8,9,10}$   | -0.02 | $F_{6,8,9,10}$   | 0.01  | $F_{7,8,9,10}$    | 1.01  | $F_{8,8,9,10}$   | 0.27  | $F_{1,9,9,10}$   | 0.00  |
| $F_{2,9,9,10}$   | -0.01 | $F_{3,9,9,10}$   | 0.00  | $F_{4,9,9,10}$    | 0.02  | $F_{5,9,9,10}$   | 0.03  | $F_{6,9,9,10}$   | -0.02 |
| $F_{7,9,9,10}$   | -1.66 | $F_{8,9,9,10}$   | 0.55  | $F_{9,9,9,10}$    | 0.09  | $F_{1,1,10,10}$  | -0.00 | $F_{1,2,10,10}$  | -0.00 |
| $F_{2,2,10,10}$  | 0.00  | $F_{1,3,10,10}$  | -0.00 | $F_{2,3,10,10}$   | -0.00 | $F_{3,3,10,10}$  | -0.00 | $F_{1,4,10,10}$  | 0.00  |
| $F_{2,4,10,10}$  | 0.00  | $F_{3,4,10,10}$  | 0.00  | $F_{4,4,10,10}$   | -0.01 | $F_{1,5,10,10}$  | -0.00 | $F_{2,5,10,10}$  | -0.00 |
| $F_{3,5,10,10}$  | 0.00  | $F_{4,5,10,10}$  | 0.01  | $F_{5,5,10,10}$   | -0.05 | $F_{1,6,10,10}$  | 0.00  | $F_{2,6,10,10}$  | 0.00  |
| $F_{3,6,10,10}$  | 0.00  | $F_{4,6,10,10}$  | -0.01 | $F_{5,6,10,10}$   | 0.00  | $F_{6,6,10,10}$  | 0.01  | $F_{1,7,10,10}$  | 0.00  |
| $F_{2,7,10,10}$  | -0.01 | $F_{3,7,10,10}$  | 0.00  | $F_{4,7,10,10}$   | 0.01  | $F_{5,7,10,10}$  | -0.03 | $F_{6,7,10,10}$  | -0.01 |
| $F_{7,7,10,10}$  | 0.78  | $F_{1,8,10,10}$  | 0.00  | $F_{2,8,10,10}$   | -0.00 | $F_{3,8,10,10}$  | -0.00 | $F_{4,8,10,10}$  | 0.01  |
| $F_{5,8,10,10}$  | 0.04  | $F_{6,8,10,10}$  | -0.02 | $F_{7,8,10,10}$   | -0.95 | $F_{8,8,10,10}$  | -0.36 | $F_{1,9,10,10}$  | 0.00  |
| $F_{2,9,10,10}$  | 0.00  | $F_{3,9,10,10}$  | -0.00 | $F_{4,9,10,10}$   | -0.01 | $F_{5,9,10,10}$  | 0.01  | $F_{6,9,10,10}$  | -0.02 |
| $F_{7,9,10,10}$  | 2.28  | $F_{8,9,10,10}$  | -1.03 | $F_{9,9,10,10}$   | 1.64  | $F_{1,10,10,10}$ | -0.00 | $F_{2,10,10,10}$ | 0.00  |
| $F_{3,10,10,10}$ | -0.00 | $F_{4,10,10,10}$ | -0.00 | $F_{5,10,10,10}$  | 0.02  | $F_{6,10,10,10}$ | 0.02  | $F_{7,10,10,10}$ | -0.80 |
| $F_{8,10,10,10}$ | 0.95  | $F_{9,10,10,10}$ | -2.27 | $F_{10,10,10,10}$ | 0.80  | $F_{1,1,1,11}$   | 0.00  | $F_{1,1,2,11}$   | 0.00  |



Table S8: The CcCR Force Constants for HOOH (cont.)

|                  |       |                  |       |                   |       |                  |       |                  |       |
|------------------|-------|------------------|-------|-------------------|-------|------------------|-------|------------------|-------|
| $F_{1,2,2,11}$   | 0.00  | $F_{2,2,2,11}$   | 0.01  | $F_{1,1,3,11}$    | 0.00  | $F_{1,2,3,11}$   | 0.00  | $F_{2,2,3,11}$   | -0.00 |
| $F_{1,3,3,11}$   | -0.00 | $F_{2,3,3,11}$   | -0.00 | $F_{3,3,3,11}$    | -0.00 | $F_{1,1,4,11}$   | -0.01 | $F_{1,2,4,11}$   | -0.00 |
| $F_{2,2,4,11}$   | -0.01 | $F_{1,3,4,11}$   | -0.00 | $F_{2,3,4,11}$    | -0.00 | $F_{3,3,4,11}$   | 0.01  | $F_{1,4,4,11}$   | 0.01  |
| $F_{2,4,4,11}$   | 0.01  | $F_{3,4,4,11}$   | 0.00  | $F_{4,4,4,11}$    | -0.06 | $F_{1,1,5,11}$   | -0.00 | $F_{1,2,5,11}$   | -0.00 |
| $F_{2,2,5,11}$   | -0.01 | $F_{1,3,5,11}$   | -0.00 | $F_{2,3,5,11}$    | 0.00  | $F_{3,3,5,11}$   | 0.01  | $F_{1,4,5,11}$   | 0.00  |
| $F_{2,4,5,11}$   | 0.01  | $F_{3,4,5,11}$   | 0.01  | $F_{4,4,5,11}$    | 0.02  | $F_{1,5,5,11}$   | 0.01  | $F_{2,5,5,11}$   | 0.01  |
| $F_{3,5,5,11}$   | 0.00  | $F_{4,5,5,11}$   | 0.03  | $F_{5,5,5,11}$    | -0.13 | $F_{1,1,6,11}$   | -0.00 | $F_{1,2,6,11}$   | -0.00 |
| $F_{2,2,6,11}$   | -0.00 | $F_{1,3,6,11}$   | 0.00  | $F_{2,3,6,11}$    | 0.00  | $F_{3,3,6,11}$   | 0.00  | $F_{1,4,6,11}$   | 0.00  |
| $F_{2,4,6,11}$   | 0.01  | $F_{3,4,6,11}$   | -0.01 | $F_{4,4,6,11}$    | -0.01 | $F_{1,5,6,11}$   | 0.00  | $F_{2,5,6,11}$   | 0.00  |
| $F_{3,5,6,11}$   | -0.01 | $F_{4,5,6,11}$   | -0.01 | $F_{5,5,6,11}$    | 0.04  | $F_{1,6,6,11}$   | -0.01 | $F_{2,6,6,11}$   | -0.01 |
| $F_{3,6,6,11}$   | -0.01 | $F_{4,6,6,11}$   | -0.00 | $F_{5,6,6,11}$    | 0.04  | $F_{6,6,6,11}$   | -0.03 | $F_{1,1,7,11}$   | 0.00  |
| $F_{1,2,7,11}$   | 0.00  | $F_{2,2,7,11}$   | 0.01  | $F_{1,3,7,11}$    | 0.00  | $F_{2,3,7,11}$   | 0.00  | $F_{3,3,7,11}$   | -0.00 |
| $F_{1,4,7,11}$   | 0.00  | $F_{2,4,7,11}$   | -0.01 | $F_{3,4,7,11}$    | -0.00 | $F_{4,4,7,11}$   | 0.06  | $F_{1,5,7,11}$   | -0.00 |
| $F_{2,5,7,11}$   | -0.01 | $F_{3,5,7,11}$   | -0.00 | $F_{4,5,7,11}$    | -0.03 | $F_{5,5,7,11}$   | -0.02 | $F_{1,6,7,11}$   | -0.00 |
| $F_{2,6,7,11}$   | -0.00 | $F_{3,6,7,11}$   | 0.00  | $F_{4,6,7,11}$    | 0.01  | $F_{5,6,7,11}$   | -0.02 | $F_{6,6,7,11}$   | 0.02  |
| $F_{1,7,7,11}$   | -0.00 | $F_{2,7,7,11}$   | 0.01  | $F_{3,7,7,11}$    | 0.00  | $F_{4,7,7,11}$   | -0.08 | $F_{5,7,7,11}$   | 0.05  |
| $F_{6,7,7,11}$   | 0.01  | $F_{7,7,7,11}$   | 1.09  | $F_{1,1,8,11}$    | -0.00 | $F_{1,2,8,11}$   | 0.00  | $F_{2,2,8,11}$   | 0.01  |
| $F_{1,3,8,11}$   | -0.00 | $F_{2,3,8,11}$   | 0.00  | $F_{3,3,8,11}$    | -0.00 | $F_{1,4,8,11}$   | 0.00  | $F_{2,4,8,11}$   | -0.01 |
| $F_{3,4,8,11}$   | 0.00  | $F_{4,4,8,11}$   | 0.01  | $F_{1,5,8,11}$    | -0.00 | $F_{2,5,8,11}$   | -0.01 | $F_{3,5,8,11}$   | -0.00 |
| $F_{4,5,8,11}$   | -0.01 | $F_{5,5,8,11}$   | 0.06  | $F_{1,6,8,11}$    | 0.00  | $F_{2,6,8,11}$   | 0.00  | $F_{3,6,8,11}$   | 0.00  |
| $F_{4,6,8,11}$   | -0.00 | $F_{5,6,8,11}$   | -0.02 | $F_{6,6,8,11}$    | 0.01  | $F_{1,7,8,11}$   | -0.00 | $F_{2,7,8,11}$   | 0.01  |
| $F_{3,7,8,11}$   | -0.01 | $F_{4,7,8,11}$   | -0.02 | $F_{5,7,8,11}$    | 0.06  | $F_{6,7,8,11}$   | 0.01  | $F_{7,7,8,11}$   | 0.35  |
| $F_{1,8,8,11}$   | 0.00  | $F_{2,8,8,11}$   | 0.01  | $F_{3,8,8,11}$    | 0.00  | $F_{4,8,8,11}$   | -0.03 | $F_{5,8,8,11}$   | -0.06 |
| $F_{6,8,8,11}$   | -0.01 | $F_{7,8,8,11}$   | -0.69 | $F_{8,8,8,11}$    | 0.23  | $F_{1,1,9,11}$   | -0.00 | $F_{1,2,9,11}$   | -0.00 |
| $F_{2,2,9,11}$   | 0.00  | $F_{1,3,9,11}$   | 0.00  | $F_{2,3,9,11}$    | 0.00  | $F_{3,3,9,11}$   | -0.00 | $F_{1,4,9,11}$   | 0.00  |
| $F_{2,4,9,11}$   | 0.00  | $F_{3,4,9,11}$   | -0.00 | $F_{4,4,9,11}$    | 0.01  | $F_{1,5,9,11}$   | -0.00 | $F_{2,5,9,11}$   | -0.00 |
| $F_{3,5,9,11}$   | -0.00 | $F_{4,5,9,11}$   | -0.02 | $F_{5,5,9,11}$    | -0.03 | $F_{1,6,9,11}$   | -0.00 | $F_{2,6,9,11}$   | -0.00 |
| $F_{3,6,9,11}$   | 0.00  | $F_{4,6,9,11}$   | 0.02  | $F_{5,6,9,11}$    | -0.02 | $F_{6,6,9,11}$   | 0.04  | $F_{1,7,9,11}$   | -0.00 |
| $F_{2,7,9,11}$   | -0.01 | $F_{3,7,9,11}$   | 0.00  | $F_{4,7,9,11}$    | 0.01  | $F_{5,7,9,11}$   | 0.06  | $F_{6,7,9,11}$   | -0.03 |
| $F_{7,7,9,11}$   | 1.00  | $F_{1,8,9,11}$   | 0.00  | $F_{2,8,9,11}$    | -0.00 | $F_{3,8,9,11}$   | -0.00 | $F_{4,8,9,11}$   | 0.00  |
| $F_{5,8,9,11}$   | 0.06  | $F_{6,8,9,11}$   | -0.02 | $F_{7,8,9,11}$    | 0.24  | $F_{8,8,9,11}$   | -0.49 | $F_{1,9,9,11}$   | -0.00 |
| $F_{2,9,9,11}$   | -0.01 | $F_{3,9,9,11}$   | -0.00 | $F_{4,9,9,11}$    | -0.01 | $F_{5,9,9,11}$   | 0.01  | $F_{6,9,9,11}$   | -0.07 |
| $F_{7,9,9,11}$   | 0.58  | $F_{8,9,9,11}$   | 0.17  | $F_{9,9,9,11}$    | 0.13  | $F_{1,1,10,11}$  | -0.00 | $F_{1,2,10,11}$  | 0.00  |
| $F_{2,2,10,11}$  | 0.00  | $F_{1,3,10,11}$  | -0.00 | $F_{2,3,10,11}$   | -0.00 | $F_{3,3,10,11}$  | -0.00 | $F_{1,4,10,11}$  | -0.00 |
| $F_{2,4,10,11}$  | 0.00  | $F_{3,4,10,11}$  | 0.00  | $F_{4,4,10,11}$   | -0.00 | $F_{1,5,10,11}$  | -0.00 | $F_{2,5,10,11}$  | 0.00  |
| $F_{3,5,10,11}$  | -0.00 | $F_{4,5,10,11}$  | 0.01  | $F_{5,5,10,11}$   | -0.02 | $F_{1,6,10,11}$  | 0.00  | $F_{2,6,10,11}$  | 0.00  |
| $F_{3,6,10,11}$  | 0.00  | $F_{4,6,10,11}$  | -0.00 | $F_{5,6,10,11}$   | 0.03  | $F_{6,6,10,11}$  | -0.01 | $F_{1,7,10,11}$  | -0.00 |
| $F_{2,7,10,11}$  | -0.00 | $F_{3,7,10,11}$  | -0.00 | $F_{4,7,10,11}$   | 0.02  | $F_{5,7,10,11}$  | -0.02 | $F_{6,7,10,11}$  | -0.01 |
| $F_{7,7,10,11}$  | -1.01 | $F_{1,8,10,11}$  | 0.00  | $F_{2,8,10,11}$   | -0.00 | $F_{3,8,10,11}$  | 0.01  | $F_{4,8,10,11}$  | 0.01  |
| $F_{5,8,10,11}$  | -0.05 | $F_{6,8,10,11}$  | -0.00 | $F_{7,8,10,11}$   | -0.33 | $F_{8,8,10,11}$  | 0.71  | $F_{1,9,10,11}$  | 0.00  |
| $F_{2,9,10,11}$  | 0.00  | $F_{3,9,10,11}$  | 0.00  | $F_{4,9,10,11}$   | -0.02 | $F_{5,9,10,11}$  | -0.03 | $F_{6,9,10,11}$  | 0.01  |
| $F_{7,9,10,11}$  | -1.00 | $F_{8,9,10,11}$  | -0.25 | $F_{9,9,10,11}$   | -0.57 | $F_{1,10,10,11}$ | 0.00  | $F_{2,10,10,11}$ | 0.00  |
| $F_{3,10,10,11}$ | 0.00  | $F_{4,10,10,11}$ | -0.02 | $F_{5,10,10,11}$  | 0.02  | $F_{6,10,10,11}$ | 0.01  | $F_{7,10,10,11}$ | 0.98  |
| $F_{8,10,10,11}$ | 0.32  | $F_{9,10,10,11}$ | 1.02  | $F_{10,10,10,11}$ | -0.97 | $F_{1,1,11,11}$  | 0.00  | $F_{1,2,11,11}$  | 0.00  |
| $F_{2,2,11,11}$  | -0.01 | $F_{1,3,11,11}$  | 0.00  | $F_{2,3,11,11}$   | 0.00  | $F_{3,3,11,11}$  | 0.00  | $F_{1,4,11,11}$  | -0.00 |
| $F_{2,4,11,11}$  | 0.01  | $F_{3,4,11,11}$  | -0.00 | $F_{4,4,11,11}$   | -0.04 | $F_{1,5,11,11}$  | -0.00 | $F_{2,5,11,11}$  | 0.01  |
| $F_{3,5,11,11}$  | 0.00  | $F_{4,5,11,11}$  | -0.03 | $F_{5,5,11,11}$   | 0.06  | $F_{1,6,11,11}$  | -0.00 | $F_{2,6,11,11}$  | -0.00 |
| $F_{3,6,11,11}$  | -0.00 | $F_{4,6,11,11}$  | 0.01  | $F_{5,6,11,11}$   | -0.02 | $F_{6,6,11,11}$  | -0.03 | $F_{1,7,11,11}$  | 0.00  |
| $F_{2,7,11,11}$  | -0.01 | $F_{3,7,11,11}$  | 0.00  | $F_{4,7,11,11}$   | 0.06  | $F_{5,7,11,11}$  | -0.04 | $F_{6,7,11,11}$  | 0.02  |

Table S9: The CcCR Force Constants for HOOH (cont.)

|                  |       |                  |       |                   |       |                   |       |                  |       |
|------------------|-------|------------------|-------|-------------------|-------|-------------------|-------|------------------|-------|
| $F_{7,7,11,11}$  | -0.42 | $F_{1,8,11,11}$  | 0.00  | $F_{2,8,11,11}$   | -0.01 | $F_{3,8,11,11}$   | -0.00 | $F_{4,8,11,11}$  | 0.05  |
| $F_{5,8,11,11}$  | 0.00  | $F_{6,8,11,11}$  | 0.03  | $F_{7,8,11,11}$   | 0.62  | $F_{8,8,11,11}$   | -0.18 | $F_{1,9,11,11}$  | 0.00  |
| $F_{2,9,11,11}$  | 0.00  | $F_{3,9,11,11}$  | 0.00  | $F_{4,9,11,11}$   | 0.02  | $F_{5,9,11,11}$   | -0.03 | $F_{6,9,11,11}$  | 0.04  |
| $F_{7,9,11,11}$  | -0.30 | $F_{8,9,11,11}$  | 0.43  | $F_{9,9,11,11}$   | -0.18 | $F_{1,10,11,11}$  | -0.00 | $F_{2,10,11,11}$ | 0.00  |
| $F_{3,10,11,11}$ | -0.00 | $F_{4,10,11,11}$ | -0.02 | $F_{5,10,11,11}$  | 0.07  | $F_{6,10,11,11}$  | -0.03 | $F_{7,10,11,11}$ | 0.35  |
| $F_{8,10,11,11}$ | -0.67 | $F_{9,10,11,11}$ | 0.28  | $F_{10,10,11,11}$ | -0.34 | $F_{1,11,11,11}$  | 0.00  | $F_{2,11,11,11}$ | 0.01  |
| $F_{3,11,11,11}$ | -0.00 | $F_{4,11,11,11}$ | -0.03 | $F_{5,11,11,11}$  | -0.07 | $F_{6,11,11,11}$  | -0.00 | $F_{7,11,11,11}$ | -0.57 |
| $F_{8,11,11,11}$ | 0.18  | $F_{9,11,11,11}$ | -0.40 | $F_{10,11,11,11}$ | 0.59  | $F_{11,11,11,11}$ | -0.11 | $F_{1,1,1,12}$   | 0.00  |
| $F_{1,1,2,12}$   | -0.00 | $F_{1,2,2,12}$   | 0.00  | $F_{2,2,2,12}$    | 0.00  | $F_{1,1,3,12}$    | 0.00  | $F_{1,2,3,12}$   | -0.00 |
| $F_{2,2,3,12}$   | 0.00  | $F_{1,3,3,12}$   | -0.00 | $F_{2,3,3,12}$    | 0.00  | $F_{3,3,3,12}$    | -0.00 | $F_{1,1,4,12}$   | -0.00 |
| $F_{1,2,4,12}$   | 0.00  | $F_{2,2,4,12}$   | -0.00 | $F_{1,3,4,12}$    | -0.00 | $F_{2,3,4,12}$    | -0.00 | $F_{3,3,4,12}$   | 0.00  |
| $F_{1,4,4,12}$   | 0.00  | $F_{2,4,4,12}$   | -0.00 | $F_{3,4,4,12}$    | 0.01  | $F_{4,4,4,12}$    | 0.00  | $F_{1,1,5,12}$   | 0.00  |
| $F_{1,2,5,12}$   | -0.01 | $F_{2,2,5,12}$   | 0.00  | $F_{1,3,5,12}$    | -0.00 | $F_{2,3,5,12}$    | 0.00  | $F_{3,3,5,12}$   | -0.00 |
| $F_{1,4,5,12}$   | -0.00 | $F_{2,4,5,12}$   | 0.01  | $F_{3,4,5,12}$    | 0.00  | $F_{4,4,5,12}$    | 0.01  | $F_{1,5,5,12}$   | 0.02  |
| $F_{2,5,5,12}$   | -0.00 | $F_{3,5,5,12}$   | -0.01 | $F_{4,5,5,12}$    | -0.03 | $F_{5,5,5,12}$    | 0.08  | $F_{1,6,6,12}$   | -0.00 |
| $F_{1,2,6,12}$   | 0.00  | $F_{2,2,6,12}$   | 0.00  | $F_{1,3,6,12}$    | 0.00  | $F_{2,3,6,12}$    | -0.00 | $F_{3,3,6,12}$   | 0.00  |
| $F_{1,4,6,12}$   | 0.00  | $F_{2,4,6,12}$   | 0.00  | $F_{3,4,6,12}$    | -0.00 | $F_{4,4,6,12}$    | -0.01 | $F_{1,5,6,12}$   | 0.00  |
| $F_{2,5,6,12}$   | -0.00 | $F_{3,5,6,12}$   | 0.00  | $F_{4,5,6,12}$    | -0.01 | $F_{5,5,6,12}$    | 0.04  | $F_{1,6,6,12}$   | -0.00 |
| $F_{2,6,6,12}$   | 0.00  | $F_{3,6,6,12}$   | -0.00 | $F_{4,6,6,12}$    | -0.00 | $F_{5,6,6,12}$    | -0.02 | $F_{6,6,6,12}$   | -0.01 |
| $F_{1,1,7,12}$   | -0.00 | $F_{1,2,7,12}$   | -0.00 | $F_{2,2,7,12}$    | 0.00  | $F_{1,3,7,12}$    | 0.00  | $F_{2,3,7,12}$   | 0.00  |
| $F_{3,3,7,12}$   | -0.00 | $F_{1,4,7,12}$   | 0.00  | $F_{2,4,7,12}$    | 0.00  | $F_{3,4,7,12}$    | -0.01 | $F_{4,4,7,12}$   | -0.01 |
| $F_{1,5,7,12}$   | -0.01 | $F_{2,5,7,12}$   | -0.00 | $F_{3,5,7,12}$    | -0.00 | $F_{4,5,7,12}$    | -0.01 | $F_{5,5,7,12}$   | 0.05  |
| $F_{1,6,7,12}$   | -0.00 | $F_{2,6,7,12}$   | -0.00 | $F_{3,6,7,12}$    | 0.00  | $F_{4,6,7,12}$    | 0.01  | $F_{5,6,7,12}$   | 0.01  |
| $F_{6,6,7,12}$   | 0.00  | $F_{1,7,7,12}$   | 0.00  | $F_{2,7,7,12}$    | -0.00 | $F_{3,7,7,12}$    | 0.01  | $F_{4,7,7,12}$   | 0.04  |
| $F_{5,7,7,12}$   | -0.00 | $F_{6,7,7,12}$   | 0.01  | $F_{7,7,7,12}$    | -2.33 | $F_{1,1,8,12}$    | -0.00 | $F_{1,2,8,12}$   | 0.00  |
| $F_{2,2,8,12}$   | -0.00 | $F_{1,3,8,12}$   | 0.00  | $F_{2,3,8,12}$    | 0.00  | $F_{3,3,8,12}$    | 0.00  | $F_{1,4,8,12}$   | -0.00 |
| $F_{2,4,8,12}$   | 0.00  | $F_{3,4,8,12}$   | -0.00 | $F_{4,4,8,12}$    | -0.01 | $F_{1,5,8,12}$    | -0.01 | $F_{2,5,8,12}$   | 0.00  |
| $F_{3,5,8,12}$   | 0.00  | $F_{4,5,8,12}$   | -0.01 | $F_{5,5,8,12}$    | -0.06 | $F_{1,6,8,12}$    | -0.00 | $F_{2,6,8,12}$   | -0.00 |
| $F_{3,6,8,12}$   | -0.00 | $F_{4,6,8,12}$   | 0.01  | $F_{5,6,8,12}$    | -0.02 | $F_{6,6,8,12}$    | 0.02  | $F_{1,7,8,12}$   | 0.01  |
| $F_{2,7,8,12}$   | -0.01 | $F_{3,7,8,12}$   | 0.00  | $F_{4,7,8,12}$    | 0.02  | $F_{5,7,8,12}$    | -0.01 | $F_{6,7,8,12}$   | -0.01 |
| $F_{7,7,8,12}$   | 1.01  | $F_{1,8,8,12}$   | 0.01  | $F_{2,8,8,12}$    | -0.00 | $F_{3,8,8,12}$    | -0.01 | $F_{4,8,8,12}$   | 0.01  |
| $F_{5,8,8,12}$   | 0.09  | $F_{6,8,8,12}$   | 0.01  | $F_{7,8,8,12}$    | 0.26  | $F_{8,8,8,12}$    | -0.58 | $F_{1,9,9,12}$   | 0.00  |
| $F_{1,2,9,12}$   | 0.00  | $F_{2,2,9,12}$   | -0.00 | $F_{1,3,9,12}$    | 0.00  | $F_{2,3,9,12}$    | -0.00 | $F_{3,3,9,12}$   | 0.00  |
| $F_{1,4,9,12}$   | -0.00 | $F_{2,4,9,12}$   | 0.00  | $F_{3,4,9,12}$    | -0.00 | $F_{4,4,9,12}$    | 0.00  | $F_{1,5,9,12}$   | 0.00  |
| $F_{2,5,9,12}$   | 0.00  | $F_{3,5,9,12}$   | 0.00  | $F_{4,5,9,12}$    | 0.00  | $F_{5,5,9,12}$    | -0.01 | $F_{1,6,9,12}$   | -0.00 |
| $F_{2,6,9,12}$   | -0.00 | $F_{3,6,9,12}$   | -0.00 | $F_{4,6,9,12}$    | 0.02  | $F_{5,6,9,12}$    | 0.02  | $F_{6,6,9,12}$   | 0.02  |
| $F_{1,7,9,12}$   | 0.00  | $F_{2,7,9,12}$   | -0.01 | $F_{3,7,9,12}$    | 0.00  | $F_{4,7,9,12}$    | 0.02  | $F_{5,7,9,12}$   | 0.01  |
| $F_{6,7,9,12}$   | -0.03 | $F_{7,7,9,12}$   | -1.65 | $F_{1,8,9,12}$    | -0.00 | $F_{2,8,9,12}$    | -0.01 | $F_{3,8,9,12}$   | -0.00 |
| $F_{4,8,9,12}$   | -0.00 | $F_{5,8,9,12}$   | -0.00 | $F_{6,8,9,12}$    | -0.05 | $F_{7,8,9,12}$    | 0.56  | $F_{8,8,9,12}$   | 0.15  |
| $F_{1,9,9,12}$   | -0.00 | $F_{2,9,9,12}$   | 0.01  | $F_{3,9,9,12}$    | -0.00 | $F_{4,9,9,12}$    | -0.04 | $F_{5,9,9,12}$   | 0.02  |
| $F_{6,9,9,12}$   | -0.02 | $F_{7,9,9,12}$   | 0.12  | $F_{8,9,9,12}$    | 0.03  | $F_{9,9,9,12}$    | 0.99  | $F_{1,1,10,12}$  | 0.00  |
| $F_{1,2,10,12}$  | 0.00  | $F_{2,2,10,12}$  | -0.00 | $F_{1,3,10,12}$   | -0.00 | $F_{2,3,10,12}$   | -0.00 | $F_{3,3,10,12}$  | 0.00  |
| $F_{1,4,10,12}$  | -0.00 | $F_{2,4,10,12}$  | -0.00 | $F_{3,4,10,12}$   | 0.00  | $F_{4,4,10,12}$   | 0.01  | $F_{1,5,10,12}$  | 0.00  |
| $F_{2,5,10,12}$  | 0.00  | $F_{3,5,10,12}$  | 0.00  | $F_{4,5,10,12}$   | -0.00 | $F_{5,5,10,12}$   | -0.04 | $F_{1,6,10,12}$  | 0.00  |
| $F_{2,6,10,12}$  | 0.00  | $F_{3,6,10,12}$  | -0.00 | $F_{4,6,10,12}$   | 0.00  | $F_{5,6,10,12}$   | -0.00 | $F_{6,6,10,12}$  | -0.00 |
| $F_{1,7,10,12}$  | 0.00  | $F_{2,7,10,12}$  | 0.00  | $F_{3,7,10,12}$   | -0.00 | $F_{4,7,10,12}$   | -0.03 | $F_{5,7,10,12}$  | 0.02  |
| $F_{6,7,10,12}$  | -0.01 | $F_{7,7,10,12}$  | 2.29  | $F_{1,8,10,12}$   | -0.00 | $F_{2,8,10,12}$   | 0.00  | $F_{3,8,10,12}$  | -0.00 |
| $F_{4,8,10,12}$  | -0.01 | $F_{5,8,10,12}$  | 0.03  | $F_{6,8,10,12}$   | 0.00  | $F_{7,8,10,12}$   | -1.04 | $F_{8,8,10,12}$  | -0.28 |
| $F_{1,9,10,12}$  | -0.00 | $F_{2,9,10,12}$  | 0.00  | $F_{3,9,10,12}$   | -0.00 | $F_{4,9,10,12}$   | -0.01 | $F_{5,9,10,12}$  | -0.01 |

Table S10: The CcCR Force Constants for HOOH (cont.)

|                   |       |                   |       |                   |       |                   |       |                   |       |
|-------------------|-------|-------------------|-------|-------------------|-------|-------------------|-------|-------------------|-------|
| $F_{6,9,10,12}$   | 0.01  | $F_{7,9,10,12}$   | 1.63  | $F_{8,9,10,12}$   | -0.55 | $F_{9,9,10,12}$   | -0.07 | $F_{1,10,10,12}$  | -0.00 |
| $F_{2,10,10,12}$  | -0.00 | $F_{3,10,10,12}$  | 0.00  | $F_{4,10,10,12}$  | 0.01  | $F_{5,10,10,12}$  | -0.02 | $F_{6,10,10,12}$  | 0.01  |
| $F_{7,10,10,12}$  | -2.27 | $F_{8,10,10,12}$  | 1.06  | $F_{9,10,10,12}$  | -1.61 | $F_{10,10,10,12}$ | 2.25  | $F_{1,1,11,12}$   | 0.00  |
| $F_{1,2,11,12}$   | 0.00  | $F_{2,2,11,12}$   | -0.00 | $F_{1,3,11,12}$   | -0.00 | $F_{2,3,11,12}$   | -0.00 | $F_{3,3,11,12}$   | -0.00 |
| $F_{1,4,11,12}$   | 0.00  | $F_{2,4,11,12}$   | -0.00 | $F_{3,4,11,12}$   | 0.00  | $F_{4,4,11,12}$   | -0.01 | $F_{1,5,11,12}$   | -0.00 |
| $F_{2,5,11,12}$   | -0.00 | $F_{3,5,11,12}$   | 0.00  | $F_{4,5,11,12}$   | 0.03  | $F_{5,5,11,12}$   | -0.02 | $F_{1,6,11,12}$   | 0.00  |
| $F_{2,6,11,12}$   | 0.00  | $F_{3,6,11,12}$   | 0.00  | $F_{4,6,11,12}$   | -0.01 | $F_{5,6,11,12}$   | -0.01 | $F_{6,6,11,12}$   | -0.00 |
| $F_{1,7,11,12}$   | 0.00  | $F_{2,7,11,12}$   | 0.00  | $F_{3,7,11,12}$   | -0.00 | $F_{4,7,11,12}$   | -0.01 | $F_{5,7,11,12}$   | -0.03 |
| $F_{6,7,11,12}$   | 0.01  | $F_{7,7,11,12}$   | -1.01 | $F_{1,8,11,12}$   | -0.00 | $F_{2,8,11,12}$   | -0.00 | $F_{3,8,11,12}$   | 0.00  |
| $F_{4,8,11,12}$   | -0.00 | $F_{5,8,11,12}$   | -0.03 | $F_{6,8,11,12}$   | 0.01  | $F_{7,8,11,12}$   | -0.24 | $F_{8,8,11,12}$   | 0.49  |
| $F_{1,9,11,12}$   | 0.00  | $F_{2,9,11,12}$   | 0.00  | $F_{3,9,11,12}$   | 0.00  | $F_{4,9,11,12}$   | -0.00 | $F_{5,9,11,12}$   | 0.01  |
| $F_{6,9,11,12}$   | 0.03  | $F_{7,9,11,12}$   | -0.56 | $F_{8,9,11,12}$   | -0.15 | $F_{9,9,11,12}$   | -0.05 | $F_{1,10,11,12}$  | -0.00 |
| $F_{2,10,11,12}$  | -0.00 | $F_{3,10,11,12}$  | -0.00 | $F_{4,10,11,12}$  | 0.02  | $F_{5,10,11,12}$  | 0.00  | $F_{6,10,11,12}$  | -0.00 |
| $F_{7,10,11,12}$  | 1.02  | $F_{8,10,11,12}$  | 0.25  | $F_{9,10,11,12}$  | 0.56  | $F_{10,10,11,12}$ | -1.04 | $F_{1,11,11,12}$  | 0.00  |
| $F_{2,11,11,12}$  | 0.00  | $F_{3,11,11,12}$  | 0.00  | $F_{4,11,11,12}$  | -0.03 | $F_{5,11,11,12}$  | 0.05  | $F_{6,11,11,12}$  | -0.00 |
| $F_{7,11,11,12}$  | 0.27  | $F_{8,11,11,12}$  | -0.46 | $F_{9,11,11,12}$  | 0.14  | $F_{10,11,11,12}$ | -0.25 | $F_{11,11,11,12}$ | 0.40  |
| $F_{1,1,12,12}$   | -0.00 | $F_{1,2,12,12}$   | -0.00 | $F_{2,2,12,12}$   | 0.00  | $F_{1,3,12,12}$   | -0.00 | $F_{2,3,12,12}$   | 0.00  |
| $F_{3,3,12,12}$   | 0.00  | $F_{1,4,12,12}$   | 0.00  | $F_{2,4,12,12}$   | -0.00 | $F_{3,4,12,12}$   | 0.00  | $F_{4,4,12,12}$   | 0.01  |
| $F_{1,5,12,12}$   | 0.00  | $F_{2,5,12,12}$   | -0.00 | $F_{3,5,12,12}$   | -0.00 | $F_{4,5,12,12}$   | 0.00  | $F_{5,5,12,12}$   | -0.02 |
| $F_{1,6,12,12}$   | 0.00  | $F_{2,6,12,12}$   | 0.00  | $F_{3,6,12,12}$   | 0.00  | $F_{4,6,12,12}$   | -0.02 | $F_{5,6,12,12}$   | 0.00  |
| $F_{6,6,12,12}$   | -0.00 | $F_{1,7,12,12}$   | -0.00 | $F_{2,7,12,12}$   | 0.01  | $F_{3,7,12,12}$   | -0.00 | $F_{4,7,12,12}$   | -0.02 |
| $F_{5,7,12,12}$   | -0.01 | $F_{6,7,12,12}$   | 0.03  | $F_{7,7,12,12}$   | 1.63  | $F_{1,8,12,12}$   | 0.00  | $F_{2,8,12,12}$   | 0.01  |
| $F_{3,8,12,12}$   | 0.00  | $F_{4,8,12,12}$   | -0.01 | $F_{5,8,12,12}$   | 0.02  | $F_{6,8,12,12}$   | 0.02  | $F_{7,8,12,12}$   | -0.55 |
| $F_{8,8,12,12}$   | -0.16 | $F_{1,9,12,12}$   | 0.00  | $F_{2,9,12,12}$   | -0.00 | $F_{3,9,12,12}$   | 0.00  | $F_{4,9,12,12}$   | 0.02  |
| $F_{5,9,12,12}$   | -0.03 | $F_{6,9,12,12}$   | 0.01  | $F_{7,9,12,12}$   | -0.09 | $F_{8,9,12,12}$   | 0.02  | $F_{9,9,12,12}$   | -0.97 |
| $F_{1,10,12,12}$  | 0.00  | $F_{2,10,12,12}$  | -0.00 | $F_{3,10,12,12}$  | 0.00  | $F_{4,10,12,12}$  | 0.01  | $F_{5,10,12,12}$  | 0.01  |
| $F_{6,10,12,12}$  | -0.01 | $F_{7,10,12,12}$  | -1.62 | $F_{8,10,12,12}$  | 0.55  | $F_{9,10,12,12}$  | 0.07  | $F_{10,10,12,12}$ | 1.60  |
| $F_{1,11,12,12}$  | -0.00 | $F_{2,11,12,12}$  | -0.00 | $F_{3,11,12,12}$  | -0.00 | $F_{4,11,12,12}$  | 0.01  | $F_{5,11,12,12}$  | 0.01  |
| $F_{6,11,12,12}$  | -0.03 | $F_{7,11,12,12}$  | 0.55  | $F_{8,11,12,12}$  | 0.13  | $F_{9,11,12,12}$  | 0.02  | $F_{10,11,12,12}$ | -0.56 |
| $F_{11,11,12,12}$ | -0.13 | $F_{1,12,12,12}$  | -0.00 | $F_{2,12,12,12}$  | 0.00  | $F_{3,12,12,12}$  | -0.00 | $F_{4,12,12,12}$  | -0.00 |
| $F_{5,12,12,12}$  | 0.03  | $F_{6,12,12,12}$  | -0.00 | $F_{7,12,12,12}$  | 0.06  | $F_{8,12,12,12}$  | -0.04 | $F_{9,12,12,12}$  | 0.96  |
| $F_{10,12,12,12}$ | -0.06 | $F_{11,12,12,12}$ | 0.01  | $F_{12,12,12,12}$ | -0.95 |                   |       |                   |       |

Table S11: The CcCR Force Constants for HOSH (cont.)

|                |         |                |         |                |         |                |         |
|----------------|---------|----------------|---------|----------------|---------|----------------|---------|
| $F_{5,8,9}$    | -0.0240 | $F_{6,8,9}$    | 0.0387  | $F_{7,8,9}$    | 0.0057  | $F_{8,8,9}$    | 0.1844  |
| $F_{1,9,9}$    | 0.0039  | $F_{2,9,9}$    | 0.0017  | $F_{3,9,9}$    | 0.0481  | $F_{4,9,9}$    | -0.0045 |
| $F_{5,9,9}$    | 0.0457  | $F_{6,9,9}$    | 0.7295  | $F_{7,9,9}$    | 0.0020  | $F_{8,9,9}$    | -0.0133 |
| $F_{9,9,9}$    | -0.8199 | $F_{1,1,10}$   | 0.0006  | $F_{1,2,10}$   | 0.0020  | $F_{2,2,10}$   | -0.0007 |
| $F_{1,3,10}$   | -0.0004 | $F_{2,3,10}$   | 0.0002  | $F_{3,3,10}$   | 0.0000  | $F_{1,4,10}$   | -0.0010 |
| $F_{2,4,10}$   | -0.0032 | $F_{3,4,10}$   | 0.0008  | $F_{4,4,10}$   | 0.0012  | $F_{1,5,10}$   | -0.0022 |
| $F_{2,5,10}$   | 0.0026  | $F_{3,5,10}$   | -0.0010 | $F_{4,5,10}$   | -0.0062 | $F_{5,5,10}$   | -0.0050 |
| $F_{1,6,10}$   | 0.0002  | $F_{2,6,10}$   | 0.0036  | $F_{3,6,10}$   | -0.0000 | $F_{4,6,10}$   | 0.0055  |
| $F_{5,6,10}$   | -0.0052 | $F_{6,6,10}$   | 0.0021  | $F_{1,7,10}$   | 0.0004  | $F_{2,7,10}$   | 0.0016  |
| $F_{3,7,10}$   | -0.0006 | $F_{4,7,10}$   | 0.0000  | $F_{5,7,10}$   | 0.0098  | $F_{6,7,10}$   | -0.0072 |
| $F_{7,7,10}$   | -0.0032 | $F_{1,8,10}$   | 0.0004  | $F_{2,8,10}$   | -0.0027 | $F_{3,8,10}$   | 0.0017  |
| $F_{4,8,10}$   | 0.0127  | $F_{5,8,10}$   | 0.0033  | $F_{6,8,10}$   | 0.0016  | $F_{7,8,10}$   | -0.1155 |
| $F_{8,8,10}$   | 0.0077  | $F_{1,9,10}$   | -0.0001 | $F_{2,9,10}$   | -0.0053 | $F_{3,9,10}$   | 0.0023  |
| $F_{4,9,10}$   | 0.0059  | $F_{5,9,10}$   | 0.0076  | $F_{6,9,10}$   | -0.0025 | $F_{7,9,10}$   | 0.0120  |
| $F_{8,9,10}$   | -0.0047 | $F_{9,9,10}$   | -0.0015 | $F_{1,10,10}$  | 0.0001  | $F_{2,10,10}$  | -0.0004 |
| $F_{3,10,10}$  | 0.0002  | $F_{4,10,10}$  | -0.0002 | $F_{5,10,10}$  | -0.0014 | $F_{6,10,10}$  | 0.0015  |
| $F_{7,10,10}$  | 0.0027  | $F_{8,10,10}$  | 0.1024  | $F_{9,10,10}$  | -0.0178 | $F_{10,10,10}$ | -0.0026 |
| $F_{1,1,11}$   | 0.0000  | $F_{1,2,11}$   | -0.0005 | $F_{2,2,11}$   | -0.0008 | $F_{1,3,11}$   | 0.0001  |
| $F_{2,3,11}$   | -0.0008 | $F_{3,3,11}$   | 0.0011  | $F_{4,4,11}$   | 0.0001  | $F_{2,4,11}$   | 0.0003  |
| $F_{3,4,11}$   | 0.0002  | $F_{4,4,11}$   | -0.0012 | $F_{1,5,11}$   | 0.0007  | $F_{2,5,11}$   | 0.0009  |
| $F_{3,5,11}$   | 0.0003  | $F_{4,5,11}$   | -0.0009 | $F_{5,5,11}$   | 0.0007  | $F_{1,6,11}$   | -0.0015 |
| $F_{2,6,11}$   | -0.0002 | $F_{3,6,11}$   | -0.0009 | $F_{4,6,11}$   | 0.0010  | $F_{5,6,11}$   | 0.0049  |
| $F_{6,6,11}$   | 0.0142  | $F_{1,7,11}$   | 0.0001  | $F_{2,7,11}$   | -0.0006 | $F_{3,7,11}$   | 0.0007  |
| $F_{4,7,11}$   | 0.0044  | $F_{5,7,11}$   | 0.0011  | $F_{6,7,11}$   | 0.0005  | $F_{7,7,11}$   | -0.1087 |
| $F_{1,8,11}$   | -0.0015 | $F_{2,8,11}$   | -0.0007 | $F_{3,8,11}$   | 0.0006  | $F_{4,8,11}$   | 0.0016  |
| $F_{5,8,11}$   | -0.0066 | $F_{6,8,11}$   | 0.0088  | $F_{7,8,11}$   | 0.0082  | $F_{8,8,11}$   | 0.7203  |
| $F_{1,9,11}$   | 0.0009  | $F_{2,9,11}$   | 0.0001  | $F_{3,9,11}$   | 0.0007  | $F_{4,9,11}$   | -0.0002 |
| $F_{5,9,11}$   | -0.0176 | $F_{6,9,11}$   | -0.0104 | $F_{7,9,11}$   | -0.0031 | $F_{8,9,11}$   | -0.1481 |
| $F_{9,9,11}$   | -0.0342 | $F_{1,10,11}$  | -0.0002 | $F_{2,10,11}$  | 0.0008  | $F_{3,10,11}$  | -0.0009 |
| $F_{4,10,11}$  | -0.0034 | $F_{5,10,11}$  | -0.0009 | $F_{6,10,11}$  | 0.0001  | $F_{7,10,11}$  | 0.1042  |
| $F_{8,10,11}$  | -0.0083 | $F_{9,10,11}$  | 0.0024  | $F_{10,10,11}$ | -0.1006 | $F_{1,11,11}$  | 0.0013  |
| $F_{2,11,11}$  | 0.0005  | $F_{3,11,11}$  | -0.0002 | $F_{4,11,11}$  | -0.0010 | $F_{5,11,11}$  | 0.0049  |
| $F_{6,11,11}$  | -0.0136 | $F_{7,11,11}$  | -0.0087 | $F_{8,11,11}$  | -0.7131 | $F_{9,11,11}$  | 0.1657  |
| $F_{10,11,11}$ | 0.0084  | $F_{11,11,11}$ | 0.7077  | $F_{1,1,12}$   | 0.0015  | $F_{1,2,12}$   | 0.0017  |
| $F_{2,2,12}$   | 0.0011  | $F_{1,3,12}$   | -0.0002 | $F_{2,3,12}$   | -0.0033 | $F_{3,3,12}$   | -0.0016 |
| $F_{1,4,12}$   | -0.0016 | $F_{2,4,12}$   | -0.0024 | $F_{3,4,12}$   | -0.0008 | $F_{4,4,12}$   | 0.0054  |
| $F_{1,5,12}$   | -0.0013 | $F_{2,5,12}$   | -0.0013 | $F_{3,5,12}$   | 0.0051  | $F_{4,5,12}$   | 0.0014  |
| $F_{5,5,12}$   | 0.0014  | $F_{1,6,12}$   | 0.0013  | $F_{2,6,12}$   | 0.0030  | $F_{3,6,12}$   | 0.0011  |
| $F_{4,6,12}$   | 0.0007  | $F_{5,6,12}$   | 0.0264  | $F_{6,6,12}$   | -0.0333 | $F_{1,7,12}$   | -0.0001 |
| $F_{2,7,12}$   | -0.0008 | $F_{3,7,12}$   | 0.0033  | $F_{4,7,12}$   | 0.0084  | $F_{5,7,12}$   | 0.0012  |
| $F_{6,7,12}$   | -0.0024 | $F_{7,7,12}$   | -0.0041 | $F_{1,8,12}$   | -0.0010 | $F_{2,8,12}$   | -0.0007 |
| $F_{3,8,12}$   | -0.0010 | $F_{4,8,12}$   | 0.0019  | $F_{5,8,12}$   | -0.0124 | $F_{6,8,12}$   | -0.0264 |
| $F_{7,8,12}$   | -0.0024 | $F_{8,8,12}$   | -0.1256 | $F_{1,9,12}$   | -0.0020 | $F_{2,9,12}$   | 0.0007  |
| $F_{3,9,12}$   | -0.0004 | $F_{4,9,12}$   | 0.0019  | $F_{5,9,12}$   | -0.0170 | $F_{6,9,12}$   | 0.0038  |
| $F_{7,9,12}$   | -0.0015 | $F_{8,9,12}$   | -0.0276 | $F_{9,9,12}$   | 0.0423  | $F_{1,10,12}$  | 0.0002  |
| $F_{2,10,12}$  | 0.0015  | $F_{3,10,12}$  | -0.0023 | $F_{4,10,12}$  | -0.0122 | $F_{5,10,12}$  | -0.0013 |
| $F_{6,10,12}$  | 0.0004  | $F_{7,10,12}$  | -0.0042 | $F_{8,10,12}$  | 0.0014  | $F_{9,10,12}$  | 0.0017  |
| $F_{10,10,12}$ | 0.0161  | $F_{1,11,12}$  | 0.0006  | $F_{2,11,12}$  | 0.0009  | $F_{3,11,12}$  | -0.0009 |
| $F_{4,11,12}$  | -0.0009 | $F_{5,11,12}$  | 0.0123  | $F_{6,11,12}$  | -0.0029 | $F_{7,11,12}$  | 0.0020  |
| $F_{8,11,12}$  | 0.1387  | $F_{9,11,12}$  | 0.0439  | $F_{10,11,12}$ | -0.0016 | $F_{11,11,12}$ | -0.1519 |
| $F_{1,12,12}$  | 0.0010  | $F_{2,12,12}$  | -0.0004 | $F_{3,12,12}$  | 0.0008  | $F_{4,12,12}$  | -0.0019 |
| $F_{5,12,12}$  | -0.0146 | $F_{6,12,12}$  | 0.0284  | $F_{7,12,12}$  | 0.0007  | $F_{8,12,12}$  | 0.0550  |
| $F_{9,12,12}$  | -0.0457 | $F_{10,12,12}$ | 0.0002  | $F_{11,12,12}$ | -0.0401 | $F_{12,12,12}$ | 0.0165  |
| $F_{1,1,1,1}$  | 4.27    | $F_{1,1,1,2}$  | -0.12   | $F_{1,1,2,2}$  | -1.23   | $F_{1,2,2,2}$  | 0.06    |
| $F_{2,2,2,2}$  | 0.46    | $F_{1,1,1,3}$  | 2.75    | $F_{1,1,2,3}$  | -0.05   | $F_{1,2,2,3}$  | -0.47   |
| $F_{2,2,2,3}$  | 0.02    | $F_{1,1,3,3}$  | 0.11    | $F_{1,2,3,3}$  | -0.00   | $F_{2,2,3,3}$  | -0.04   |
| $F_{1,3,3,3}$  | -0.81   | $F_{2,3,3,3}$  | 0.01    | $F_{3,3,3,3}$  | -0.39   | $F_{1,1,1,4}$  | -4.29   |
| $F_{1,1,2,4}$  | 0.12    | $F_{1,2,2,4}$  | 1.24    | $F_{2,2,2,4}$  | -0.06   | $F_{1,1,3,4}$  | -2.76   |
| $F_{1,2,3,4}$  | 0.05    | $F_{2,2,3,4}$  | 0.45    | $F_{1,3,3,4}$  | -0.08   | $F_{2,3,3,4}$  | 0.00    |
| $F_{3,3,3,4}$  | 0.81    | $F_{1,1,4,4}$  | 4.31    | $F_{1,2,4,4}$  | -0.12   | $F_{2,2,4,4}$  | -1.26   |
| $F_{1,3,4,4}$  | 2.78    | $F_{2,3,4,4}$  | -0.06   | $F_{3,3,4,4}$  | 0.03    | $F_{1,4,4,4}$  | -4.32   |
| $F_{2,4,4,4}$  | 0.11    | $F_{3,4,4,4}$  | -2.84   | $F_{4,4,4,4}$  | 4.35    | $F_{1,1,1,5}$  | 0.12    |
| $F_{1,1,2,5}$  | 1.24    | $F_{1,2,2,5}$  | -0.06   | $F_{2,2,2,5}$  | -0.46   | $F_{1,1,3,5}$  | 0.05    |
| $F_{1,2,3,5}$  | 0.45    | $F_{2,2,3,5}$  | -0.02   | $F_{1,3,3,5}$  | 0.00    | $F_{2,3,3,5}$  | 0.02    |
| $F_{3,3,3,5}$  | -0.01   | $F_{1,1,4,5}$  | -0.12   | $F_{1,2,4,5}$  | -1.25   | $F_{2,2,4,5}$  | 0.06    |
| $F_{1,3,4,5}$  | -0.05   | $F_{2,3,4,5}$  | -0.44   | $F_{3,3,4,5}$  | -0.00   | $F_{1,4,4,5}$  | 0.12    |
| $F_{2,4,4,5}$  | 1.29    | $F_{3,4,4,5}$  | 0.05    | $F_{4,4,4,5}$  | -0.11   | $F_{1,1,5,5}$  | -1.24   |
| $F_{1,2,5,5}$  | 0.06    | $F_{2,2,5,5}$  | 0.48    | $F_{1,3,5,5}$  | -0.43   | $F_{2,3,5,5}$  | 0.02    |
| $F_{3,3,5,5}$  | -0.03   | $F_{1,4,5,5}$  | 1.26    | $F_{2,4,5,5}$  | -0.06   | $F_{3,4,5,5}$  | 0.41    |
| $F_{4,4,5,5}$  | -1.30   | $F_{1,5,5,5}$  | -0.07   | $F_{2,5,5,5}$  | -0.49   | $F_{3,5,5,5}$  | -0.03   |
| $F_{4,5,5,5}$  | 0.07    | $F_{5,5,5,5}$  | 0.53    | $F_{1,1,1,6}$  | -2.75   | $F_{1,1,2,6}$  | 0.06    |
| $F_{1,2,2,6}$  | 0.50    | $F_{2,2,2,6}$  | -0.02   | $F_{1,1,3,6}$  | -0.12   | $F_{1,2,3,6}$  | 0.00    |
| $F_{2,2,3,6}$  | 0.03    | $F_{1,3,3,6}$  | 0.86    | $F_{2,3,3,6}$  | -0.02   | $F_{3,3,3,6}$  | 0.44    |
| $F_{1,1,4,6}$  | 2.76    | $F_{1,2,4,6}$  | -0.06   | $F_{2,2,4,6}$  | -0.49   | $F_{1,3,4,6}$  | 0.09    |

Table S12: The CcCR Force Constants for HOSH (cont.)

|               |       |               |       |               |       |               |       |
|---------------|-------|---------------|-------|---------------|-------|---------------|-------|
| $F_{2,3,4,6}$ | -0.00 | $F_{3,3,4,6}$ | -0.84 | $F_{1,4,4,6}$ | -2.78 | $F_{2,4,4,6}$ | 0.06  |
| $F_{3,4,4,6}$ | -0.07 | $F_{4,4,4,6}$ | 2.83  | $F_{1,1,5,6}$ | -0.06 | $F_{1,2,5,6}$ | -0.48 |
| $F_{2,2,5,6}$ | 0.03  | $F_{1,3,5,6}$ | -0.00 | $F_{2,3,5,6}$ | -0.03 | $F_{3,3,5,6}$ | 0.02  |
| $F_{1,4,5,6}$ | 0.06  | $F_{2,4,5,6}$ | 0.47  | $F_{3,4,5,6}$ | 0.00  | $F_{4,4,5,6}$ | -0.05 |
| $F_{1,5,5,6}$ | 0.46  | $F_{2,5,5,6}$ | -0.04 | $F_{3,5,5,6}$ | 0.04  | $F_{4,5,5,6}$ | -0.43 |
| $F_{5,5,5,6}$ | 0.04  | $F_{1,1,6,6}$ | 0.08  | $F_{1,2,6,6}$ | 0.00  | $F_{2,2,6,6}$ | -0.03 |
| $F_{1,3,6,6}$ | -0.91 | $F_{2,3,6,6}$ | 0.02  | $F_{3,3,6,6}$ | -0.47 | $F_{1,4,6,6}$ | -0.08 |
| $F_{2,4,6,6}$ | 0.00  | $F_{3,4,6,6}$ | 0.89  | $F_{4,4,6,6}$ | -0.20 | $F_{1,5,6,6}$ | -0.00 |
| $F_{2,5,6,6}$ | 0.02  | $F_{3,5,6,6}$ | -0.02 | $F_{4,5,6,6}$ | -0.01 | $F_{5,5,6,6}$ | -0.25 |
| $F_{1,6,6,6}$ | 0.99  | $F_{2,6,6,6}$ | -0.03 | $F_{3,6,6,6}$ | 0.52  | $F_{4,6,6,6}$ | -1.06 |
| $F_{5,6,6,6}$ | 0.07  | $F_{6,6,6,6}$ | 1.25  | $F_{1,1,1,7}$ | 0.02  | $F_{1,1,2,7}$ | -0.00 |
| $F_{1,2,2,7}$ | -0.01 | $F_{2,2,2,7}$ | 0.01  | $F_{1,1,3,7}$ | 0.01  | $F_{1,2,3,7}$ | -0.01 |
| $F_{2,2,3,7}$ | 0.02  | $F_{1,3,3,7}$ | -0.03 | $F_{2,3,3,7}$ | -0.00 | $F_{3,3,3,7}$ | -0.00 |
| $F_{1,1,4,7}$ | -0.02 | $F_{1,2,4,7}$ | -0.00 | $F_{2,2,4,7}$ | 0.03  | $F_{1,3,4,7}$ | -0.02 |
| $F_{2,3,4,7}$ | 0.00  | $F_{3,3,4,7}$ | 0.04  | $F_{1,4,4,7}$ | 0.00  | $F_{2,4,4,7}$ | 0.01  |
| $F_{3,4,4,7}$ | 0.06  | $F_{4,4,4,7}$ | -0.03 | $F_{1,1,5,7}$ | 0.00  | $F_{1,2,5,7}$ | 0.02  |
| $F_{2,2,5,7}$ | -0.01 | $F_{1,3,5,7}$ | 0.01  | $F_{2,3,5,7}$ | -0.01 | $F_{3,3,5,7}$ | 0.00  |
| $F_{1,4,5,7}$ | 0.00  | $F_{2,4,5,7}$ | -0.03 | $F_{3,4,5,7}$ | -0.00 | $F_{4,4,5,7}$ | -0.01 |
| $F_{1,5,5,7}$ | -0.02 | $F_{2,5,5,7}$ | 0.01  | $F_{3,5,5,7}$ | 0.02  | $F_{4,5,5,7}$ | 0.04  |
| $F_{5,5,5,7}$ | -0.02 | $F_{1,1,6,7}$ | -0.01 | $F_{1,2,6,7}$ | 0.00  | $F_{2,2,6,7}$ | -0.01 |
| $F_{1,3,6,7}$ | 0.02  | $F_{2,3,6,7}$ | 0.01  | $F_{3,3,6,7}$ | -0.01 | $F_{1,4,6,7}$ | 0.02  |
| $F_{2,4,6,7}$ | 0.00  | $F_{3,4,6,7}$ | -0.02 | $F_{4,4,6,7}$ | -0.06 | $F_{1,5,6,7}$ | -0.00 |
| $F_{2,5,6,7}$ | 0.01  | $F_{3,5,6,7}$ | -0.01 | $F_{4,5,6,7}$ | 0.01  | $F_{5,5,6,7}$ | -0.02 |
| $F_{1,6,6,7}$ | -0.00 | $F_{2,6,6,7}$ | -0.01 | $F_{3,6,6,7}$ | 0.01  | $F_{4,6,6,7}$ | 0.26  |
| $F_{5,6,6,7}$ | 0.02  | $F_{6,6,6,7}$ | 0.07  | $F_{1,1,7,7}$ | -0.00 | $F_{1,2,7,7}$ | 0.01  |
| $F_{2,2,7,7}$ | -0.02 | $F_{1,3,7,7}$ | 0.02  | $F_{2,3,7,7}$ | 0.00  | $F_{3,3,7,7}$ | -0.01 |
| $F_{1,4,7,7}$ | 0.02  | $F_{2,4,7,7}$ | -0.01 | $F_{3,4,7,7}$ | -0.03 | $F_{4,4,7,7}$ | 0.02  |
| $F_{1,5,7,7}$ | -0.01 | $F_{2,5,7,7}$ | 0.02  | $F_{3,5,7,7}$ | -0.00 | $F_{4,5,7,7}$ | 0.01  |
| $F_{5,5,7,7}$ | -0.03 | $F_{1,6,7,7}$ | -0.02 | $F_{2,6,7,7}$ | -0.01 | $F_{3,6,7,7}$ | -0.01 |
| $F_{4,6,7,7}$ | 0.03  | $F_{5,6,7,7}$ | -0.01 | $F_{6,6,7,7}$ | -0.24 | $F_{1,7,7,7}$ | -0.02 |
| $F_{2,7,7,7}$ | 0.01  | $F_{3,7,7,7}$ | 0.01  | $F_{4,7,7,7}$ | -0.05 | $F_{5,7,7,7}$ | -0.01 |
| $F_{6,7,7,7}$ | -0.01 | $F_{7,7,7,7}$ | 0.21  | $F_{1,1,1,8}$ | 0.00  | $F_{1,1,2,8}$ | -0.01 |
| $F_{1,2,2,8}$ | 0.00  | $F_{2,2,2,8}$ | 0.00  | $F_{1,1,3,8}$ | -0.00 | $F_{1,2,3,8}$ | 0.02  |
| $F_{2,2,3,8}$ | -0.00 | $F_{1,3,3,8}$ | -0.00 | $F_{2,3,3,8}$ | 0.02  | $F_{3,3,3,8}$ | -0.01 |
| $F_{1,1,4,8}$ | -0.00 | $F_{1,2,4,8}$ | 0.01  | $F_{2,2,4,8}$ | -0.00 | $F_{1,3,4,8}$ | 0.00  |
| $F_{2,3,4,8}$ | -0.02 | $F_{3,3,4,8}$ | -0.00 | $F_{1,4,4,8}$ | 0.00  | $F_{2,4,4,8}$ | -0.02 |
| $F_{3,4,4,8}$ | -0.00 | $F_{4,4,4,8}$ | -0.00 | $F_{1,1,5,8}$ | -0.00 | $F_{1,2,5,8}$ | -0.01 |
| $F_{2,2,5,8}$ | -0.01 | $F_{1,3,5,8}$ | -0.02 | $F_{2,3,5,8}$ | 0.00  | $F_{3,3,5,8}$ | 0.01  |
| $F_{1,4,5,8}$ | -0.01 | $F_{2,4,5,8}$ | 0.01  | $F_{3,4,5,8}$ | 0.03  | $F_{4,4,5,8}$ | 0.01  |
| $F_{1,5,5,8}$ | 0.01  | $F_{2,5,5,8}$ | 0.01  | $F_{3,5,5,8}$ | 0.00  | $F_{4,5,5,8}$ | -0.01 |
| $F_{5,5,5,8}$ | -0.03 | $F_{1,1,6,8}$ | -0.00 | $F_{1,2,6,8}$ | -0.02 | $F_{2,2,6,8}$ | -0.00 |
| $F_{1,3,6,8}$ | 0.01  | $F_{2,3,6,8}$ | -0.01 | $F_{3,3,6,8}$ | 0.01  | $F_{1,4,6,8}$ | 0.01  |
| $F_{2,4,6,8}$ | 0.02  | $F_{3,4,6,8}$ | -0.00 | $F_{4,4,6,8}$ | -0.00 | $F_{1,5,6,8}$ | 0.02  |
| $F_{2,5,6,8}$ | 0.01  | $F_{3,5,6,8}$ | -0.00 | $F_{4,5,6,8}$ | -0.03 | $F_{5,5,6,8}$ | -0.00 |
| $F_{1,6,6,8}$ | -0.01 | $F_{2,6,6,8}$ | 0.02  | $F_{3,6,6,8}$ | -0.01 | $F_{4,6,6,8}$ | 0.01  |
| $F_{5,6,6,8}$ | 0.23  | $F_{6,6,6,8}$ | -0.07 | $F_{1,1,7,8}$ | 0.00  | $F_{1,2,7,8}$ | -0.01 |
| $F_{2,2,7,8}$ | 0.00  | $F_{1,3,7,8}$ | -0.00 | $F_{2,3,7,8}$ | -0.00 | $F_{3,3,7,8}$ | 0.00  |
| $F_{1,4,7,8}$ | -0.00 | $F_{2,4,7,8}$ | 0.01  | $F_{3,4,7,8}$ | 0.00  | $F_{4,4,7,8}$ | 0.01  |
| $F_{1,5,7,8}$ | 0.01  | $F_{2,5,7,8}$ | -0.00 | $F_{3,5,7,8}$ | -0.01 | $F_{4,5,7,8}$ | -0.01 |
| $F_{5,5,7,8}$ | 0.01  | $F_{1,6,7,8}$ | -0.00 | $F_{2,6,7,8}$ | 0.00  | $F_{3,6,7,8}$ | 0.00  |
| $F_{4,6,7,8}$ | -0.01 | $F_{5,6,7,8}$ | 0.01  | $F_{6,6,7,8}$ | -0.01 | $F_{1,7,7,8}$ | 0.00  |
| $F_{2,7,7,8}$ | -0.00 | $F_{3,7,7,8}$ | 0.00  | $F_{4,7,7,8}$ | -0.01 | $F_{5,7,7,8}$ | 0.02  |
| $F_{6,7,7,8}$ | 0.01  | $F_{7,7,7,8}$ | -0.00 | $F_{1,1,8,8}$ | 0.01  | $F_{1,2,8,8}$ | 0.01  |
| $F_{2,2,8,8}$ | 0.01  | $F_{1,3,8,8}$ | 0.01  | $F_{2,3,8,8}$ | -0.00 | $F_{3,3,8,8}$ | -0.03 |
| $F_{1,4,8,8}$ | -0.01 | $F_{2,4,8,8}$ | -0.01 | $F_{3,4,8,8}$ | -0.02 | $F_{4,4,8,8}$ | 0.02  |
| $F_{1,5,8,8}$ | -0.01 | $F_{2,5,8,8}$ | -0.00 | $F_{3,5,8,8}$ | 0.00  | $F_{4,5,8,8}$ | 0.01  |
| $F_{5,5,8,8}$ | 0.01  | $F_{1,6,8,8}$ | 0.00  | $F_{2,6,8,8}$ | -0.01 | $F_{3,6,8,8}$ | 0.01  |
| $F_{4,6,8,8}$ | 0.01  | $F_{5,6,8,8}$ | 0.01  | $F_{6,6,8,8}$ | -0.27 | $F_{1,7,8,8}$ | -0.01 |
| $F_{2,7,8,8}$ | -0.00 | $F_{3,7,8,8}$ | 0.01  | $F_{4,7,8,8}$ | 0.01  | $F_{5,7,8,8}$ | -0.00 |
| $F_{6,7,8,8}$ | -0.00 | $F_{7,7,8,8}$ | -0.40 | $F_{1,8,8,8}$ | 0.00  | $F_{2,8,8,8}$ | -0.01 |
| $F_{3,8,8,8}$ | -0.00 | $F_{4,8,8,8}$ | -0.01 | $F_{5,8,8,8}$ | -0.01 | $F_{6,8,8,8}$ | -0.01 |
| $F_{7,8,8,8}$ | 0.03  | $F_{8,8,8,8}$ | 1.60  | $F_{1,1,1,9}$ | 0.00  | $F_{1,1,2,9}$ | -0.00 |
| $F_{1,2,2,9}$ | -0.03 | $F_{2,2,2,9}$ | 0.01  | $F_{1,1,3,9}$ | 0.01  | $F_{1,2,3,9}$ | 0.00  |
| $F_{2,2,3,9}$ | 0.00  | $F_{1,3,3,9}$ | -0.05 | $F_{2,3,3,9}$ | 0.00  | $F_{3,3,3,9}$ | -0.04 |
| $F_{1,1,4,9}$ | 0.00  | $F_{1,2,4,9}$ | 0.01  | $F_{2,2,4,9}$ | 0.04  | $F_{1,3,4,9}$ | -0.02 |
| $F_{2,3,4,9}$ | -0.00 | $F_{3,3,4,9}$ | 0.03  | $F_{1,4,4,9}$ | -0.01 | $F_{2,4,4,9}$ | -0.00 |
| $F_{3,4,4,9}$ | 0.04  | $F_{4,4,4,9}$ | 0.01  | $F_{1,1,5,9}$ | 0.01  | $F_{1,2,5,9}$ | 0.03  |
| $F_{2,2,5,9}$ | -0.01 | $F_{1,3,5,9}$ | -0.00 | $F_{2,3,5,9}$ | 0.01  | $F_{3,3,5,9}$ | 0.00  |
| $F_{1,4,5,9}$ | -0.01 | $F_{2,4,5,9}$ | -0.03 | $F_{3,4,5,9}$ | 0.00  | $F_{4,4,5,9}$ | 0.02  |
| $F_{1,5,5,9}$ | -0.04 | $F_{2,5,5,9}$ | 0.02  | $F_{3,5,5,9}$ | -0.00 | $F_{4,5,5,9}$ | 0.03  |
| $F_{5,5,5,9}$ | -0.00 | $F_{1,1,6,9}$ | 0.04  | $F_{1,2,6,9}$ | -0.01 | $F_{2,2,6,9}$ | -0.01 |
| $F_{1,3,6,9}$ | 0.05  | $F_{2,3,6,9}$ | -0.00 | $F_{3,3,6,9}$ | 0.03  | $F_{1,4,6,9}$ | -0.02 |
| $F_{2,4,6,9}$ | 0.00  | $F_{3,4,6,9}$ | -0.04 | $F_{4,4,6,9}$ | 0.26  | $F_{1,5,6,9}$ | 0.01  |
| $F_{2,5,6,9}$ | 0.02  | $F_{3,5,6,9}$ | -0.00 | $F_{4,5,6,9}$ | -0.00 | $F_{5,5,6,9}$ | 0.21  |

Table S13: The CcCR Force Constants for HOSH (cont.)

|                 |       |                 |       |                 |       |                 |       |
|-----------------|-------|-----------------|-------|-----------------|-------|-----------------|-------|
| $F_{1,6,6,9}$   | -0.08 | $F_{2,6,6,9}$   | 0.00  | $F_{3,6,6,9}$   | -0.06 | $F_{4,6,6,9}$   | 0.16  |
| $F_{5,6,6,9}$   | -0.08 | $F_{6,6,6,9}$   | -1.74 | $F_{1,1,7,9}$   | -0.00 | $F_{1,2,7,9}$   | 0.00  |
| $F_{2,2,7,9}$   | -0.01 | $F_{1,3,7,9}$   | 0.01  | $F_{2,3,7,9}$   | -0.00 | $F_{3,3,7,9}$   | 0.02  |
| $F_{1,4,7,9}$   | 0.00  | $F_{2,4,7,9}$   | -0.01 | $F_{3,4,7,9}$   | -0.02 | $F_{4,4,7,9}$   | 0.00  |
| $F_{1,5,7,9}$   | -0.00 | $F_{2,5,7,9}$   | 0.01  | $F_{3,5,7,9}$   | 0.00  | $F_{4,5,7,9}$   | -0.01 |
| $F_{5,5,7,9}$   | -0.01 | $F_{1,6,7,9}$   | -0.02 | $F_{2,6,7,9}$   | 0.01  | $F_{3,6,7,9}$   | 0.00  |
| $F_{4,6,7,9}$   | -0.25 | $F_{5,6,7,9}$   | -0.02 | $F_{6,6,7,9}$   | -0.08 | $F_{1,7,7,9}$   | 0.00  |
| $F_{2,7,7,9}$   | 0.01  | $F_{3,7,7,9}$   | 0.01  | $F_{4,7,7,9}$   | -0.00 | $F_{5,7,7,9}$   | 0.03  |
| $F_{6,7,7,9}$   | 0.26  | $F_{7,7,7,9}$   | 0.00  | $F_{1,1,8,9}$   | 0.00  | $F_{1,2,8,9}$   | -0.00 |
| $F_{2,2,8,9}$   | 0.01  | $F_{1,3,8,9}$   | -0.00 | $F_{2,3,8,9}$   | -0.01 | $F_{3,3,8,9}$   | -0.01 |
| $F_{1,4,8,9}$   | -0.01 | $F_{2,4,8,9}$   | -0.01 | $F_{3,4,8,9}$   | 0.00  | $F_{4,4,8,9}$   | -0.01 |
| $F_{1,5,8,9}$   | 0.00  | $F_{2,5,8,9}$   | -0.01 | $F_{3,5,8,9}$   | -0.01 | $F_{4,5,8,9}$   | 0.00  |
| $F_{5,5,8,9}$   | -0.02 | $F_{1,6,8,9}$   | 0.00  | $F_{2,6,8,9}$   | -0.02 | $F_{3,6,8,9}$   | 0.01  |
| $F_{4,6,8,9}$   | -0.01 | $F_{5,6,8,9}$   | -0.22 | $F_{6,6,8,9}$   | 0.09  | $F_{1,7,8,9}$   | 0.00  |
| $F_{2,7,8,9}$   | -0.00 | $F_{3,7,8,9}$   | 0.00  | $F_{4,7,8,9}$   | 0.04  | $F_{5,7,8,9}$   | 0.01  |
| $F_{6,7,8,9}$   | 0.01  | $F_{7,7,8,9}$   | 0.01  | $F_{1,8,8,9}$   | -0.01 | $F_{2,8,8,9}$   | 0.01  |
| $F_{3,8,8,9}$   | 0.02  | $F_{4,8,8,9}$   | 0.01  | $F_{5,8,8,9}$   | 0.02  | $F_{6,8,8,9}$   | 0.24  |
| $F_{7,8,8,9}$   | -0.01 | $F_{8,8,8,9}$   | -0.47 | $F_{1,1,9,9}$   | -0.04 | $F_{1,2,9,9}$   | 0.01  |
| $F_{2,2,9,9}$   | 0.00  | $F_{1,3,9,9}$   | 0.01  | $F_{2,3,9,9}$   | 0.00  | $F_{3,3,9,9}$   | 0.01  |
| $F_{1,4,9,9}$   | 0.03  | $F_{2,4,9,9}$   | -0.00 | $F_{3,4,9,9}$   | 0.01  | $F_{4,4,9,9}$   | -0.31 |
| $F_{1,5,9,9}$   | -0.01 | $F_{2,5,9,9}$   | -0.03 | $F_{3,5,9,9}$   | -0.00 | $F_{4,5,9,9}$   | -0.00 |
| $F_{5,5,9,9}$   | -0.21 | $F_{1,6,9,9}$   | 0.04  | $F_{2,6,9,9}$   | 0.00  | $F_{3,6,9,9}$   | 0.03  |
| $F_{4,6,9,9}$   | -0.12 | $F_{5,6,9,9}$   | 0.10  | $F_{6,6,9,9}$   | 1.80  | $F_{1,7,9,9}$   | 0.01  |
| $F_{2,7,9,9}$   | -0.01 | $F_{3,7,9,9}$   | -0.02 | $F_{4,7,9,9}$   | 0.28  | $F_{5,7,9,9}$   | 0.02  |
| $F_{6,7,9,9}$   | 0.08  | $F_{7,7,9,9}$   | -0.27 | $F_{1,8,9,9}$   | -0.00 | $F_{2,8,9,9}$   | 0.03  |
| $F_{3,8,9,9}$   | -0.00 | $F_{4,8,9,9}$   | 0.01  | $F_{5,8,9,9}$   | 0.23  | $F_{6,8,9,9}$   | -0.12 |
| $F_{7,8,9,9}$   | -0.02 | $F_{8,8,9,9}$   | -0.47 | $F_{1,9,9,9}$   | -0.04 | $F_{2,9,9,9}$   | 0.00  |
| $F_{3,9,9,9}$   | -0.03 | $F_{4,9,9,9}$   | 0.11  | $F_{5,9,9,9}$   | -0.09 | $F_{6,9,9,9}$   | -1.83 |
| $F_{7,9,9,9}$   | -0.07 | $F_{8,9,9,9}$   | 0.30  | $F_{9,9,9,9}$   | 1.84  | $F_{1,1,1,10}$  | 0.00  |
| $F_{1,1,2,10}$  | 0.00  | $F_{1,2,2,10}$  | 0.00  | $F_{2,2,2,10}$  | -0.01 | $F_{1,1,3,10}$  | 0.00  |
| $F_{1,2,3,10}$  | 0.01  | $F_{2,2,3,10}$  | -0.00 | $F_{1,3,3,10}$  | -0.00 | $F_{2,3,3,10}$  | 0.00  |
| $F_{3,3,3,10}$  | 0.00  | $F_{1,1,4,10}$  | -0.00 | $F_{1,2,4,10}$  | 0.00  | $F_{2,2,4,10}$  | -0.00 |
| $F_{1,3,4,10}$  | -0.00 | $F_{2,3,4,10}$  | -0.00 | $F_{3,3,4,10}$  | 0.00  | $F_{1,4,4,10}$  | 0.00  |
| $F_{2,4,4,10}$  | -0.00 | $F_{3,4,4,10}$  | 0.00  | $F_{4,4,4,10}$  | -0.01 | $F_{1,1,5,10}$  | -0.00 |
| $F_{1,2,5,10}$  | -0.00 | $F_{2,2,5,10}$  | 0.01  | $F_{1,3,5,10}$  | -0.01 | $F_{2,3,5,10}$  | -0.00 |
| $F_{3,3,5,10}$  | -0.00 | $F_{1,4,5,10}$  | -0.00 | $F_{2,4,5,10}$  | 0.00  | $F_{3,4,5,10}$  | 0.00  |
| $F_{4,4,5,10}$  | 0.01  | $F_{1,5,5,10}$  | 0.00  | $F_{2,5,5,10}$  | -0.01 | $F_{3,5,5,10}$  | 0.00  |
| $F_{4,5,5,10}$  | -0.00 | $F_{5,5,5,10}$  | 0.01  | $F_{1,1,6,10}$  | 0.00  | $F_{1,2,6,10}$  | -0.00 |
| $F_{2,2,6,10}$  | -0.00 | $F_{1,3,6,10}$  | 0.00  | $F_{2,3,6,10}$  | -0.00 | $F_{3,3,6,10}$  | -0.00 |
| $F_{1,4,6,10}$  | -0.00 | $F_{2,4,6,10}$  | -0.00 | $F_{3,4,6,10}$  | -0.00 | $F_{4,4,6,10}$  | 0.00  |
| $F_{1,5,6,10}$  | 0.00  | $F_{2,5,6,10}$  | 0.01  | $F_{3,5,6,10}$  | 0.00  | $F_{4,5,6,10}$  | -0.01 |
| $F_{5,5,6,10}$  | -0.01 | $F_{1,6,6,10}$  | 0.00  | $F_{2,6,6,10}$  | 0.01  | $F_{3,6,6,10}$  | 0.01  |
| $F_{4,6,6,10}$  | 0.01  | $F_{5,6,6,10}$  | -0.01 | $F_{6,6,6,10}$  | -0.01 | $F_{1,1,7,10}$  | 0.00  |
| $F_{1,2,7,10}$  | -0.00 | $F_{2,2,7,10}$  | 0.00  | $F_{1,3,7,10}$  | -0.00 | $F_{2,3,7,10}$  | -0.00 |
| $F_{3,3,7,10}$  | -0.00 | $F_{1,4,7,10}$  | -0.00 | $F_{2,4,7,10}$  | 0.01  | $F_{3,4,7,10}$  | 0.00  |
| $F_{4,4,7,10}$  | 0.00  | $F_{1,5,7,10}$  | 0.00  | $F_{2,5,7,10}$  | -0.00 | $F_{3,5,7,10}$  | 0.00  |
| $F_{4,5,7,10}$  | -0.01 | $F_{5,5,7,10}$  | 0.01  | $F_{1,6,7,10}$  | 0.00  | $F_{2,6,7,10}$  | 0.00  |
| $F_{3,6,7,10}$  | 0.00  | $F_{4,6,7,10}$  | 0.00  | $F_{5,6,7,10}$  | 0.00  | $F_{6,6,7,10}$  | -0.02 |
| $F_{1,7,7,10}$  | 0.01  | $F_{2,7,7,10}$  | -0.01 | $F_{3,7,7,10}$  | 0.00  | $F_{4,7,7,10}$  | 0.01  |
| $F_{5,7,7,10}$  | 0.01  | $F_{6,7,7,10}$  | -0.01 | $F_{7,7,7,10}$  | -0.14 | $F_{1,1,8,10}$  | 0.00  |
| $F_{1,2,8,10}$  | 0.00  | $F_{2,2,8,10}$  | -0.00 | $F_{1,3,8,10}$  | 0.00  | $F_{2,3,8,10}$  | 0.00  |
| $F_{3,3,8,10}$  | 0.00  | $F_{1,4,8,10}$  | 0.00  | $F_{2,4,8,10}$  | -0.00 | $F_{3,4,8,10}$  | -0.00 |
| $F_{4,4,8,10}$  | -0.00 | $F_{1,5,8,10}$  | -0.00 | $F_{2,5,8,10}$  | 0.00  | $F_{3,5,8,10}$  | -0.00 |
| $F_{4,5,8,10}$  | 0.01  | $F_{5,5,8,10}$  | -0.00 | $F_{1,6,8,10}$  | -0.00 | $F_{2,6,8,10}$  | -0.00 |
| $F_{3,6,8,10}$  | -0.00 | $F_{4,6,8,10}$  | 0.01  | $F_{5,6,8,10}$  | 0.01  | $F_{6,6,8,10}$  | 0.01  |
| $F_{1,7,8,10}$  | -0.00 | $F_{2,7,8,10}$  | 0.00  | $F_{3,7,8,10}$  | -0.00 | $F_{4,7,8,10}$  | 0.01  |
| $F_{5,7,8,10}$  | -0.02 | $F_{6,7,8,10}$  | 0.00  | $F_{7,7,8,10}$  | 0.01  | $F_{1,8,8,10}$  | 0.00  |
| $F_{2,8,8,10}$  | 0.00  | $F_{3,8,8,10}$  | -0.00 | $F_{4,8,8,10}$  | -0.02 | $F_{5,8,8,10}$  | 0.00  |
| $F_{6,8,8,10}$  | -0.01 | $F_{7,8,8,10}$  | 0.40  | $F_{8,8,8,10}$  | -0.03 | $F_{1,1,9,10}$  | -0.00 |
| $F_{1,2,9,10}$  | -0.00 | $F_{2,2,9,10}$  | 0.00  | $F_{1,3,9,10}$  | 0.00  | $F_{2,3,9,10}$  | 0.00  |
| $F_{3,3,9,10}$  | 0.00  | $F_{1,4,9,10}$  | 0.00  | $F_{2,4,9,10}$  | 0.01  | $F_{3,4,9,10}$  | -0.00 |
| $F_{4,4,9,10}$  | -0.00 | $F_{1,5,9,10}$  | 0.00  | $F_{2,5,9,10}$  | -0.01 | $F_{3,5,9,10}$  | -0.00 |
| $F_{4,5,9,10}$  | 0.00  | $F_{5,5,9,10}$  | 0.01  | $F_{1,6,9,10}$  | -0.00 | $F_{2,6,9,10}$  | -0.01 |
| $F_{3,6,9,10}$  | -0.00 | $F_{4,6,9,10}$  | 0.00  | $F_{5,6,9,10}$  | 0.01  | $F_{6,6,9,10}$  | 0.00  |
| $F_{1,7,9,10}$  | -0.00 | $F_{2,7,9,10}$  | -0.00 | $F_{3,7,9,10}$  | -0.00 | $F_{4,7,9,10}$  | -0.00 |
| $F_{5,7,9,10}$  | -0.01 | $F_{6,7,9,10}$  | 0.00  | $F_{7,7,9,10}$  | -0.00 | $F_{1,8,9,10}$  | 0.00  |
| $F_{2,8,9,10}$  | 0.01  | $F_{3,8,9,10}$  | 0.00  | $F_{4,8,9,10}$  | -0.02 | $F_{5,8,9,10}$  | -0.01 |
| $F_{6,8,9,10}$  | -0.01 | $F_{7,8,9,10}$  | -0.05 | $F_{8,8,9,10}$  | 0.01  | $F_{1,9,9,10}$  | 0.00  |
| $F_{2,9,9,10}$  | 0.01  | $F_{3,9,9,10}$  | -0.00 | $F_{4,9,9,10}$  | -0.01 | $F_{5,9,9,10}$  | -0.01 |
| $F_{6,9,9,10}$  | -0.00 | $F_{7,9,9,10}$  | -0.01 | $F_{8,9,9,10}$  | 0.01  | $F_{9,9,9,10}$  | 0.00  |
| $F_{1,1,10,10}$ | -0.00 | $F_{1,2,10,10}$ | 0.00  | $F_{2,2,10,10}$ | -0.00 | $F_{1,3,10,10}$ | 0.00  |
| $F_{2,3,10,10}$ | -0.00 | $F_{3,3,10,10}$ | 0.00  | $F_{1,4,10,10}$ | 0.00  | $F_{2,4,10,10}$ | -0.00 |
| $F_{3,4,10,10}$ | -0.00 | $F_{4,4,10,10}$ | 0.00  | $F_{1,5,10,10}$ | -0.00 | $F_{2,5,10,10}$ | 0.00  |
| $F_{3,5,10,10}$ | -0.00 | $F_{4,5,10,10}$ | 0.00  | $F_{5,5,10,10}$ | -0.01 | $F_{1,6,10,10}$ | -0.00 |

Table S14: The CcCR Force Constants for HOSH (cont.)

|                  |       |                  |       |                   |       |                  |       |
|------------------|-------|------------------|-------|-------------------|-------|------------------|-------|
| $F_{2,6,10,10}$  | -0.00 | $F_{3,6,10,10}$  | -0.00 | $F_{4,6,10,10}$   | 0.00  | $F_{5,6,10,10}$  | 0.01  |
| $F_{6,6,10,10}$  | -0.00 | $F_{1,7,10,10}$  | -0.00 | $F_{2,7,10,10}$   | 0.00  | $F_{3,7,10,10}$  | -0.00 |
| $F_{4,7,10,10}$  | -0.01 | $F_{5,7,10,10}$  | -0.00 | $F_{6,7,10,10}$   | 0.00  | $F_{7,7,10,10}$  | 0.13  |
| $F_{1,8,10,10}$  | 0.00  | $F_{2,8,10,10}$  | -0.00 | $F_{3,8,10,10}$   | -0.00 | $F_{4,8,10,10}$  | -0.00 |
| $F_{5,8,10,10}$  | 0.01  | $F_{6,8,10,10}$  | -0.01 | $F_{7,8,10,10}$   | -0.01 | $F_{8,8,10,10}$  | -0.38 |
| $F_{1,9,10,10}$  | -0.00 | $F_{2,9,10,10}$  | 0.00  | $F_{3,9,10,10}$   | 0.00  | $F_{4,9,10,10}$  | 0.00  |
| $F_{5,9,10,10}$  | 0.00  | $F_{6,9,10,10}$  | -0.00 | $F_{7,9,10,10}$   | 0.00  | $F_{8,9,10,10}$  | 0.07  |
| $F_{9,9,10,10}$  | 0.02  | $F_{1,10,10,10}$ | 0.00  | $F_{2,10,10,10}$  | -0.00 | $F_{3,10,10,10}$ | 0.00  |
| $F_{4,10,10,10}$ | 0.00  | $F_{5,10,10,10}$ | 0.00  | $F_{6,10,10,10}$  | -0.00 | $F_{7,10,10,10}$ | -0.12 |
| $F_{8,10,10,10}$ | 0.01  | $F_{9,10,10,10}$ | -0.00 | $F_{10,10,10,10}$ | 0.12  | $F_{1,1,1,11}$   | -0.00 |
| $F_{1,1,2,11}$   | -0.00 | $F_{1,2,2,11}$   | -0.00 | $F_{2,2,2,11}$    | 0.00  | $F_{1,1,3,11}$   | 0.00  |
| $F_{1,2,3,11}$   | -0.00 | $F_{2,2,3,11}$   | 0.00  | $F_{1,3,3,11}$    | 0.00  | $F_{2,3,3,11}$   | -0.00 |
| $F_{3,3,3,11}$   | 0.00  | $F_{1,1,4,11}$   | 0.00  | $F_{1,2,4,11}$    | 0.00  | $F_{2,2,4,11}$   | 0.00  |
| $F_{1,3,4,11}$   | -0.00 | $F_{2,3,4,11}$   | 0.00  | $F_{3,3,4,11}$    | 0.00  | $F_{1,4,4,11}$   | -0.00 |
| $F_{2,4,4,11}$   | -0.00 | $F_{3,4,4,11}$   | 0.00  | $F_{4,4,4,11}$    | 0.01  | $F_{1,1,5,11}$   | 0.00  |
| $F_{1,2,5,11}$   | 0.01  | $F_{2,2,5,11}$   | -0.00 | $F_{1,3,5,11}$    | 0.00  | $F_{2,3,5,11}$   | -0.00 |
| $F_{3,3,5,11}$   | 0.00  | $F_{1,4,5,11}$   | -0.00 | $F_{2,4,5,11}$    | -0.01 | $F_{3,4,5,11}$   | -0.00 |
| $F_{4,4,5,11}$   | -0.00 | $F_{1,5,5,11}$   | -0.01 | $F_{2,5,5,11}$    | 0.00  | $F_{3,5,5,11}$   | 0.00  |
| $F_{4,5,5,11}$   | 0.01  | $F_{5,5,5,11}$   | -0.01 | $F_{1,1,6,11}$    | 0.00  | $F_{1,2,6,11}$   | 0.00  |
| $F_{2,2,6,11}$   | -0.00 | $F_{1,3,6,11}$   | -0.01 | $F_{2,3,6,11}$    | 0.00  | $F_{3,3,6,11}$   | -0.01 |
| $F_{1,4,6,11}$   | -0.00 | $F_{2,4,6,11}$   | 0.00  | $F_{3,4,6,11}$    | 0.00  | $F_{4,4,6,11}$   | 0.00  |
| $F_{1,5,6,11}$   | 0.00  | $F_{2,5,6,11}$   | 0.00  | $F_{3,5,6,11}$    | -0.00 | $F_{4,5,6,11}$   | -0.00 |
| $F_{5,5,6,11}$   | -0.00 | $F_{1,6,6,11}$   | 0.01  | $F_{2,6,6,11}$    | -0.01 | $F_{3,6,6,11}$   | 0.01  |
| $F_{4,6,6,11}$   | -0.01 | $F_{5,6,6,11}$   | 0.00  | $F_{6,6,6,11}$    | 0.03  | $F_{1,1,7,11}$   | -0.00 |
| $F_{1,2,7,11}$   | 0.00  | $F_{2,2,7,11}$   | -0.00 | $F_{1,3,7,11}$    | 0.00  | $F_{2,3,7,11}$   | -0.00 |
| $F_{3,3,7,11}$   | -0.00 | $F_{1,4,7,11}$   | 0.00  | $F_{2,4,7,11}$    | -0.00 | $F_{3,4,7,11}$   | -0.00 |
| $F_{4,4,7,11}$   | -0.00 | $F_{1,5,7,11}$   | -0.00 | $F_{2,5,7,11}$    | 0.00  | $F_{3,5,7,11}$   | 0.00  |
| $F_{4,5,7,11}$   | 0.01  | $F_{5,5,7,11}$   | -0.00 | $F_{1,6,7,11}$    | 0.00  | $F_{2,6,7,11}$   | -0.00 |
| $F_{3,6,7,11}$   | -0.00 | $F_{4,6,7,11}$   | 0.00  | $F_{5,6,7,11}$    | 0.00  | $F_{6,6,7,11}$   | 0.00  |
| $F_{1,7,7,11}$   | -0.00 | $F_{2,7,7,11}$   | 0.00  | $F_{3,7,7,11}$    | 0.00  | $F_{4,7,7,11}$   | 0.00  |
| $F_{5,7,7,11}$   | -0.02 | $F_{6,7,7,11}$   | 0.01  | $F_{7,7,7,11}$    | 0.01  | $F_{1,1,8,11}$   | -0.00 |
| $F_{1,2,8,11}$   | -0.00 | $F_{2,2,8,11}$   | 0.00  | $F_{1,3,8,11}$    | 0.00  | $F_{2,3,8,11}$   | 0.00  |
| $F_{3,3,8,11}$   | 0.00  | $F_{1,4,8,11}$   | 0.00  | $F_{2,4,8,11}$    | 0.00  | $F_{3,4,8,11}$   | 0.00  |
| $F_{4,4,8,11}$   | -0.01 | $F_{1,5,8,11}$   | 0.00  | $F_{2,5,8,11}$    | -0.00 | $F_{3,5,8,11}$   | -0.00 |
| $F_{4,5,8,11}$   | -0.01 | $F_{5,5,8,11}$   | 0.01  | $F_{1,6,8,11}$    | -0.00 | $F_{2,6,8,11}$   | 0.00  |
| $F_{3,6,8,11}$   | 0.00  | $F_{4,6,8,11}$   | 0.00  | $F_{5,6,8,11}$    | -0.01 | $F_{6,6,8,11}$   | 0.02  |
| $F_{1,7,8,11}$   | 0.00  | $F_{2,7,8,11}$   | 0.00  | $F_{3,7,8,11}$    | -0.00 | $F_{4,7,8,11}$   | -0.01 |
| $F_{5,7,8,11}$   | 0.00  | $F_{6,7,8,11}$   | -0.00 | $F_{7,7,8,11}$    | 0.39  | $F_{1,8,8,11}$   | -0.00 |
| $F_{2,8,8,11}$   | 0.00  | $F_{3,8,8,11}$   | 0.00  | $F_{4,8,8,11}$    | 0.00  | $F_{5,8,8,11}$   | -0.01 |
| $F_{6,8,8,11}$   | 0.01  | $F_{7,8,8,11}$   | -0.03 | $F_{8,8,8,11}$    | -1.58 | $F_{1,1,9,11}$   | -0.01 |
| $F_{1,2,9,11}$   | -0.00 | $F_{2,2,9,11}$   | -0.00 | $F_{1,3,9,11}$    | 0.00  | $F_{2,3,9,11}$   | -0.00 |
| $F_{3,3,9,11}$   | 0.00  | $F_{1,4,9,11}$   | 0.01  | $F_{2,4,9,11}$    | 0.00  | $F_{3,4,9,11}$   | -0.00 |
| $F_{4,4,9,11}$   | -0.01 | $F_{1,5,9,11}$   | 0.00  | $F_{2,5,9,11}$    | 0.00  | $F_{3,5,9,11}$   | -0.00 |
| $F_{4,5,9,11}$   | 0.00  | $F_{5,5,9,11}$   | -0.00 | $F_{1,6,9,11}$    | -0.00 | $F_{2,6,9,11}$   | 0.00  |
| $F_{3,6,9,11}$   | -0.00 | $F_{4,6,9,11}$   | 0.00  | $F_{5,6,9,11}$    | -0.01 | $F_{6,6,9,11}$   | -0.01 |
| $F_{1,7,9,11}$   | -0.00 | $F_{2,7,9,11}$   | 0.00  | $F_{3,7,9,11}$    | -0.00 | $F_{4,7,9,11}$   | -0.01 |
| $F_{5,7,9,11}$   | -0.00 | $F_{6,7,9,11}$   | -0.00 | $F_{7,7,9,11}$    | -0.05 | $F_{1,8,9,11}$   | 0.00  |
| $F_{2,8,9,11}$   | -0.00 | $F_{3,8,9,11}$   | -0.00 | $F_{4,8,9,11}$    | -0.00 | $F_{5,8,9,11}$   | 0.01  |
| $F_{6,8,9,11}$   | -0.00 | $F_{7,8,9,11}$   | 0.01  | $F_{8,8,9,11}$    | 0.45  | $F_{1,9,9,11}$   | 0.00  |
| $F_{2,9,9,11}$   | -0.00 | $F_{3,9,9,11}$   | 0.00  | $F_{4,9,9,11}$    | -0.00 | $F_{5,9,9,11}$   | 0.01  |
| $F_{6,9,9,11}$   | 0.02  | $F_{7,9,9,11}$   | 0.00  | $F_{8,9,9,11}$    | 0.21  | $F_{9,9,9,11}$   | -0.21 |
| $F_{1,1,10,11}$  | -0.00 | $F_{1,2,10,11}$  | -0.00 | $F_{2,2,10,11}$   | 0.00  | $F_{1,3,10,11}$  | -0.00 |
| $F_{2,3,10,11}$  | 0.00  | $F_{3,3,10,11}$  | -0.00 | $F_{1,4,10,11}$   | -0.00 | $F_{2,4,10,11}$  | 0.00  |
| $F_{3,4,10,11}$  | 0.00  | $F_{4,4,10,11}$  | 0.00  | $F_{1,5,10,11}$   | 0.00  | $F_{2,5,10,11}$  | -0.00 |
| $F_{3,5,10,11}$  | -0.00 | $F_{4,5,10,11}$  | -0.01 | $F_{5,5,10,11}$   | -0.00 | $F_{1,6,10,11}$  | 0.00  |
| $F_{2,6,10,11}$  | 0.00  | $F_{3,6,10,11}$  | 0.00  | $F_{4,6,10,11}$   | 0.00  | $F_{5,6,10,11}$  | -0.00 |
| $F_{6,6,10,11}$  | -0.00 | $F_{1,7,10,11}$  | 0.00  | $F_{2,7,10,11}$   | -0.00 | $F_{3,7,10,11}$  | -0.00 |
| $F_{4,7,10,11}$  | -0.00 | $F_{5,7,10,11}$  | 0.01  | $F_{6,7,10,11}$   | -0.01 | $F_{7,7,10,11}$  | -0.01 |
| $F_{1,8,10,11}$  | -0.00 | $F_{2,8,10,11}$  | -0.00 | $F_{3,8,10,11}$   | 0.00  | $F_{4,8,10,11}$  | 0.01  |
| $F_{5,8,10,11}$  | 0.00  | $F_{6,8,10,11}$  | 0.00  | $F_{7,8,10,11}$   | -0.38 | $F_{8,8,10,11}$  | 0.03  |
| $F_{1,9,10,11}$  | -0.00 | $F_{2,9,10,11}$  | -0.00 | $F_{3,9,10,11}$   | 0.00  | $F_{4,9,10,11}$  | 0.01  |
| $F_{5,9,10,11}$  | 0.00  | $F_{6,9,10,11}$  | 0.00  | $F_{7,9,10,11}$   | 0.07  | $F_{8,9,10,11}$  | -0.01 |
| $F_{9,9,10,11}$  | -0.00 | $F_{1,10,10,11}$ | -0.00 | $F_{2,10,10,11}$  | 0.00  | $F_{3,10,10,11}$ | 0.00  |
| $F_{4,10,10,11}$ | 0.00  | $F_{5,10,10,11}$ | -0.00 | $F_{6,10,10,11}$  | 0.01  | $F_{7,10,10,11}$ | 0.01  |
| $F_{8,10,10,11}$ | 0.37  | $F_{9,10,10,11}$ | -0.08 | $F_{10,10,10,11}$ | -0.01 | $F_{1,1,11,11}$  | 0.00  |
| $F_{1,2,11,11}$  | 0.00  | $F_{2,2,11,11}$  | -0.00 | $F_{1,3,11,11}$   | -0.00 | $F_{2,3,11,11}$  | 0.00  |
| $F_{3,3,11,11}$  | -0.00 | $F_{1,4,11,11}$  | -0.00 | $F_{2,4,11,11}$   | -0.00 | $F_{3,4,11,11}$  | -0.00 |
| $F_{4,4,11,11}$  | 0.01  | $F_{1,5,11,11}$  | -0.00 | $F_{2,5,11,11}$   | 0.00  | $F_{3,5,11,11}$  | 0.00  |
| $F_{4,5,11,11}$  | 0.00  | $F_{5,5,11,11}$  | -0.00 | $F_{1,6,11,11}$   | 0.00  | $F_{2,6,11,11}$  | -0.00 |
| $F_{3,6,11,11}$  | -0.00 | $F_{4,6,11,11}$  | -0.00 | $F_{5,6,11,11}$   | 0.01  | $F_{6,6,11,11}$  | -0.01 |
| $F_{1,7,11,11}$  | -0.00 | $F_{2,7,11,11}$  | -0.00 | $F_{3,7,11,11}$   | 0.00  | $F_{4,7,11,11}$  | 0.00  |
| $F_{5,7,11,11}$  | 0.00  | $F_{6,7,11,11}$  | 0.00  | $F_{7,7,11,11}$   | -0.37 | $F_{1,8,11,11}$  | 0.00  |
| $F_{2,8,11,11}$  | -0.00 | $F_{3,8,11,11}$  | -0.00 | $F_{4,8,11,11}$   | -0.00 | $F_{5,8,11,11}$  | 0.00  |
| $F_{6,8,11,11}$  | -0.00 | $F_{7,8,11,11}$  | 0.03  | $F_{8,8,11,11}$   | 1.59  | $F_{1,9,11,11}$  | -0.00 |

Table S15: The CcCR Force Constants for HOSH (cont.)

|                   |       |                   |       |                  |       |                   |       |
|-------------------|-------|-------------------|-------|------------------|-------|-------------------|-------|
| $F_{2,9,11,11}$   | 0.00  | $F_{3,9,11,11}$   | 0.00  | $F_{4,9,11,11}$  | 0.00  | $F_{5,9,11,11}$   | -0.02 |
| $F_{6,9,11,11}$   | 0.01  | $F_{7,9,11,11}$   | -0.01 | $F_{8,9,11,11}$  | -0.46 | $F_{9,9,11,11}$   | -0.23 |
| $F_{1,10,11,11}$  | 0.00  | $F_{2,10,11,11}$  | 0.00  | $F_{3,10,11,11}$ | -0.00 | $F_{4,10,11,11}$  | -0.01 |
| $F_{5,10,11,11}$  | -0.00 | $F_{6,10,11,11}$  | -0.00 | $F_{7,10,11,11}$ | 0.37  | $F_{8,10,11,11}$  | -0.03 |
| $F_{9,10,11,11}$  | 0.01  | $F_{10,10,11,11}$ | -0.36 | $F_{1,11,11,11}$ | -0.00 | $F_{2,11,11,11}$  | 0.00  |
| $F_{3,11,11,11}$  | 0.00  | $F_{4,11,11,11}$  | 0.00  | $F_{5,11,11,11}$ | -0.00 | $F_{6,11,11,11}$  | -0.00 |
| $F_{7,11,11,11}$  | -0.03 | $F_{8,11,11,11}$  | -1.59 | $F_{9,11,11,11}$ | 0.48  | $F_{10,11,11,11}$ | 0.03  |
| $F_{11,11,11,11}$ | 1.59  | $F_{1,1,1,12}$    | 0.00  | $F_{1,1,2,12}$   | 0.00  | $F_{1,2,2,12}$    | 0.00  |
| $F_{2,2,2,12}$    | -0.00 | $F_{1,1,3,12}$    | -0.00 | $F_{1,2,3,12}$   | -0.00 | $F_{2,2,3,12}$    | -0.00 |
| $F_{1,3,3,12}$    | -0.00 | $F_{2,3,3,12}$    | -0.00 | $F_{3,3,3,12}$   | 0.00  | $F_{1,1,4,12}$    | -0.00 |
| $F_{1,2,4,12}$    | -0.00 | $F_{2,2,4,12}$    | -0.00 | $F_{1,3,4,12}$   | 0.00  | $F_{2,3,4,12}$    | 0.00  |
| $F_{3,3,4,12}$    | 0.00  | $F_{1,4,4,12}$    | 0.00  | $F_{2,4,4,12}$   | 0.00  | $F_{3,4,4,12}$    | -0.00 |
| $F_{4,4,4,12}$    | -0.00 | $F_{1,1,5,12}$    | -0.00 | $F_{1,2,5,12}$   | 0.00  | $F_{2,2,5,12}$    | 0.00  |
| $F_{1,3,5,12}$    | 0.00  | $F_{2,3,5,12}$    | 0.00  | $F_{3,3,5,12}$   | -0.00 | $F_{1,4,5,12}$    | 0.00  |
| $F_{2,4,5,12}$    | 0.00  | $F_{3,4,5,12}$    | -0.01 | $F_{4,4,5,12}$   | -0.02 | $F_{1,5,5,12}$    | -0.00 |
| $F_{2,5,5,12}$    | -0.01 | $F_{3,5,5,12}$    | -0.00 | $F_{4,5,5,12}$   | -0.00 | $F_{5,5,5,12}$    | -0.02 |
| $F_{1,1,6,12}$    | 0.00  | $F_{1,2,6,12}$    | 0.00  | $F_{2,2,6,12}$   | 0.00  | $F_{1,3,6,12}$    | 0.00  |
| $F_{2,3,6,12}$    | -0.00 | $F_{3,3,6,12}$    | -0.00 | $F_{1,4,6,12}$   | -0.00 | $F_{2,4,6,12}$    | -0.00 |
| $F_{3,4,6,12}$    | -0.00 | $F_{4,4,6,12}$    | 0.01  | $F_{1,5,6,12}$   | -0.00 | $F_{2,5,6,12}$    | -0.01 |
| $F_{3,5,6,12}$    | 0.00  | $F_{4,5,6,12}$    | 0.00  | $F_{5,5,6,12}$   | 0.01  | $F_{1,6,6,12}$    | -0.00 |
| $F_{2,6,6,12}$    | 0.00  | $F_{3,6,6,12}$    | 0.00  | $F_{4,6,6,12}$   | 0.01  | $F_{5,6,6,12}$    | 0.03  |
| $F_{6,6,6,12}$    | -0.03 | $F_{1,1,7,12}$    | -0.00 | $F_{1,2,7,12}$   | -0.00 | $F_{2,2,7,12}$    | 0.00  |
| $F_{1,3,7,12}$    | 0.00  | $F_{2,3,7,12}$    | -0.00 | $F_{3,3,7,12}$   | -0.00 | $F_{1,4,7,12}$    | 0.00  |
| $F_{2,4,7,12}$    | 0.00  | $F_{3,4,7,12}$    | -0.00 | $F_{4,4,7,12}$   | -0.00 | $F_{1,5,7,12}$    | -0.00 |
| $F_{2,5,7,12}$    | -0.00 | $F_{3,5,7,12}$    | 0.00  | $F_{4,5,7,12}$   | 0.01  | $F_{5,5,7,12}$    | 0.01  |
| $F_{1,6,7,12}$    | -0.00 | $F_{2,6,7,12}$    | -0.00 | $F_{3,6,7,12}$   | 0.00  | $F_{4,6,7,12}$    | 0.00  |
| $F_{5,6,7,12}$    | 0.01  | $F_{6,6,7,12}$    | -0.00 | $F_{1,7,7,12}$   | -0.00 | $F_{2,7,7,12}$    | -0.00 |
| $F_{3,7,7,12}$    | 0.00  | $F_{4,7,7,12}$    | 0.00  | $F_{5,7,7,12}$   | -0.02 | $F_{6,7,7,12}$    | -0.01 |
| $F_{7,7,7,12}$    | -0.00 | $F_{1,1,8,12}$    | -0.00 | $F_{1,2,8,12}$   | -0.00 | $F_{2,2,8,12}$    | -0.00 |
| $F_{1,3,8,12}$    | -0.00 | $F_{2,3,8,12}$    | 0.00  | $F_{3,3,8,12}$   | 0.00  | $F_{1,4,8,12}$    | 0.00  |
| $F_{2,4,8,12}$    | 0.00  | $F_{3,4,8,12}$    | 0.00  | $F_{4,4,8,12}$   | 0.01  | $F_{1,5,8,12}$    | 0.00  |
| $F_{2,5,8,12}$    | 0.00  | $F_{3,5,8,12}$    | -0.00 | $F_{4,5,8,12}$   | -0.00 | $F_{5,5,8,12}$    | 0.02  |
| $F_{1,6,8,12}$    | -0.00 | $F_{2,6,8,12}$    | 0.00  | $F_{3,6,8,12}$   | -0.01 | $F_{4,6,8,12}$    | -0.00 |
| $F_{5,6,8,12}$    | -0.01 | $F_{6,6,8,12}$    | -0.01 | $F_{1,7,8,12}$   | 0.00  | $F_{2,7,8,12}$    | 0.00  |
| $F_{3,7,8,12}$    | -0.00 | $F_{4,7,8,12}$    | -0.02 | $F_{5,7,8,12}$   | -0.00 | $F_{6,7,8,12}$    | 0.00  |
| $F_{7,7,8,12}$    | -0.03 | $F_{1,8,8,12}$    | -0.00 | $F_{2,8,8,12}$   | 0.00  | $F_{3,8,8,12}$    | 0.00  |
| $F_{4,8,8,12}$    | 0.00  | $F_{5,8,8,12}$    | -0.02 | $F_{6,8,8,12}$   | 0.03  | $F_{7,8,8,12}$    | 0.00  |
| $F_{8,8,8,12}$    | 0.49  | $F_{1,1,9,12}$    | -0.00 | $F_{1,2,9,12}$   | -0.00 | $F_{2,2,9,12}$    | -0.00 |
| $F_{1,3,9,12}$    | -0.00 | $F_{2,3,9,12}$    | 0.00  | $F_{3,3,9,12}$   | 0.00  | $F_{1,4,9,12}$    | 0.00  |
| $F_{2,4,9,12}$    | -0.00 | $F_{3,4,9,12}$    | 0.00  | $F_{4,4,9,12}$   | 0.01  | $F_{1,5,9,12}$    | 0.00  |
| $F_{2,5,9,12}$    | 0.00  | $F_{3,5,9,12}$    | 0.00  | $F_{4,5,9,12}$   | 0.00  | $F_{5,5,9,12}$    | 0.00  |
| $F_{1,6,9,12}$    | 0.00  | $F_{2,6,9,12}$    | 0.00  | $F_{3,6,9,12}$   | -0.00 | $F_{4,6,9,12}$    | -0.00 |
| $F_{5,6,9,12}$    | -0.02 | $F_{6,6,9,12}$    | 0.00  | $F_{1,7,9,12}$   | 0.00  | $F_{2,7,9,12}$    | 0.00  |
| $F_{3,7,9,12}$    | -0.00 | $F_{4,7,9,12}$    | -0.01 | $F_{5,7,9,12}$   | -0.01 | $F_{6,7,9,12}$    | -0.00 |
| $F_{7,7,9,12}$    | -0.00 | $F_{1,8,9,12}$    | 0.00  | $F_{2,8,9,12}$   | -0.00 | $F_{3,8,9,12}$    | 0.00  |
| $F_{4,8,9,12}$    | -0.00 | $F_{5,8,9,12}$    | -0.00 | $F_{6,8,9,12}$   | 0.02  | $F_{7,8,9,12}$    | 0.01  |
| $F_{8,8,9,12}$    | 0.22  | $F_{1,9,9,12}$    | -0.00 | $F_{2,9,9,12}$   | -0.00 | $F_{3,9,9,12}$    | -0.01 |
| $F_{4,9,9,12}$    | -0.00 | $F_{5,9,9,12}$    | -0.01 | $F_{6,9,9,12}$   | -0.00 | $F_{7,9,9,12}$    | 0.00  |
| $F_{8,9,9,12}$    | -0.18 | $F_{9,9,9,12}$    | 0.02  | $F_{1,1,10,12}$  | 0.00  | $F_{1,2,10,12}$   | 0.00  |
| $F_{2,2,10,12}$   | 0.00  | $F_{1,3,10,12}$   | -0.00 | $F_{2,3,10,12}$  | -0.00 | $F_{3,3,10,12}$   | 0.00  |
| $F_{1,4,10,12}$   | -0.00 | $F_{2,4,10,12}$   | -0.00 | $F_{3,4,10,12}$  | 0.00  | $F_{4,4,10,12}$   | 0.00  |
| $F_{1,5,10,12}$   | -0.00 | $F_{2,5,10,12}$   | 0.00  | $F_{3,5,10,12}$  | 0.00  | $F_{4,5,10,12}$   | 0.00  |
| $F_{5,5,10,12}$   | -0.00 | $F_{1,6,10,12}$   | 0.00  | $F_{2,6,10,12}$  | 0.00  | $F_{3,6,10,12}$   | -0.00 |
| $F_{4,6,10,12}$   | -0.01 | $F_{5,6,10,12}$   | -0.01 | $F_{6,6,10,12}$  | -0.00 | $F_{1,7,10,12}$   | 0.00  |
| $F_{2,7,10,12}$   | 0.00  | $F_{3,7,10,12}$   | 0.00  | $F_{4,7,10,12}$  | -0.00 | $F_{5,7,10,12}$   | 0.01  |
| $F_{6,7,10,12}$   | 0.01  | $F_{7,7,10,12}$   | 0.00  | $F_{1,8,10,12}$  | -0.00 | $F_{2,8,10,12}$   | -0.00 |
| $F_{3,8,10,12}$   | 0.00  | $F_{4,8,10,12}$   | 0.01  | $F_{5,8,10,12}$  | 0.00  | $F_{6,8,10,12}$   | 0.00  |
| $F_{7,8,10,12}$   | 0.05  | $F_{8,8,10,12}$   | -0.00 | $F_{1,9,10,12}$  | -0.00 | $F_{2,9,10,12}$   | -0.00 |
| $F_{3,9,10,12}$   | 0.00  | $F_{4,9,10,12}$   | 0.01  | $F_{5,9,10,12}$  | 0.00  | $F_{6,9,10,12}$   | 0.00  |
| $F_{7,9,10,12}$   | 0.01  | $F_{8,9,10,12}$   | -0.00 | $F_{9,9,10,12}$  | -0.00 | $F_{1,10,10,12}$  | -0.00 |
| $F_{2,10,10,12}$  | -0.00 | $F_{3,10,10,12}$  | -0.00 | $F_{4,10,10,12}$ | -0.00 | $F_{5,10,10,12}$  | -0.01 |
| $F_{6,10,10,12}$  | 0.00  | $F_{7,10,10,12}$  | -0.00 | $F_{8,10,10,12}$ | -0.06 | $F_{9,10,10,12}$  | -0.02 |
| $F_{10,10,10,12}$ | 0.00  | $F_{1,1,11,12}$   | 0.00  | $F_{1,2,11,12}$  | 0.00  | $F_{2,2,11,12}$   | 0.00  |
| $F_{1,3,11,12}$   | -0.00 | $F_{2,3,11,12}$   | -0.00 | $F_{3,3,11,12}$  | -0.00 | $F_{1,4,11,12}$   | -0.00 |
| $F_{2,4,11,12}$   | -0.00 | $F_{3,4,11,12}$   | -0.00 | $F_{4,4,11,12}$  | 0.00  | $F_{1,5,11,12}$   | -0.00 |
| $F_{2,5,11,12}$   | -0.00 | $F_{3,5,11,12}$   | 0.00  | $F_{4,5,11,12}$  | 0.00  | $F_{5,5,11,12}$   | -0.00 |
| $F_{1,6,11,12}$   | 0.00  | $F_{2,6,11,12}$   | 0.00  | $F_{3,6,11,12}$  | 0.00  | $F_{4,6,11,12}$   | 0.00  |
| $F_{5,6,11,12}$   | 0.01  | $F_{6,6,11,12}$   | -0.03 | $F_{1,7,11,12}$  | -0.00 | $F_{2,7,11,12}$   | -0.00 |
| $F_{3,7,11,12}$   | 0.00  | $F_{4,7,11,12}$   | 0.01  | $F_{5,7,11,12}$  | 0.00  | $F_{6,7,11,12}$   | -0.00 |
| $F_{7,7,11,12}$   | 0.05  | $F_{1,8,11,12}$   | -0.00 | $F_{2,8,11,12}$  | -0.00 | $F_{3,8,11,12}$   | -0.00 |
| $F_{4,8,11,12}$   | 0.00  | $F_{5,8,11,12}$   | -0.00 | $F_{6,8,11,12}$  | -0.02 | $F_{7,8,11,12}$   | -0.01 |
| $F_{8,8,11,12}$   | -0.47 | $F_{1,9,11,12}$   | -0.00 | $F_{2,9,11,12}$  | -0.00 | $F_{3,9,11,12}$   | -0.00 |
| $F_{4,9,11,12}$   | 0.00  | $F_{5,9,11,12}$   | -0.00 | $F_{6,9,11,12}$  | -0.00 | $F_{7,9,11,12}$   | -0.00 |
| $F_{8,9,11,12}$   | -0.21 | $F_{9,9,11,12}$   | 0.19  | $F_{1,10,11,12}$ | 0.00  | $F_{2,10,11,12}$  | 0.00  |

Table S16: The CcCR Force Constants for HOSH (cont.)

|                   |       |                   |       |                   |       |                   |       |
|-------------------|-------|-------------------|-------|-------------------|-------|-------------------|-------|
| $F_{3,10,11,12}$  | -0.00 | $F_{4,10,11,12}$  | -0.01 | $F_{5,10,11,12}$  | -0.00 | $F_{6,10,11,12}$  | 0.00  |
| $F_{7,10,11,12}$  | -0.06 | $F_{8,10,11,12}$  | 0.01  | $F_{9,10,11,12}$  | 0.00  | $F_{10,10,11,12}$ | 0.07  |
| $F_{1,11,11,12}$  | -0.00 | $F_{2,11,11,12}$  | 0.00  | $F_{3,11,11,12}$  | 0.00  | $F_{4,11,11,12}$  | 0.00  |
| $F_{5,11,11,12}$  | 0.00  | $F_{6,11,11,12}$  | 0.01  | $F_{7,11,11,12}$  | 0.01  | $F_{8,11,11,12}$  | 0.47  |
| $F_{9,11,11,12}$  | 0.22  | $F_{10,11,11,12}$ | -0.01 | $F_{11,11,11,12}$ | -0.47 | $F_{1,1,12,12}$   | -0.00 |
| $F_{1,2,12,12}$   | 0.00  | $F_{2,2,12,12}$   | -0.00 | $F_{1,3,12,12}$   | 0.00  | $F_{2,3,12,12}$   | 0.00  |
| $F_{3,3,12,12}$   | -0.00 | $F_{1,4,12,12}$   | 0.00  | $F_{2,4,12,12}$   | 0.00  | $F_{3,4,12,12}$   | -0.00 |
| $F_{4,4,12,12}$   | -0.02 | $F_{1,5,12,12}$   | -0.00 | $F_{2,5,12,12}$   | 0.00  | $F_{3,5,12,12}$   | -0.00 |
| $F_{4,5,12,12}$   | 0.00  | $F_{5,5,12,12}$   | -0.01 | $F_{1,6,12,12}$   | -0.00 | $F_{2,6,12,12}$   | -0.00 |
| $F_{3,6,12,12}$   | -0.00 | $F_{4,6,12,12}$   | -0.00 | $F_{5,6,12,12}$   | -0.02 | $F_{6,6,12,12}$   | 0.02  |
| $F_{1,7,12,12}$   | -0.00 | $F_{2,7,12,12}$   | -0.00 | $F_{3,7,12,12}$   | 0.00  | $F_{4,7,12,12}$   | 0.01  |
| $F_{5,7,12,12}$   | 0.00  | $F_{6,7,12,12}$   | 0.00  | $F_{7,7,12,12}$   | 0.01  | $F_{1,8,12,12}$   | 0.00  |
| $F_{2,8,12,12}$   | -0.00 | $F_{3,8,12,12}$   | -0.00 | $F_{4,8,12,12}$   | -0.00 | $F_{5,8,12,12}$   | 0.02  |
| $F_{6,8,12,12}$   | -0.01 | $F_{7,8,12,12}$   | -0.00 | $F_{8,8,12,12}$   | -0.25 | $F_{1,9,12,12}$   | 0.00  |
| $F_{2,9,12,12}$   | 0.00  | $F_{3,9,12,12}$   | 0.00  | $F_{4,9,12,12}$   | 0.00  | $F_{5,9,12,12}$   | 0.02  |
| $F_{6,9,12,12}$   | 0.00  | $F_{7,9,12,12}$   | -0.00 | $F_{8,9,12,12}$   | 0.16  | $F_{9,9,12,12}$   | -0.02 |
| $F_{1,10,12,12}$  | 0.00  | $F_{2,10,12,12}$  | -0.00 | $F_{3,10,12,12}$  | 0.00  | $F_{4,10,12,12}$  | 0.01  |
| $F_{5,10,12,12}$  | 0.00  | $F_{6,10,12,12}$  | -0.00 | $F_{7,10,12,12}$  | -0.02 | $F_{8,10,12,12}$  | 0.00  |
| $F_{9,10,12,12}$  | -0.00 | $F_{10,10,12,12}$ | 0.02  | $F_{1,11,12,12}$  | 0.00  | $F_{2,11,12,12}$  | 0.00  |
| $F_{3,11,12,12}$  | 0.00  | $F_{4,11,12,12}$  | -0.00 | $F_{5,11,12,12}$  | -0.01 | $F_{6,11,12,12}$  | 0.03  |
| $F_{7,11,12,12}$  | 0.00  | $F_{8,11,12,12}$  | 0.23  | $F_{9,11,12,12}$  | -0.18 | $F_{10,11,12,12}$ | -0.00 |
| $F_{11,11,12,12}$ | -0.22 | $F_{1,12,12,12}$  | -0.00 | $F_{2,12,12,12}$  | -0.00 | $F_{3,12,12,12}$  | 0.00  |
| $F_{4,12,12,12}$  | 0.00  | $F_{5,12,12,12}$  | -0.01 | $F_{6,12,12,12}$  | -0.02 | $F_{7,12,12,12}$  | -0.00 |
| $F_{8,12,12,12}$  | -0.15 | $F_{9,12,12,12}$  | 0.01  | $F_{10,12,12,12}$ | 0.00  | $F_{11,12,12,12}$ | 0.16  |
| $F_{12,12,12,12}$ | 0.01  |                   |       |                   |       |                   |       |



Table S17: The CcCR Force Constants for HSSH

|             |           |             |           |             |           |             |           |
|-------------|-----------|-------------|-----------|-------------|-----------|-------------|-----------|
| $F_{1,1}$   | 0.035389  | $F_{1,2}$   | 0.025097  | $F_{1,3}$   | -0.024657 | $F_{1,4}$   | -0.020648 |
| $F_{1,5}$   | -0.012017 | $F_{1,6}$   | 0.011507  | $F_{1,7}$   | -0.014332 | $F_{1,8}$   | -0.012646 |
| $F_{1,9}$   | 0.012252  | $F_{1,10}$  | -0.000408 | $F_{1,11}$  | -0.000435 | $F_{1,12}$  | 0.000898  |
| $F_{1,13}$  | 0.025097  | $F_{2,1}$   | 0.132705  | $F_{2,2}$   | -0.128366 | $F_{2,3}$   | -0.025124 |
| $F_{2,4}$   | -0.135663 | $F_{2,5}$   | 0.131307  | $F_{2,6}$   | 0.000462  | $F_{2,7}$   | 0.004713  |
| $F_{2,8}$   | -0.004840 | $F_{2,9}$   | -0.000435 | $F_{2,10}$  | -0.001755 | $F_{2,11}$  | 0.001899  |
| $F_{2,12}$  | -0.024657 | $F_{2,13}$  | -0.128366 | $F_{3,1}$   | 0.131327  | $F_{3,2}$   | 0.024639  |
| $F_{3,3}$   | 0.131267  | $F_{3,4}$   | -0.133790 | $F_{3,5}$   | 0.000916  | $F_{3,6}$   | -0.001001 |
| $F_{3,7}$   | 0.000755  | $F_{3,8}$   | -0.000898 | $F_{3,9}$   | -0.001899 | $F_{3,10}$  | 0.001708  |
| $F_{3,11}$  | -0.020648 | $F_{3,12}$  | -0.025124 | $F_{3,13}$  | 0.024639  | $F_{4,1}$   | 0.189553  |
| $F_{4,2}$   | 0.019266  | $F_{4,3}$   | -0.011489 | $F_{4,4}$   | -0.154572 | $F_{4,5}$   | 0.005396  |
| $F_{4,6}$   | -0.012234 | $F_{4,7}$   | -0.014332 | $F_{4,8}$   | 0.000462  | $F_{4,9}$   | -0.000916 |
| $F_{4,10}$  | -0.012017 | $F_{4,11}$  | -0.135663 | $F_{4,12}$  | 0.131267  | $F_{4,13}$  | 0.019266  |
| $F_{5,1}$   | 0.150976  | $F_{5,2}$   | -0.134207 | $F_{5,3}$   | 0.005396  | $F_{5,4}$   | -0.020025 |
| $F_{5,5}$   | 0.001939  | $F_{5,6}$   | -0.012646 | $F_{5,7}$   | 0.004713  | $F_{5,8}$   | 0.001001  |
| $F_{5,9}$   | 0.011507  | $F_{5,10}$  | 0.131307  | $F_{5,11}$  | -0.133790 | $F_{5,12}$  | -0.011489 |
| $F_{5,13}$  | -0.134207 | $F_{6,1}$   | 0.148767  | $F_{6,2}$   | 0.012234  | $F_{6,3}$   | -0.001939 |
| $F_{6,4}$   | -0.015732 | $F_{6,5}$   | -0.012252 | $F_{6,6}$   | 0.004840  | $F_{6,7}$   | 0.000755  |
| $F_{6,8}$   | -0.014332 | $F_{6,9}$   | 0.000462  | $F_{6,10}$  | 0.000916  | $F_{6,11}$  | -0.154572 |
| $F_{6,12}$  | 0.005396  | $F_{6,13}$  | 0.012234  | $F_{7,1}$   | 0.189553  | $F_{7,2}$   | 0.019266  |
| $F_{7,3}$   | 0.011489  | $F_{7,4}$   | -0.020648 | $F_{7,5}$   | -0.025124 | $F_{7,6}$   | -0.024639 |
| $F_{7,7}$   | -0.012646 | $F_{7,8}$   | 0.004713  | $F_{7,9}$   | -0.001001 | $F_{7,10}$  | 0.005396  |
| $F_{7,11}$  | -0.020025 | $F_{7,12}$  | -0.001939 | $F_{7,13}$  | 0.019266  | $F_{8,1}$   | 0.150976  |
| $F_{8,2}$   | 0.134207  | $F_{8,3}$   | -0.012017 | $F_{8,4}$   | -0.135663 | $F_{8,5}$   | -0.131267 |
| $F_{8,6}$   | 0.012252  | $F_{8,7}$   | -0.004840 | $F_{8,8}$   | 0.000755  | $F_{8,9}$   | -0.012234 |
| $F_{8,10}$  | 0.001939  | $F_{8,11}$  | -0.015732 | $F_{8,12}$  | 0.011489  | $F_{8,13}$  | 0.134207  |
| $F_{9,1}$   | 0.148767  | $F_{9,2}$   | -0.011507 | $F_{9,3}$   | -0.131307 | $F_{9,4}$   | -0.133790 |
| $F_{9,5}$   | -0.000408 | $F_{9,6}$   | -0.000435 | $F_{9,7}$   | -0.000898 | $F_{9,8}$   | -0.014332 |
| $F_{9,9}$   | -0.012646 | $F_{9,10}$  | -0.012252 | $F_{9,11}$  | -0.020648 | $F_{9,12}$  | -0.012017 |
| $F_{9,13}$  | -0.011507 | $F_{10,1}$  | 0.035389  | $F_{10,2}$  | 0.025097  | $F_{10,3}$  | 0.024657  |
| $F_{10,4}$  | -0.000435 | $F_{10,5}$  | -0.001755 | $F_{10,6}$  | -0.001899 | $F_{10,7}$  | 0.000462  |
| $F_{10,8}$  | 0.004713  | $F_{10,9}$  | 0.004840  | $F_{10,10}$ | -0.025124 | $F_{10,11}$ | -0.135663 |
| $F_{10,12}$ | -0.131307 | $F_{10,13}$ | 0.025097  | $F_{11,1}$  | 0.132705  | $F_{11,2}$  | 0.128366  |
| $F_{11,3}$  | 0.000898  | $F_{11,4}$  | 0.001899  | $F_{11,5}$  | 0.001708  | $F_{11,6}$  | -0.000916 |
| $F_{11,7}$  | 0.001001  | $F_{11,8}$  | 0.000755  | $F_{11,9}$  | -0.024639 | $F_{11,10}$ | -0.131267 |
| $F_{11,11}$ | -0.133790 | $F_{11,12}$ | 0.024657  | $F_{11,13}$ | 0.128366  | $F_{12,1}$  | 0.131327  |
| $F_{1,1,1}$ | 0.0248    | $F_{1,1,2}$ | 0.0380    | $F_{1,2,2}$ | -0.0661   | $F_{2,2,2}$ | -0.1493   |
| $F_{1,1,3}$ | -0.0370   | $F_{1,2,3}$ | 0.0812    | $F_{2,2,3}$ | 0.2918    | $F_{1,3,3}$ | -0.0651   |
| $F_{2,3,3}$ | -0.2902   | $F_{3,3,3}$ | 0.1459    | $F_{1,1,4}$ | -0.0440   | $F_{1,2,4}$ | -0.0369   |
| $F_{2,2,4}$ | 0.0696    | $F_{1,3,4}$ | 0.0367    | $F_{2,3,4}$ | -0.0888   | $F_{3,3,4}$ | 0.0692    |
| $F_{1,4,4}$ | 0.0372    | $F_{2,4,4}$ | 0.0303    | $F_{3,4,4}$ | -0.0301   | $F_{4,4,4}$ | -0.4571   |
| $F_{1,1,5}$ | -0.0433   | $F_{1,2,5}$ | 0.0659    | $F_{2,2,5}$ | 0.1483    | $F_{1,3,5}$ | -0.0731   |
| $F_{2,3,5}$ | -0.2924   | $F_{3,3,5}$ | 0.2925    | $F_{1,4,5}$ | 0.0308    | $F_{2,4,5}$ | -0.0642   |
| $F_{3,4,5}$ | 0.0805    | $F_{4,4,5}$ | -0.0238   | $F_{1,5,5}$ | -0.0636   | $F_{2,5,5}$ | -0.1442   |
| $F_{3,5,5}$ | 0.2968    | $F_{4,5,5}$ | 0.0899    | $F_{5,5,5}$ | 0.1407    | $F_{1,1,6}$ | 0.0423    |
| $F_{1,2,6}$ | -0.0736   | $F_{2,2,6}$ | -0.2935   | $F_{1,3,6}$ | 0.0651    | $F_{2,3,6}$ | 0.2914    |
| $F_{3,3,6}$ | -0.1441   | $F_{1,4,6}$ | -0.0297   | $F_{2,4,6}$ | 0.0807    | $F_{3,4,6}$ | -0.0655   |
| $F_{4,4,6}$ | 0.0110    | $F_{1,5,6}$ | 0.0659    | $F_{2,5,6}$ | 0.2944    | $F_{3,5,6}$ | -0.2939   |
| $F_{4,5,6}$ | -0.0728   | $F_{5,5,6}$ | -0.2991   | $F_{1,6,6}$ | -0.0631   | $F_{2,6,6}$ | -0.2962   |
| $F_{3,6,6}$ | 0.1387    | $F_{4,6,6}$ | 0.0919    | $F_{5,6,6}$ | 0.3005    | $F_{6,6,6}$ | -0.1296   |
| $F_{1,1,7}$ | 0.0186    | $F_{1,2,7}$ | -0.0001   | $F_{2,2,7}$ | -0.0034   | $F_{1,3,7}$ | 0.0021    |
| $F_{2,3,7}$ | 0.0080    | $F_{3,3,7}$ | -0.0027   | $F_{1,4,7}$ | 0.0074    | $F_{2,4,7}$ | 0.0057    |
| $F_{3,4,7}$ | -0.0086   | $F_{4,4,7}$ | 0.3933    | $F_{1,5,7}$ | 0.0105    | $F_{2,5,7}$ | -0.0017   |
| $F_{3,5,7}$ | -0.0073   | $F_{4,5,7}$ | -0.0166   | $F_{5,5,7}$ | -0.0242   | $F_{1,6,7}$ | -0.0143   |
| $F_{2,6,7}$ | -0.0074   | $F_{3,6,7}$ | -0.0012   | $F_{4,6,7}$ | 0.0086    | $F_{5,6,7}$ | 0.0063    |
| $F_{6,6,7}$ | -0.0252   | $F_{1,7,7}$ | -0.0267   | $F_{2,7,7}$ | -0.0059   | $F_{3,7,7}$ | 0.0074    |
| $F_{4,7,7}$ | -0.3933   | $F_{5,7,7}$ | 0.0124    | $F_{6,7,7}$ | 0.0117    | $F_{7,7,7}$ | 0.4571    |
| $F_{1,1,8}$ | 0.0052    | $F_{1,2,8}$ | 0.0004    | $F_{2,2,8}$ | -0.0000   | $F_{1,3,8}$ | -0.0074   |
| $F_{2,3,8}$ | 0.0005    | $F_{3,3,8}$ | -0.0014   | $F_{1,4,8}$ | 0.0063    | $F_{2,4,8}$ | -0.0075   |
| $F_{3,4,8}$ | 0.0054    | $F_{4,4,8}$ | -0.0124   | $F_{1,5,8}$ | -0.0025   | $F_{2,5,8}$ | -0.0024   |
| $F_{3,5,8}$ | -0.0034   | $F_{4,5,8}$ | -0.0183   | $F_{5,5,8}$ | 0.0041    | $F_{1,6,8}$ | 0.0070    |
| $F_{2,6,8}$ | -0.0008   | $F_{3,6,8}$ | 0.0016    | $F_{4,6,8}$ | -0.0044   | $F_{5,6,8}$ | 0.0034    |
| $F_{6,6,8}$ | -0.0069   | $F_{1,7,8}$ | -0.0095   | $F_{2,7,8}$ | 0.0073    | $F_{3,7,8}$ | 0.0021    |
| $F_{4,7,8}$ | 0.0166    | $F_{5,7,8}$ | 0.0183    | $F_{6,7,8}$ | -0.0099   | $F_{7,7,8}$ | 0.0238    |
| $F_{1,8,8}$ | 0.0021    | $F_{2,8,8}$ | 0.0007    | $F_{3,8,8}$ | 0.0010    | $F_{4,8,8}$ | 0.0242    |
| $F_{5,8,8}$ | -0.0041   | $F_{6,8,8}$ | 0.0012    | $F_{7,8,8}$ | -0.0899   | $F_{8,8,8}$ | -0.1407   |
| $F_{1,1,9}$ | -0.0058   | $F_{1,2,9}$ | -0.0082   | $F_{2,2,9}$ | 0.0026    | $F_{1,3,9}$ | -0.0010   |
| $F_{2,3,9}$ | -0.0009   | $F_{3,3,9}$ | -0.0025   | $F_{1,4,9}$ | -0.0060   | $F_{2,4,9}$ | 0.0110    |
| $F_{3,4,9}$ | -0.0013   | $F_{4,4,9}$ | 0.0117    | $F_{1,5,9}$ | 0.0073    | $F_{2,5,9}$ | -0.0038   |
| $F_{3,5,9}$ | 0.0002    | $F_{4,5,9}$ | -0.0099   | $F_{5,5,9}$ | 0.0012    | $F_{1,6,9}$ | -0.0011   |
| $F_{2,6,9}$ | 0.0044    | $F_{3,6,9}$ | 0.0062    | $F_{4,6,9}$ | -0.0251   | $F_{5,6,9}$ | -0.0055   |
| $F_{6,6,9}$ | -0.0062   | $F_{1,7,9}$ | 0.0101    | $F_{2,7,9}$ | -0.0035   | $F_{3,7,9}$ | 0.0014    |
| $F_{4,7,9}$ | 0.0086    | $F_{5,7,9}$ | -0.0044   | $F_{6,7,9}$ | 0.0251    | $F_{7,7,9}$ | 0.0110    |
| $F_{1,8,9}$ | 0.0005    | $F_{2,8,9}$ | 0.0013    | $F_{3,8,9}$ | 0.0011    | $F_{4,8,9}$ | 0.0063    |

Table S18: The CcCR Force Constants for HSSH (cont.)

|                |         |                |         |                |         |                |         |
|----------------|---------|----------------|---------|----------------|---------|----------------|---------|
| $F_{5,8,9}$    | 0.0034  | $F_{6,8,9}$    | 0.0055  | $F_{7,8,9}$    | -0.0728 | $F_{8,8,9}$    | -0.2991 |
| $F_{1,9,9}$    | 0.0036  | $F_{2,9,9}$    | -0.0026 | $F_{3,9,9}$    | -0.0029 | $F_{4,9,9}$    | 0.0252  |
| $F_{5,9,9}$    | 0.0069  | $F_{6,9,9}$    | -0.0062 | $F_{7,9,9}$    | -0.0919 | $F_{8,9,9}$    | -0.3005 |
| $F_{9,9,9}$    | -0.1296 | $F_{1,1,10}$   | 0.0006  | $F_{1,2,10}$   | -0.0010 | $F_{2,2,10}$   | -0.0001 |
| $F_{1,3,10}$   | -0.0017 | $F_{2,3,10}$   | -0.0004 | $F_{3,3,10}$   | -0.0014 | $F_{1,4,10}$   | -0.0006 |
| $F_{2,4,10}$   | 0.0009  | $F_{3,4,10}$   | 0.0021  | $F_{4,4,10}$   | 0.0267  | $F_{1,5,10}$   | 0.0020  |
| $F_{2,5,10}$   | 0.0001  | $F_{3,5,10}$   | -0.0001 | $F_{4,5,10}$   | 0.0095  | $F_{5,5,10}$   | -0.0021 |
| $F_{1,6,10}$   | 0.0017  | $F_{2,6,10}$   | 0.0003  | $F_{3,6,10}$   | 0.0015  | $F_{4,6,10}$   | 0.0101  |
| $F_{5,6,10}$   | 0.0005  | $F_{6,6,10}$   | -0.0036 | $F_{1,7,10}$   | 0.0006  | $F_{2,7,10}$   | 0.0003  |
| $F_{3,7,10}$   | -0.0009 | $F_{4,7,10}$   | -0.0074 | $F_{5,7,10}$   | -0.0063 | $F_{6,7,10}$   | -0.0060 |
| $F_{7,7,10}$   | -0.0372 | $F_{1,8,10}$   | -0.0020 | $F_{2,8,10}$   | -0.0002 | $F_{3,8,10}$   | -0.0002 |
| $F_{4,8,10}$   | -0.0105 | $F_{5,8,10}$   | 0.0025  | $F_{6,8,10}$   | 0.0073  | $F_{7,8,10}$   | -0.0308 |
| $F_{8,8,10}$   | 0.0636  | $F_{1,9,10}$   | 0.0017  | $F_{2,9,10}$   | 0.0007  | $F_{3,9,10}$   | 0.0009  |
| $F_{4,9,10}$   | -0.0143 | $F_{5,9,10}$   | 0.0070  | $F_{6,9,10}$   | 0.0011  | $F_{7,9,10}$   | -0.0297 |
| $F_{8,9,10}$   | 0.0659  | $F_{9,9,10}$   | 0.0631  | $F_{1,10,10}$  | -0.0006 | $F_{2,10,10}$  | -0.0001 |
| $F_{3,10,10}$  | 0.0005  | $F_{4,10,10}$  | -0.0186 | $F_{5,10,10}$  | -0.0052 | $F_{6,10,10}$  | -0.0058 |
| $F_{7,10,10}$  | 0.0440  | $F_{8,10,10}$  | 0.0433  | $F_{9,10,10}$  | 0.0423  | $F_{10,10,10}$ | -0.0248 |
| $F_{1,1,11}$   | 0.0001  | $F_{1,2,11}$   | -0.0002 | $F_{2,2,11}$   | 0.0010  | $F_{1,3,11}$   | -0.0007 |
| $F_{2,3,11}$   | 0.0000  | $F_{3,3,11}$   | -0.0008 | $F_{4,4,11}$   | -0.0003 | $F_{2,4,11}$   | 0.0022  |
| $F_{3,4,11}$   | 0.0029  | $F_{4,4,11}$   | 0.0059  | $F_{1,5,11}$   | 0.0002  | $F_{2,5,11}$   | -0.0018 |
| $F_{3,5,11}$   | -0.0010 | $F_{4,5,11}$   | -0.0073 | $F_{5,5,11}$   | -0.0007 | $F_{1,6,11}$   | 0.0007  |
| $F_{2,6,11}$   | -0.0000 | $F_{3,6,11}$   | 0.0009  | $F_{4,6,11}$   | -0.0035 | $F_{5,6,11}$   | 0.0013  |
| $F_{6,6,11}$   | 0.0026  | $F_{1,7,11}$   | -0.0009 | $F_{2,7,11}$   | -0.0022 | $F_{3,7,11}$   | -0.0028 |
| $F_{4,7,11}$   | -0.0057 | $F_{5,7,11}$   | 0.0075  | $F_{6,7,11}$   | 0.0110  | $F_{7,7,11}$   | -0.0303 |
| $F_{1,8,11}$   | -0.0001 | $F_{2,8,11}$   | 0.0018  | $F_{3,8,11}$   | 0.0018  | $F_{4,8,11}$   | 0.0017  |
| $F_{5,8,11}$   | 0.0024  | $F_{6,8,11}$   | -0.0038 | $F_{7,8,11}$   | 0.0642  | $F_{8,8,11}$   | 0.1442  |
| $F_{1,9,11}$   | 0.0003  | $F_{2,9,11}$   | -0.0000 | $F_{3,9,11}$   | -0.0003 | $F_{4,9,11}$   | -0.0074 |
| $F_{5,9,11}$   | -0.0008 | $F_{6,9,11}$   | -0.0044 | $F_{7,9,11}$   | 0.0807  | $F_{8,9,11}$   | 0.2944  |
| $F_{9,9,11}$   | 0.2962  | $F_{1,10,11}$  | 0.0010  | $F_{2,10,11}$  | 0.0002  | $F_{3,10,11}$  | 0.0006  |
| $F_{4,10,11}$  | 0.0001  | $F_{5,10,11}$  | -0.0004 | $F_{6,10,11}$  | -0.0082 | $F_{7,10,11}$  | 0.0369  |
| $F_{8,10,11}$  | -0.0659 | $F_{9,10,11}$  | -0.0736 | $F_{10,10,11}$ | -0.0380 | $F_{1,11,11}$  | 0.0001  |
| $F_{2,11,11}$  | -0.0010 | $F_{3,11,11}$  | -0.0009 | $F_{4,11,11}$  | 0.0034  | $F_{5,11,11}$  | 0.0000  |
| $F_{6,11,11}$  | 0.0026  | $F_{7,11,11}$  | -0.0696 | $F_{8,11,11}$  | -0.1483 | $F_{9,11,11}$  | -0.2935 |
| $F_{10,11,11}$ | 0.0661  | $F_{11,11,11}$ | 0.1493  | $F_{1,1,12}$   | 0.0005  | $F_{1,2,12}$   | 0.0006  |
| $F_{2,2,12}$   | -0.0009 | $F_{1,3,12}$   | 0.0009  | $F_{2,3,12}$   | -0.0003 | $F_{3,3,12}$   | 0.0008  |
| $F_{1,4,12}$   | -0.0009 | $F_{2,4,12}$   | -0.0028 | $F_{3,4,12}$   | -0.0025 | $F_{4,4,12}$   | 0.0074  |
| $F_{1,5,12}$   | -0.0002 | $F_{2,5,12}$   | 0.0018  | $F_{3,5,12}$   | 0.0013  | $F_{4,5,12}$   | 0.0021  |
| $F_{5,5,12}$   | 0.0010  | $F_{1,6,12}$   | -0.0009 | $F_{2,6,12}$   | 0.0003  | $F_{3,6,12}$   | -0.0008 |
| $F_{4,6,12}$   | -0.0014 | $F_{5,6,12}$   | -0.0011 | $F_{6,6,12}$   | -0.0029 | $F_{1,7,12}$   | 0.0021  |
| $F_{2,7,12}$   | 0.0029  | $F_{3,7,12}$   | 0.0025  | $F_{4,7,12}$   | -0.0086 | $F_{5,7,12}$   | 0.0054  |
| $F_{6,7,12}$   | 0.0013  | $F_{7,7,12}$   | -0.0301 | $F_{1,8,12}$   | -0.0001 | $F_{2,8,12}$   | -0.0010 |
| $F_{3,8,12}$   | -0.0013 | $F_{4,8,12}$   | -0.0073 | $F_{5,8,12}$   | -0.0034 | $F_{6,8,12}$   | -0.0002 |
| $F_{7,8,12}$   | 0.0805  | $F_{8,8,12}$   | 0.2968  | $F_{1,9,12}$   | -0.0015 | $F_{2,9,12}$   | -0.0009 |
| $F_{3,9,12}$   | -0.0008 | $F_{4,9,12}$   | 0.0012  | $F_{5,9,12}$   | -0.0016 | $F_{6,9,12}$   | 0.0062  |
| $F_{7,9,12}$   | 0.0655  | $F_{8,9,12}$   | 0.2939  | $F_{9,9,12}$   | 0.1387  | $F_{1,10,12}$  | -0.0017 |
| $F_{2,10,12}$  | -0.0007 | $F_{3,10,12}$  | -0.0009 | $F_{4,10,12}$  | 0.0021  | $F_{5,10,12}$  | -0.0074 |
| $F_{6,10,12}$  | 0.0010  | $F_{7,10,12}$  | 0.0367  | $F_{8,10,12}$  | -0.0731 | $F_{9,10,12}$  | -0.0651 |
| $F_{10,10,12}$ | -0.0370 | $F_{1,11,12}$  | -0.0004 | $F_{2,11,12}$  | 0.0000  | $F_{3,11,12}$  | 0.0003  |
| $F_{4,11,12}$  | 0.0080  | $F_{5,11,12}$  | 0.0005  | $F_{6,11,12}$  | 0.0009  | $F_{7,11,12}$  | -0.0888 |
| $F_{8,11,12}$  | -0.2924 | $F_{9,11,12}$  | -0.2914 | $F_{10,11,12}$ | 0.0812  | $F_{11,11,12}$ | 0.2918  |
| $F_{1,12,12}$  | 0.0014  | $F_{2,12,12}$  | 0.0008  | $F_{3,12,12}$  | 0.0008  | $F_{4,12,12}$  | 0.0027  |
| $F_{5,12,12}$  | 0.0014  | $F_{6,12,12}$  | -0.0025 | $F_{7,12,12}$  | -0.0692 | $F_{8,12,12}$  | -0.2925 |
| $F_{9,12,12}$  | -0.1441 | $F_{10,12,12}$ | 0.0651  | $F_{11,12,12}$ | 0.2902  | $F_{12,12,12}$ | 0.1459  |
| $F_{1,1,1,1}$  | 0.02    | $F_{1,1,1,2}$  | -0.12   | $F_{1,1,2,2}$  | -0.12   | $F_{1,2,2,2}$  | 0.09    |
| $F_{2,2,2,2}$  | -0.12   | $F_{1,1,1,3}$  | 0.11    | $F_{1,1,2,3}$  | 0.14    | $F_{1,2,2,3}$  | -0.18   |
| $F_{2,2,2,3}$  | -0.38   | $F_{1,1,3,3}$  | -0.12   | $F_{1,2,3,3}$  | 0.18    | $F_{2,2,3,3}$  | 0.62    |
| $F_{1,3,3,3}$  | -0.09   | $F_{2,3,3,3}$  | -0.37   | $F_{3,3,3,3}$  | -0.12   | $F_{1,1,1,4}$  | -0.01   |
| $F_{1,1,2,4}$  | 0.13    | $F_{1,2,2,4}$  | 0.11    | $F_{2,2,2,4}$  | -0.08   | $F_{1,1,3,4}$  | -0.13   |
| $F_{1,2,3,4}$  | -0.14   | $F_{2,2,3,4}$  | 0.18    | $F_{1,3,3,4}$  | 0.12    | $F_{2,3,3,4}$  | -0.18   |
| $F_{3,3,3,4}$  | 0.08    | $F_{1,1,4,4}$  | 0.01    | $F_{1,2,4,4}$  | -0.14   | $F_{2,2,4,4}$  | -0.12   |
| $F_{1,3,4,4}$  | 0.14    | $F_{2,3,4,4}$  | 0.14    | $F_{3,3,4,4}$  | -0.12   | $F_{1,4,4,4}$  | 0.01    |
| $F_{2,4,4,4}$  | 0.16    | $F_{3,4,4,4}$  | -0.16   | $F_{4,4,4,4}$  | 0.81    | $F_{1,1,1,5}$  | 0.11    |
| $F_{1,1,2,5}$  | 0.12    | $F_{1,2,2,5}$  | -0.10   | $F_{2,2,2,5}$  | 0.12    | $F_{1,1,3,5}$  | -0.14   |
| $F_{1,2,3,5}$  | 0.18    | $F_{2,2,3,5}$  | 0.38    | $F_{1,3,3,5}$  | -0.18   | $F_{2,3,3,5}$  | -0.62   |
| $F_{3,3,3,5}$  | 0.37    | $F_{1,1,4,5}$  | -0.12   | $F_{1,2,4,5}$  | -0.11   | $F_{2,2,4,5}$  | 0.08    |
| $F_{1,3,4,5}$  | 0.13    | $F_{2,3,4,5}$  | -0.18   | $F_{3,3,4,5}$  | 0.18    | $F_{1,4,4,5}$  | 0.13    |
| $F_{2,4,4,5}$  | 0.11    | $F_{3,4,4,5}$  | -0.14   | $F_{4,4,4,5}$  | -0.17   | $F_{1,1,5,5}$  | -0.13   |
| $F_{1,2,5,5}$  | 0.10    | $F_{2,2,5,5}$  | -0.12   | $F_{1,3,5,5}$  | -0.18   | $F_{2,3,5,5}$  | -0.38   |
| $F_{3,3,5,5}$  | 0.62    | $F_{1,4,5,5}$  | 0.12    | $F_{2,4,5,5}$  | -0.09   | $F_{3,4,5,5}$  | 0.17    |
| $F_{4,4,5,5}$  | -0.22   | $F_{1,5,5,5}$  | -0.12   | $F_{2,5,5,5}$  | 0.13    | $F_{3,5,5,5}$  | 0.38    |
| $F_{4,5,5,5}$  | 0.10    | $F_{5,5,5,5}$  | -0.14   | $F_{1,1,1,6}$  | -0.11   | $F_{1,1,2,6}$  | -0.14   |
| $F_{1,2,2,6}$  | 0.18    | $F_{2,2,2,6}$  | 0.38    | $F_{1,1,3,6}$  | 0.12    | $F_{1,2,3,6}$  | -0.18   |
| $F_{2,2,3,6}$  | -0.62   | $F_{1,3,3,6}$  | 0.10    | $F_{2,3,3,6}$  | 0.37    | $F_{3,3,3,6}$  | 0.12    |
| $F_{1,1,4,6}$  | 0.12    | $F_{1,2,4,6}$  | 0.13    | $F_{2,2,4,6}$  | -0.18   | $F_{1,3,4,6}$  | -0.12   |

Table S19: The CcCR Force Constants for HSSH (cont.)

|               |       |               |       |               |       |               |       |
|---------------|-------|---------------|-------|---------------|-------|---------------|-------|
| $F_{2,3,4,6}$ | 0.18  | $F_{3,3,4,6}$ | -0.09 | $F_{1,4,4,6}$ | -0.13 | $F_{2,4,4,6}$ | -0.14 |
| $F_{3,4,4,6}$ | 0.12  | $F_{4,4,4,6}$ | 0.18  | $F_{1,1,5,6}$ | 0.14  | $F_{1,2,5,6}$ | -0.18 |
| $F_{2,2,5,6}$ | -0.38 | $F_{1,3,5,6}$ | 0.17  | $F_{2,3,5,6}$ | 0.62  | $F_{3,3,5,6}$ | -0.37 |
| $F_{1,4,5,6}$ | -0.13 | $F_{2,4,5,6}$ | 0.17  | $F_{3,4,5,6}$ | -0.17 | $F_{4,4,5,6}$ | 0.13  |
| $F_{1,5,5,6}$ | 0.18  | $F_{2,5,5,6}$ | 0.37  | $F_{3,5,5,6}$ | -0.63 | $F_{4,5,5,6}$ | -0.17 |
| $F_{5,5,5,6}$ | -0.37 | $F_{1,1,6,6}$ | -0.12 | $F_{1,2,6,6}$ | 0.18  | $F_{2,2,6,6}$ | 0.63  |
| $F_{1,3,6,6}$ | -0.10 | $F_{2,3,6,6}$ | -0.38 | $F_{3,3,6,6}$ | -0.13 | $F_{1,4,6,6}$ | 0.12  |
| $F_{2,4,6,6}$ | -0.18 | $F_{3,4,6,6}$ | 0.10  | $F_{4,4,6,6}$ | -0.23 | $F_{1,5,6,6}$ | -0.17 |
| $F_{2,5,6,6}$ | -0.63 | $F_{3,5,6,6}$ | 0.37  | $F_{4,5,6,6}$ | 0.17  | $F_{5,5,6,6}$ | 0.64  |
| $F_{1,6,6,6}$ | 0.12  | $F_{2,6,6,6}$ | 0.38  | $F_{3,6,6,6}$ | 0.14  | $F_{4,6,6,6}$ | -0.13 |
| $F_{5,6,6,6}$ | -0.37 | $F_{6,6,6,6}$ | -0.14 | $F_{1,1,1,7}$ | -0.02 | $F_{1,1,2,7}$ | -0.01 |
| $F_{1,2,2,7}$ | 0.00  | $F_{2,2,2,7}$ | -0.01 | $F_{1,1,3,7}$ | 0.01  | $F_{1,2,3,7}$ | -0.00 |
| $F_{2,2,3,7}$ | -0.00 | $F_{1,3,3,7}$ | 0.00  | $F_{2,3,3,7}$ | 0.00  | $F_{3,3,3,7}$ | 0.01  |
| $F_{1,1,4,7}$ | 0.00  | $F_{1,2,4,7}$ | 0.01  | $F_{2,2,4,7}$ | 0.01  | $F_{1,3,4,7}$ | -0.01 |
| $F_{2,3,4,7}$ | -0.01 | $F_{3,3,4,7}$ | 0.00  | $F_{1,4,4,7}$ | -0.02 | $F_{2,4,4,7}$ | -0.03 |
| $F_{3,4,4,7}$ | 0.03  | $F_{4,4,4,7}$ | -0.79 | $F_{1,1,5,7}$ | 0.00  | $F_{1,2,5,7}$ | -0.00 |
| $F_{2,2,5,7}$ | 0.02  | $F_{1,3,5,7}$ | 0.01  | $F_{2,3,5,7}$ | -0.00 | $F_{3,3,5,7}$ | 0.00  |
| $F_{1,4,5,7}$ | -0.01 | $F_{2,4,5,7}$ | 0.00  | $F_{3,4,5,7}$ | 0.00  | $F_{4,4,5,7}$ | 0.05  |
| $F_{1,5,5,7}$ | 0.01  | $F_{2,5,5,7}$ | -0.02 | $F_{3,5,5,7}$ | 0.00  | $F_{4,5,5,7}$ | 0.10  |
| $F_{5,5,5,7}$ | 0.01  | $F_{1,1,6,7}$ | -0.01 | $F_{1,2,6,7}$ | 0.01  | $F_{2,2,6,7}$ | 0.00  |
| $F_{1,3,6,7}$ | -0.00 | $F_{2,3,6,7}$ | -0.00 | $F_{3,3,6,7}$ | -0.01 | $F_{1,4,6,7}$ | 0.02  |
| $F_{2,4,6,7}$ | 0.00  | $F_{3,4,6,7}$ | 0.00  | $F_{4,4,6,7}$ | -0.04 | $F_{1,5,6,7}$ | -0.01 |
| $F_{2,5,6,7}$ | 0.00  | $F_{3,5,6,7}$ | -0.00 | $F_{4,5,6,7}$ | 0.00  | $F_{5,5,6,7}$ | -0.01 |
| $F_{1,6,6,7}$ | 0.01  | $F_{2,6,6,7}$ | 0.00  | $F_{3,6,6,7}$ | 0.00  | $F_{4,6,6,7}$ | 0.10  |
| $F_{5,6,6,7}$ | 0.00  | $F_{6,6,6,7}$ | 0.00  | $F_{1,1,7,7}$ | 0.01  | $F_{1,2,7,7}$ | 0.00  |
| $F_{2,2,7,7}$ | -0.00 | $F_{1,3,7,7}$ | -0.00 | $F_{2,3,7,7}$ | 0.01  | $F_{3,3,7,7}$ | -0.01 |
| $F_{1,4,7,7}$ | 0.02  | $F_{2,4,7,7}$ | 0.02  | $F_{3,4,7,7}$ | -0.02 | $F_{4,4,7,7}$ | 0.79  |
| $F_{1,5,7,7}$ | 0.01  | $F_{2,5,7,7}$ | -0.01 | $F_{3,5,7,7}$ | -0.01 | $F_{4,5,7,7}$ | -0.04 |
| $F_{5,5,7,7}$ | -0.10 | $F_{1,6,7,7}$ | -0.01 | $F_{2,6,7,7}$ | -0.01 | $F_{3,6,7,7}$ | 0.00  |
| $F_{4,6,7,7}$ | 0.01  | $F_{5,6,7,7}$ | 0.00  | $F_{6,6,7,7}$ | -0.11 | $F_{1,7,7,7}$ | -0.04 |
| $F_{2,7,7,7}$ | -0.02 | $F_{3,7,7,7}$ | 0.03  | $F_{4,7,7,7}$ | -0.79 | $F_{5,7,7,7}$ | 0.03  |
| $F_{6,7,7,7}$ | -0.01 | $F_{7,7,7,7}$ | 0.81  | $F_{1,1,1,8}$ | 0.01  | $F_{1,1,2,8}$ | -0.00 |
| $F_{1,2,2,8}$ | 0.01  | $F_{2,2,2,8}$ | -0.00 | $F_{1,1,3,8}$ | 0.00  | $F_{1,2,3,8}$ | 0.00  |
| $F_{2,2,3,8}$ | -0.00 | $F_{1,3,3,8}$ | -0.01 | $F_{2,3,3,8}$ | -0.00 | $F_{3,3,3,8}$ | 0.00  |
| $F_{1,1,4,8}$ | -0.01 | $F_{1,2,4,8}$ | -0.00 | $F_{2,2,4,8}$ | -0.00 | $F_{1,3,4,8}$ | 0.00  |
| $F_{2,3,4,8}$ | -0.00 | $F_{3,3,4,8}$ | 0.01  | $F_{1,4,4,8}$ | 0.01  | $F_{2,4,4,8}$ | 0.01  |
| $F_{3,4,4,8}$ | -0.00 | $F_{4,4,4,8}$ | 0.03  | $F_{1,1,5,8}$ | 0.01  | $F_{1,2,5,8}$ | -0.01 |
| $F_{2,2,5,8}$ | 0.01  | $F_{1,3,5,8}$ | -0.00 | $F_{2,3,5,8}$ | 0.00  | $F_{3,3,5,8}$ | -0.00 |
| $F_{1,4,5,8}$ | 0.00  | $F_{2,4,5,8}$ | 0.01  | $F_{3,4,5,8}$ | 0.00  | $F_{4,4,5,8}$ | 0.10  |
| $F_{1,5,5,8}$ | 0.02  | $F_{2,5,5,8}$ | -0.01 | $F_{3,5,5,8}$ | -0.00 | $F_{4,5,5,8}$ | -0.02 |
| $F_{5,5,5,8}$ | 0.01  | $F_{1,1,6,8}$ | -0.00 | $F_{1,2,6,8}$ | -0.00 | $F_{2,2,6,8}$ | -0.00 |
| $F_{1,3,6,8}$ | 0.01  | $F_{2,3,6,8}$ | 0.00  | $F_{3,3,6,8}$ | -0.00 | $F_{1,4,6,8}$ | -0.00 |
| $F_{2,4,6,8}$ | 0.00  | $F_{3,4,6,8}$ | -0.01 | $F_{4,4,6,8}$ | 0.00  | $F_{1,5,6,8}$ | -0.00 |
| $F_{2,5,6,8}$ | 0.00  | $F_{3,5,6,8}$ | 0.00  | $F_{4,5,6,8}$ | -0.00 | $F_{5,5,6,8}$ | 0.00  |
| $F_{1,6,6,8}$ | -0.00 | $F_{2,6,6,8}$ | -0.00 | $F_{3,6,6,8}$ | 0.00  | $F_{4,6,6,8}$ | 0.01  |
| $F_{5,6,6,8}$ | -0.01 | $F_{6,6,6,8}$ | -0.00 | $F_{1,1,7,8}$ | 0.01  | $F_{1,2,7,8}$ | 0.00  |
| $F_{2,2,7,8}$ | -0.00 | $F_{1,3,7,8}$ | -0.01 | $F_{2,3,7,8}$ | 0.00  | $F_{3,3,7,8}$ | -0.00 |
| $F_{1,4,7,8}$ | 0.00  | $F_{2,4,7,8}$ | -0.01 | $F_{3,4,7,8}$ | 0.00  | $F_{4,4,7,8}$ | -0.04 |
| $F_{1,5,7,8}$ | -0.01 | $F_{2,5,7,8}$ | 0.00  | $F_{3,5,7,8}$ | -0.00 | $F_{4,5,7,8}$ | -0.09 |
| $F_{5,5,7,8}$ | 0.01  | $F_{1,6,7,8}$ | 0.00  | $F_{2,6,7,8}$ | -0.00 | $F_{3,6,7,8}$ | 0.00  |
| $F_{4,6,7,8}$ | 0.00  | $F_{5,6,7,8}$ | 0.00  | $F_{6,6,7,8}$ | -0.00 | $F_{1,7,7,8}$ | -0.01 |
| $F_{2,7,7,8}$ | 0.01  | $F_{3,7,7,8}$ | 0.00  | $F_{4,7,7,8}$ | 0.05  | $F_{5,7,7,8}$ | 0.10  |
| $F_{6,7,7,8}$ | -0.01 | $F_{7,7,7,8}$ | -0.17 | $F_{1,1,8,8}$ | -0.01 | $F_{1,2,8,8}$ | 0.00  |
| $F_{2,2,8,8}$ | -0.00 | $F_{1,3,8,8}$ | -0.00 | $F_{2,3,8,8}$ | -0.00 | $F_{3,3,8,8}$ | 0.00  |
| $F_{1,4,8,8}$ | -0.01 | $F_{2,4,8,8}$ | -0.00 | $F_{3,4,8,8}$ | 0.01  | $F_{4,4,8,8}$ | -0.10 |
| $F_{1,5,8,8}$ | -0.01 | $F_{2,5,8,8}$ | 0.01  | $F_{3,5,8,8}$ | 0.00  | $F_{4,5,8,8}$ | 0.01  |
| $F_{5,5,8,8}$ | -0.01 | $F_{1,6,8,8}$ | 0.01  | $F_{2,6,8,8}$ | 0.00  | $F_{3,6,8,8}$ | -0.00 |
| $F_{4,6,8,8}$ | -0.01 | $F_{5,6,8,8}$ | -0.01 | $F_{6,6,8,8}$ | 0.01  | $F_{1,7,8,8}$ | 0.01  |
| $F_{2,7,8,8}$ | 0.00  | $F_{3,7,8,8}$ | -0.00 | $F_{4,7,8,8}$ | 0.10  | $F_{5,7,8,8}$ | -0.02 |
| $F_{6,7,8,8}$ | 0.01  | $F_{7,7,8,8}$ | -0.22 | $F_{1,8,8,8}$ | 0.01  | $F_{2,8,8,8}$ | -0.01 |
| $F_{3,8,8,8}$ | 0.00  | $F_{4,8,8,8}$ | 0.01  | $F_{5,8,8,8}$ | 0.01  | $F_{6,8,8,8}$ | 0.01  |
| $F_{7,8,8,8}$ | 0.10  | $F_{8,8,8,8}$ | -0.14 | $F_{1,1,1,9}$ | -0.00 | $F_{1,1,2,9}$ | 0.01  |
| $F_{1,2,2,9}$ | 0.00  | $F_{2,2,2,9}$ | 0.00  | $F_{1,1,3,9}$ | 0.00  | $F_{1,2,3,9}$ | -0.00 |
| $F_{2,2,3,9}$ | 0.00  | $F_{1,3,3,9}$ | -0.01 | $F_{2,3,3,9}$ | 0.00  | $F_{3,3,3,9}$ | -0.01 |
| $F_{1,1,4,9}$ | 0.01  | $F_{1,2,4,9}$ | 0.00  | $F_{2,2,4,9}$ | -0.01 | $F_{1,3,4,9}$ | -0.00 |
| $F_{2,3,4,9}$ | 0.00  | $F_{3,3,4,9}$ | 0.01  | $F_{1,4,4,9}$ | -0.01 | $F_{2,4,4,9}$ | -0.01 |
| $F_{3,4,4,9}$ | 0.01  | $F_{4,4,4,9}$ | 0.01  | $F_{1,1,5,9}$ | -0.00 | $F_{1,2,5,9}$ | -0.00 |
| $F_{2,2,5,9}$ | -0.00 | $F_{1,3,5,9}$ | 0.00  | $F_{2,3,5,9}$ | -0.00 | $F_{3,3,5,9}$ | -0.01 |
| $F_{1,4,5,9}$ | -0.00 | $F_{2,4,5,9}$ | 0.01  | $F_{3,4,5,9}$ | -0.00 | $F_{4,4,5,9}$ | 0.01  |
| $F_{1,5,5,9}$ | 0.00  | $F_{2,5,5,9}$ | 0.01  | $F_{3,5,5,9}$ | 0.01  | $F_{4,5,5,9}$ | -0.01 |
| $F_{5,5,5,9}$ | -0.01 | $F_{1,1,6,9}$ | 0.01  | $F_{1,2,6,9}$ | 0.00  | $F_{2,2,6,9}$ | -0.01 |
| $F_{1,3,6,9}$ | 0.01  | $F_{2,3,6,9}$ | 0.00  | $F_{3,3,6,9}$ | 0.01  | $F_{1,4,6,9}$ | -0.00 |
| $F_{2,4,6,9}$ | -0.00 | $F_{3,4,6,9}$ | -0.01 | $F_{4,4,6,9}$ | 0.11  | $F_{1,5,6,9}$ | 0.00  |
| $F_{2,5,6,9}$ | 0.01  | $F_{3,5,6,9}$ | 0.00  | $F_{4,5,6,9}$ | 0.00  | $F_{5,5,6,9}$ | -0.01 |

Table S20: The CcCR Force Constants for HSSH (cont.)

|                 |       |                 |       |                 |       |                 |       |
|-----------------|-------|-----------------|-------|-----------------|-------|-----------------|-------|
| $F_{1,6,6,9}$   | -0.02 | $F_{2,6,6,9}$   | -0.00 | $F_{3,6,6,9}$   | -0.01 | $F_{4,6,6,9}$   | 0.02  |
| $F_{5,6,6,9}$   | -0.00 | $F_{6,6,6,9}$   | 0.00  | $F_{1,1,7,9}$   | -0.01 | $F_{1,2,7,9}$   | -0.01 |
| $F_{2,2,7,9}$   | 0.00  | $F_{1,3,7,9}$   | 0.00  | $F_{2,3,7,9}$   | 0.00  | $F_{3,3,7,9}$   | -0.00 |
| $F_{1,4,7,9}$   | -0.01 | $F_{2,4,7,9}$   | 0.01  | $F_{3,4,7,9}$   | -0.00 | $F_{4,4,7,9}$   | -0.01 |
| $F_{1,5,7,9}$   | 0.01  | $F_{2,5,7,9}$   | -0.01 | $F_{3,5,7,9}$   | -0.00 | $F_{4,5,7,9}$   | -0.00 |
| $F_{5,5,7,9}$   | 0.01  | $F_{1,6,7,9}$   | -0.01 | $F_{2,6,7,9}$   | 0.00  | $F_{3,6,7,9}$   | 0.01  |
| $F_{4,6,7,9}$   | -0.10 | $F_{5,6,7,9}$   | -0.00 | $F_{6,6,7,9}$   | 0.00  | $F_{1,7,7,9}$   | 0.01  |
| $F_{2,7,7,9}$   | -0.00 | $F_{3,7,7,9}$   | 0.00  | $F_{4,7,7,9}$   | 0.04  | $F_{5,7,7,9}$   | -0.00 |
| $F_{6,7,7,9}$   | 0.11  | $F_{7,7,7,9}$   | -0.18 | $F_{1,1,8,9}$   | 0.00  | $F_{1,2,8,9}$   | 0.00  |
| $F_{2,2,8,9}$   | 0.00  | $F_{1,3,8,9}$   | -0.00 | $F_{2,3,8,9}$   | 0.00  | $F_{3,3,8,9}$   | 0.00  |
| $F_{1,4,8,9}$   | -0.00 | $F_{2,4,8,9}$   | -0.00 | $F_{3,4,8,9}$   | 0.00  | $F_{4,4,8,9}$   | -0.00 |
| $F_{1,5,8,9}$   | 0.00  | $F_{2,5,8,9}$   | -0.01 | $F_{3,5,8,9}$   | -0.00 | $F_{4,5,8,9}$   | -0.00 |
| $F_{5,5,8,9}$   | 0.01  | $F_{1,6,8,9}$   | -0.00 | $F_{2,6,8,9}$   | -0.00 | $F_{3,6,8,9}$   | -0.00 |
| $F_{4,6,8,9}$   | -0.00 | $F_{5,6,8,9}$   | 0.01  | $F_{6,6,8,9}$   | 0.00  | $F_{1,7,8,9}$   | 0.00  |
| $F_{2,7,8,9}$   | 0.00  | $F_{3,7,8,9}$   | -0.00 | $F_{4,7,8,9}$   | -0.00 | $F_{5,7,8,9}$   | 0.00  |
| $F_{6,7,8,9}$   | 0.00  | $F_{7,7,8,9}$   | -0.13 | $F_{1,8,8,9}$   | 0.00  | $F_{2,8,8,9}$   | 0.00  |
| $F_{3,8,8,9}$   | -0.00 | $F_{4,8,8,9}$   | 0.01  | $F_{5,8,8,9}$   | -0.00 | $F_{6,8,8,9}$   | -0.01 |
| $F_{7,8,8,9}$   | 0.17  | $F_{8,8,8,9}$   | 0.37  | $F_{1,1,9,9}$   | -0.01 | $F_{1,2,9,9}$   | 0.00  |
| $F_{2,2,9,9}$   | 0.00  | $F_{1,3,9,9}$   | 0.00  | $F_{2,3,9,9}$   | -0.00 | $F_{3,3,9,9}$   | -0.00 |
| $F_{1,4,9,9}$   | 0.00  | $F_{2,4,9,9}$   | -0.00 | $F_{3,4,9,9}$   | 0.00  | $F_{4,4,9,9}$   | -0.11 |
| $F_{1,5,9,9}$   | -0.00 | $F_{2,5,9,9}$   | 0.00  | $F_{3,5,9,9}$   | 0.00  | $F_{4,5,9,9}$   | -0.00 |
| $F_{5,5,9,9}$   | 0.01  | $F_{1,6,9,9}$   | 0.01  | $F_{2,6,9,9}$   | -0.00 | $F_{3,6,9,9}$   | 0.00  |
| $F_{4,6,9,9}$   | -0.00 | $F_{5,6,9,9}$   | -0.00 | $F_{6,6,9,9}$   | 0.01  | $F_{1,7,9,9}$   | 0.01  |
| $F_{2,7,9,9}$   | -0.00 | $F_{3,7,9,9}$   | -0.01 | $F_{4,7,9,9}$   | 0.10  | $F_{5,7,9,9}$   | 0.01  |
| $F_{6,7,9,9}$   | -0.02 | $F_{7,7,9,9}$   | -0.23 | $F_{1,8,9,9}$   | 0.00  | $F_{2,8,9,9}$   | -0.00 |
| $F_{3,8,9,9}$   | -0.00 | $F_{4,8,9,9}$   | 0.00  | $F_{5,8,9,9}$   | -0.01 | $F_{6,8,9,9}$   | 0.00  |
| $F_{7,8,9,9}$   | 0.17  | $F_{8,8,9,9}$   | 0.64  | $F_{1,9,9,9}$   | -0.01 | $F_{2,9,9,9}$   | 0.00  |
| $F_{3,9,9,9}$   | -0.00 | $F_{4,9,9,9}$   | 0.00  | $F_{5,9,9,9}$   | 0.00  | $F_{6,9,9,9}$   | 0.00  |
| $F_{7,9,9,9}$   | 0.13  | $F_{8,9,9,9}$   | 0.37  | $F_{9,9,9,9}$   | -0.14 | $F_{1,1,1,10}$  | 0.00  |
| $F_{1,1,2,10}$  | 0.00  | $F_{1,2,2,10}$  | 0.00  | $F_{2,2,2,10}$  | 0.00  | $F_{1,1,3,10}$  | 0.00  |
| $F_{1,2,3,10}$  | -0.00 | $F_{2,2,3,10}$  | 0.00  | $F_{1,3,3,10}$  | -0.00 | $F_{2,3,3,10}$  | -0.00 |
| $F_{3,3,3,10}$  | -0.00 | $F_{1,1,4,10}$  | -0.00 | $F_{1,2,4,10}$  | -0.00 | $F_{2,2,4,10}$  | 0.00  |
| $F_{1,3,4,10}$  | 0.00  | $F_{2,3,4,10}$  | -0.00 | $F_{3,3,4,10}$  | 0.00  | $F_{1,4,4,10}$  | 0.00  |
| $F_{2,4,4,10}$  | 0.00  | $F_{3,4,4,10}$  | -0.00 | $F_{4,4,4,10}$  | -0.04 | $F_{1,1,5,10}$  | 0.00  |
| $F_{1,2,5,10}$  | -0.00 | $F_{2,2,5,10}$  | -0.00 | $F_{1,3,5,10}$  | 0.00  | $F_{2,3,5,10}$  | -0.00 |
| $F_{3,3,5,10}$  | -0.00 | $F_{1,4,5,10}$  | -0.00 | $F_{2,4,5,10}$  | -0.00 | $F_{3,4,5,10}$  | 0.00  |
| $F_{4,4,5,10}$  | -0.01 | $F_{1,5,5,10}$  | 0.00  | $F_{2,5,5,10}$  | 0.00  | $F_{3,5,5,10}$  | 0.00  |
| $F_{4,5,5,10}$  | 0.01  | $F_{5,5,5,10}$  | 0.01  | $F_{1,1,6,10}$  | 0.00  | $F_{1,2,6,10}$  | -0.00 |
| $F_{2,2,6,10}$  | -0.00 | $F_{1,3,6,10}$  | 0.00  | $F_{2,3,6,10}$  | 0.00  | $F_{3,3,6,10}$  | 0.00  |
| $F_{1,4,6,10}$  | -0.00 | $F_{2,4,6,10}$  | 0.00  | $F_{3,4,6,10}$  | -0.00 | $F_{4,4,6,10}$  | -0.01 |
| $F_{1,5,6,10}$  | -0.00 | $F_{2,5,6,10}$  | 0.00  | $F_{3,5,6,10}$  | -0.00 | $F_{4,5,6,10}$  | -0.00 |
| $F_{5,5,6,10}$  | -0.00 | $F_{1,6,6,10}$  | -0.00 | $F_{2,6,6,10}$  | -0.00 | $F_{3,6,6,10}$  | -0.00 |
| $F_{4,6,6,10}$  | 0.01  | $F_{5,6,6,10}$  | 0.00  | $F_{6,6,6,10}$  | 0.01  | $F_{1,1,7,10}$  | 0.00  |
| $F_{1,2,7,10}$  | 0.00  | $F_{2,2,7,10}$  | -0.00 | $F_{1,3,7,10}$  | -0.00 | $F_{2,3,7,10}$  | 0.00  |
| $F_{3,3,7,10}$  | -0.00 | $F_{1,4,7,10}$  | -0.01 | $F_{2,4,7,10}$  | -0.00 | $F_{3,4,7,10}$  | 0.00  |
| $F_{4,4,7,10}$  | 0.02  | $F_{1,5,7,10}$  | 0.00  | $F_{2,5,7,10}$  | 0.01  | $F_{3,5,7,10}$  | -0.00 |
| $F_{4,5,7,10}$  | 0.00  | $F_{5,5,7,10}$  | -0.01 | $F_{1,6,7,10}$  | -0.00 | $F_{2,6,7,10}$  | -0.00 |
| $F_{3,6,7,10}$  | 0.00  | $F_{4,6,7,10}$  | 0.01  | $F_{5,6,7,10}$  | 0.00  | $F_{6,6,7,10}$  | 0.00  |
| $F_{1,7,7,10}$  | 0.00  | $F_{2,7,7,10}$  | 0.00  | $F_{3,7,7,10}$  | -0.00 | $F_{4,7,7,10}$  | -0.02 |
| $F_{5,7,7,10}$  | 0.01  | $F_{6,7,7,10}$  | 0.01  | $F_{7,7,7,10}$  | 0.01  | $F_{1,1,8,10}$  | -0.00 |
| $F_{1,2,8,10}$  | 0.00  | $F_{2,2,8,10}$  | 0.00  | $F_{1,3,8,10}$  | -0.00 | $F_{2,3,8,10}$  | -0.00 |
| $F_{3,3,8,10}$  | 0.00  | $F_{1,4,8,10}$  | 0.00  | $F_{2,4,8,10}$  | 0.00  | $F_{3,4,8,10}$  | 0.00  |
| $F_{4,4,8,10}$  | 0.01  | $F_{1,5,8,10}$  | -0.00 | $F_{2,5,8,10}$  | -0.00 | $F_{3,5,8,10}$  | 0.00  |
| $F_{4,5,8,10}$  | -0.01 | $F_{5,5,8,10}$  | -0.01 | $F_{1,6,8,10}$  | 0.00  | $F_{2,6,8,10}$  | 0.00  |
| $F_{3,6,8,10}$  | 0.00  | $F_{4,6,8,10}$  | -0.01 | $F_{5,6,8,10}$  | -0.00 | $F_{6,6,8,10}$  | -0.00 |
| $F_{1,7,8,10}$  | -0.00 | $F_{2,7,8,10}$  | -0.00 | $F_{3,7,8,10}$  | 0.00  | $F_{4,7,8,10}$  | -0.01 |
| $F_{5,7,8,10}$  | 0.00  | $F_{6,7,8,10}$  | 0.00  | $F_{7,7,8,10}$  | 0.13  | $F_{1,8,8,10}$  | 0.00  |
| $F_{2,8,8,10}$  | 0.00  | $F_{3,8,8,10}$  | 0.00  | $F_{4,8,8,10}$  | 0.01  | $F_{5,8,8,10}$  | 0.02  |
| $F_{6,8,8,10}$  | -0.00 | $F_{7,8,8,10}$  | 0.12  | $F_{8,8,8,10}$  | -0.12 | $F_{1,1,9,10}$  | -0.00 |
| $F_{1,2,9,10}$  | 0.00  | $F_{2,2,9,10}$  | 0.00  | $F_{1,3,9,10}$  | 0.00  | $F_{2,3,9,10}$  | -0.00 |
| $F_{3,3,9,10}$  | 0.00  | $F_{1,4,9,10}$  | 0.00  | $F_{2,4,9,10}$  | -0.00 | $F_{3,4,9,10}$  | -0.00 |
| $F_{4,4,9,10}$  | 0.01  | $F_{1,5,9,10}$  | -0.00 | $F_{2,5,9,10}$  | 0.00  | $F_{3,5,9,10}$  | 0.00  |
| $F_{4,5,9,10}$  | -0.00 | $F_{5,5,9,10}$  | -0.01 | $F_{1,6,9,10}$  | 0.00  | $F_{2,6,9,10}$  | 0.00  |
| $F_{3,6,9,10}$  | -0.00 | $F_{4,6,9,10}$  | -0.01 | $F_{5,6,9,10}$  | -0.00 | $F_{6,6,9,10}$  | -0.01 |
| $F_{1,7,9,10}$  | 0.00  | $F_{2,7,9,10}$  | 0.00  | $F_{3,7,9,10}$  | -0.00 | $F_{4,7,9,10}$  | -0.02 |
| $F_{5,7,9,10}$  | 0.00  | $F_{6,7,9,10}$  | -0.00 | $F_{7,7,9,10}$  | 0.13  | $F_{1,8,9,10}$  | 0.00  |
| $F_{2,8,9,10}$  | 0.00  | $F_{3,8,9,10}$  | -0.00 | $F_{4,8,9,10}$  | 0.01  | $F_{5,8,9,10}$  | 0.00  |
| $F_{6,8,9,10}$  | 0.00  | $F_{7,8,9,10}$  | 0.13  | $F_{8,8,9,10}$  | -0.18 | $F_{1,9,9,10}$  | -0.00 |
| $F_{2,9,9,10}$  | 0.00  | $F_{3,9,9,10}$  | -0.00 | $F_{4,9,9,10}$  | 0.01  | $F_{5,9,9,10}$  | -0.00 |
| $F_{6,9,9,10}$  | 0.02  | $F_{7,9,9,10}$  | 0.12  | $F_{8,9,9,10}$  | -0.17 | $F_{9,9,9,10}$  | -0.12 |
| $F_{1,1,10,10}$ | -0.00 | $F_{1,2,10,10}$ | -0.00 | $F_{2,2,10,10}$ | 0.00  | $F_{1,3,10,10}$ | -0.00 |
| $F_{2,3,10,10}$ | -0.00 | $F_{3,3,10,10}$ | 0.00  | $F_{1,4,10,10}$ | 0.00  | $F_{2,4,10,10}$ | 0.00  |
| $F_{3,4,10,10}$ | -0.00 | $F_{4,4,10,10}$ | 0.01  | $F_{1,5,10,10}$ | -0.00 | $F_{2,5,10,10}$ | -0.00 |
| $F_{3,5,10,10}$ | 0.00  | $F_{4,5,10,10}$ | 0.01  | $F_{5,5,10,10}$ | -0.01 | $F_{1,6,10,10}$ | 0.00  |

Table S21: The CcCR Force Constants for HSSH (cont.)

|                  |       |                  |       |                   |       |                  |       |
|------------------|-------|------------------|-------|-------------------|-------|------------------|-------|
| $F_{2,6,10,10}$  | 0.00  | $F_{3,6,10,10}$  | 0.00  | $F_{4,6,10,10}$   | 0.01  | $F_{5,6,10,10}$  | -0.00 |
| $F_{6,6,10,10}$  | -0.01 | $F_{1,7,10,10}$  | -0.00 | $F_{2,7,10,10}$   | -0.00 | $F_{3,7,10,10}$  | 0.00  |
| $F_{4,7,10,10}$  | 0.00  | $F_{5,7,10,10}$  | -0.01 | $F_{6,7,10,10}$   | -0.01 | $F_{7,7,10,10}$  | 0.01  |
| $F_{1,8,10,10}$  | 0.00  | $F_{2,8,10,10}$  | 0.00  | $F_{3,8,10,10}$   | -0.00 | $F_{4,8,10,10}$  | 0.00  |
| $F_{5,8,10,10}$  | 0.01  | $F_{6,8,10,10}$  | 0.00  | $F_{7,8,10,10}$   | -0.12 | $F_{8,8,10,10}$  | -0.13 |
| $F_{1,9,10,10}$  | -0.00 | $F_{2,9,10,10}$  | 0.00  | $F_{3,9,10,10}$   | 0.00  | $F_{4,9,10,10}$  | 0.01  |
| $F_{5,9,10,10}$  | 0.00  | $F_{6,9,10,10}$  | 0.01  | $F_{7,9,10,10}$   | -0.12 | $F_{8,9,10,10}$  | -0.14 |
| $F_{9,9,10,10}$  | -0.12 | $F_{1,10,10,10}$ | 0.00  | $F_{2,10,10,10}$  | 0.00  | $F_{3,10,10,10}$ | 0.00  |
| $F_{4,10,10,10}$ | -0.02 | $F_{5,10,10,10}$ | 0.01  | $F_{6,10,10,10}$  | 0.00  | $F_{7,10,10,10}$ | -0.01 |
| $F_{8,10,10,10}$ | 0.11  | $F_{9,10,10,10}$ | 0.11  | $F_{10,10,10,10}$ | 0.02  | $F_{1,1,1,11}$   | 0.00  |
| $F_{1,1,2,11}$   | 0.00  | $F_{1,2,2,11}$   | 0.00  | $F_{2,2,2,11}$    | 0.00  | $F_{1,1,3,11}$   | 0.00  |
| $F_{1,2,3,11}$   | -0.00 | $F_{2,2,3,11}$   | 0.00  | $F_{1,3,3,11}$    | 0.00  | $F_{2,3,3,11}$   | 0.00  |
| $F_{3,3,3,11}$   | -0.00 | $F_{1,1,4,11}$   | 0.00  | $F_{1,2,4,11}$    | 0.00  | $F_{2,2,4,11}$   | -0.00 |
| $F_{1,3,4,11}$   | 0.00  | $F_{2,3,4,11}$   | 0.00  | $F_{3,3,4,11}$    | -0.00 | $F_{1,4,4,11}$   | 0.00  |
| $F_{2,4,4,11}$   | -0.00 | $F_{3,4,4,11}$   | -0.00 | $F_{4,4,4,11}$    | -0.02 | $F_{1,1,5,11}$   | 0.00  |
| $F_{1,2,5,11}$   | 0.00  | $F_{2,2,5,11}$   | -0.00 | $F_{1,3,5,11}$    | -0.00 | $F_{2,3,5,11}$   | -0.00 |
| $F_{3,3,5,11}$   | -0.00 | $F_{1,4,5,11}$   | -0.00 | $F_{2,4,5,11}$    | 0.00  | $F_{3,4,5,11}$   | 0.00  |
| $F_{4,4,5,11}$   | 0.01  | $F_{1,5,5,11}$   | 0.00  | $F_{2,5,5,11}$    | 0.00  | $F_{3,5,5,11}$   | 0.00  |
| $F_{4,5,5,11}$   | 0.00  | $F_{5,5,5,11}$   | -0.01 | $F_{1,1,6,11}$    | -0.00 | $F_{1,2,6,11}$   | 0.00  |
| $F_{2,2,6,11}$   | -0.00 | $F_{1,3,6,11}$   | -0.00 | $F_{2,3,6,11}$    | -0.00 | $F_{3,3,6,11}$   | 0.00  |
| $F_{1,4,6,11}$   | -0.00 | $F_{2,4,6,11}$   | -0.00 | $F_{3,4,6,11}$    | 0.00  | $F_{4,4,6,11}$   | 0.00  |
| $F_{1,5,6,11}$   | -0.00 | $F_{2,5,6,11}$   | 0.00  | $F_{3,5,6,11}$    | 0.00  | $F_{4,5,6,11}$   | -0.00 |
| $F_{5,5,6,11}$   | -0.00 | $F_{1,6,6,11}$   | 0.00  | $F_{2,6,6,11}$    | 0.00  | $F_{3,6,6,11}$   | 0.00  |
| $F_{4,6,6,11}$   | -0.00 | $F_{5,6,6,11}$   | -0.00 | $F_{6,6,6,11}$    | -0.00 | $F_{1,1,7,11}$   | 0.00  |
| $F_{1,2,7,11}$   | 0.00  | $F_{2,2,7,11}$   | 0.00  | $F_{1,3,7,11}$    | -0.00 | $F_{2,3,7,11}$   | -0.00 |
| $F_{3,3,7,11}$   | 0.00  | $F_{1,4,7,11}$   | -0.00 | $F_{2,4,7,11}$    | 0.00  | $F_{3,4,7,11}$   | 0.00  |
| $F_{4,4,7,11}$   | 0.02  | $F_{1,5,7,11}$   | 0.00  | $F_{2,5,7,11}$    | -0.00 | $F_{3,5,7,11}$   | -0.00 |
| $F_{4,5,7,11}$   | -0.01 | $F_{5,5,7,11}$   | -0.00 | $F_{1,6,7,11}$    | 0.00  | $F_{2,6,7,11}$   | 0.00  |
| $F_{3,6,7,11}$   | 0.00  | $F_{4,6,7,11}$   | -0.01 | $F_{5,6,7,11}$    | 0.00  | $F_{6,6,7,11}$   | -0.00 |
| $F_{1,7,7,11}$   | 0.00  | $F_{2,7,7,11}$   | -0.00 | $F_{3,7,7,11}$    | -0.00 | $F_{4,7,7,11}$   | -0.03 |
| $F_{5,7,7,11}$   | 0.01  | $F_{6,7,7,11}$   | 0.01  | $F_{7,7,7,11}$    | 0.16  | $F_{1,1,8,11}$   | -0.00 |
| $F_{1,2,8,11}$   | -0.00 | $F_{2,2,8,11}$   | 0.00  | $F_{1,3,8,11}$    | 0.00  | $F_{2,3,8,11}$   | 0.00  |
| $F_{3,3,8,11}$   | 0.00  | $F_{1,4,8,11}$   | 0.01  | $F_{2,4,8,11}$    | -0.00 | $F_{3,4,8,11}$   | -0.01 |
| $F_{4,4,8,11}$   | -0.01 | $F_{1,5,8,11}$   | -0.00 | $F_{2,5,8,11}$    | -0.00 | $F_{3,5,8,11}$   | -0.00 |
| $F_{4,5,8,11}$   | 0.00  | $F_{5,5,8,11}$   | 0.01  | $F_{1,6,8,11}$    | -0.00 | $F_{2,6,8,11}$   | -0.00 |
| $F_{3,6,8,11}$   | -0.00 | $F_{4,6,8,11}$   | 0.01  | $F_{5,6,8,11}$    | 0.01  | $F_{6,6,8,11}$   | 0.00  |
| $F_{1,7,8,11}$   | -0.00 | $F_{2,7,8,11}$   | 0.00  | $F_{3,7,8,11}$    | 0.00  | $F_{4,7,8,11}$   | 0.00  |
| $F_{5,7,8,11}$   | 0.01  | $F_{6,7,8,11}$   | -0.01 | $F_{7,7,8,11}$    | 0.11  | $F_{1,8,8,11}$   | 0.00  |
| $F_{2,8,8,11}$   | 0.00  | $F_{3,8,8,11}$   | -0.08 | $F_{4,8,8,11}$    | -0.02 | $F_{5,8,8,11}$   | -0.01 |
| $F_{6,8,8,11}$   | -0.01 | $F_{7,8,8,11}$   | -0.09 | $F_{8,8,8,11}$    | 0.13  | $F_{1,1,9,11}$   | -0.00 |
| $F_{1,2,9,11}$   | 0.00  | $F_{2,2,9,11}$   | -0.00 | $F_{1,3,9,11}$    | -0.00 | $F_{2,3,9,11}$   | -0.00 |
| $F_{3,3,9,11}$   | 0.00  | $F_{1,4,9,11}$   | 0.00  | $F_{2,4,9,11}$    | -0.00 | $F_{3,4,9,11}$   | 0.00  |
| $F_{4,4,9,11}$   | 0.01  | $F_{1,5,9,11}$   | -0.00 | $F_{2,5,9,11}$    | 0.00  | $F_{3,5,9,11}$   | 0.00  |
| $F_{4,5,9,11}$   | 0.00  | $F_{5,5,9,11}$   | -0.00 | $F_{1,6,9,11}$    | 0.00  | $F_{2,6,9,11}$   | 0.00  |
| $F_{3,6,9,11}$   | -0.00 | $F_{4,6,9,11}$   | 0.00  | $F_{5,6,9,11}$    | -0.00 | $F_{6,6,9,11}$   | 0.00  |
| $F_{1,7,9,11}$   | -0.00 | $F_{2,7,9,11}$   | 0.00  | $F_{3,7,9,11}$    | -0.00 | $F_{4,7,9,11}$   | -0.00 |
| $F_{5,7,9,11}$   | -0.00 | $F_{6,7,9,11}$   | -0.00 | $F_{7,7,9,11}$    | 0.14  | $F_{1,8,9,11}$   | -0.00 |
| $F_{2,8,9,11}$   | -0.00 | $F_{3,8,9,11}$   | -0.00 | $F_{4,8,9,11}$    | -0.00 | $F_{5,8,9,11}$   | -0.00 |
| $F_{6,8,9,11}$   | 0.01  | $F_{7,8,9,11}$   | -0.17 | $F_{8,8,9,11}$    | -0.37 | $F_{1,9,9,11}$   | -0.00 |
| $F_{2,9,9,11}$   | 0.00  | $F_{3,9,9,11}$   | 0.00  | $F_{4,9,9,11}$    | 0.00  | $F_{5,9,9,11}$   | -0.00 |
| $F_{6,9,9,11}$   | 0.00  | $F_{7,9,9,11}$   | -0.18 | $F_{8,9,9,11}$    | -0.63 | $F_{9,9,9,11}$   | -0.38 |
| $F_{1,1,10,11}$  | -0.00 | $F_{1,2,10,11}$  | -0.00 | $F_{2,2,10,11}$   | -0.00 | $F_{1,3,10,11}$  | 0.00  |
| $F_{2,3,10,11}$  | 0.00  | $F_{3,3,10,11}$  | 0.00  | $F_{1,4,10,11}$   | 0.00  | $F_{2,4,10,11}$  | 0.00  |
| $F_{3,4,10,11}$  | -0.00 | $F_{4,4,10,11}$  | 0.00  | $F_{1,5,10,11}$   | 0.00  | $F_{2,5,10,11}$  | -0.00 |
| $F_{3,5,10,11}$  | -0.00 | $F_{4,5,10,11}$  | 0.00  | $F_{5,5,10,11}$   | 0.00  | $F_{1,6,10,11}$  | -0.00 |
| $F_{2,6,10,11}$  | -0.00 | $F_{3,6,10,11}$  | -0.00 | $F_{4,6,10,11}$   | 0.01  | $F_{5,6,10,11}$  | -0.00 |
| $F_{6,6,10,11}$  | 0.00  | $F_{1,7,10,11}$  | -0.00 | $F_{2,7,10,11}$   | 0.00  | $F_{3,7,10,11}$  | -0.00 |
| $F_{4,7,10,11}$  | 0.01  | $F_{5,7,10,11}$  | -0.00 | $F_{6,7,10,11}$   | -0.00 | $F_{7,7,10,11}$  | -0.14 |
| $F_{1,8,10,11}$  | -0.00 | $F_{2,8,10,11}$  | 0.00  | $F_{3,8,10,11}$   | -0.00 | $F_{4,8,10,11}$  | -0.00 |
| $F_{5,8,10,11}$  | -0.01 | $F_{6,8,10,11}$  | 0.00  | $F_{7,8,10,11}$   | -0.11 | $F_{8,8,10,11}$  | 0.10  |
| $F_{1,9,10,11}$  | 0.00  | $F_{2,9,10,11}$  | -0.00 | $F_{3,9,10,11}$   | 0.00  | $F_{4,9,10,11}$  | -0.01 |
| $F_{5,9,10,11}$  | 0.00  | $F_{6,9,10,11}$  | 0.00  | $F_{7,9,10,11}$   | -0.13 | $F_{8,9,10,11}$  | 0.18  |
| $F_{9,9,10,11}$  | 0.18  | $F_{1,10,10,11}$ | 0.00  | $F_{2,10,10,11}$  | 0.00  | $F_{3,10,10,11}$ | 0.00  |
| $F_{4,10,10,11}$ | -0.01 | $F_{5,10,10,11}$ | -0.00 | $F_{6,10,10,11}$  | -0.01 | $F_{7,10,10,11}$ | 0.13  |
| $F_{8,10,10,11}$ | 0.12  | $F_{9,10,10,11}$ | 0.14  | $F_{10,10,10,11}$ | -0.12 | $F_{1,1,11,11}$  | 0.00  |
| $F_{1,2,11,11}$  | -0.00 | $F_{2,2,11,11}$  | -0.00 | $F_{1,3,11,11}$   | -0.00 | $F_{2,3,11,11}$  | -0.00 |
| $F_{3,3,11,11}$  | -0.00 | $F_{1,4,11,11}$  | -0.00 | $F_{2,4,11,11}$   | 0.00  | $F_{3,4,11,11}$  | 0.00  |
| $F_{4,4,11,11}$  | -0.00 | $F_{1,5,11,11}$  | 0.00  | $F_{2,5,11,11}$   | 0.00  | $F_{3,5,11,11}$  | 0.00  |
| $F_{4,5,11,11}$  | -0.00 | $F_{5,5,11,11}$  | -0.00 | $F_{1,6,11,11}$   | -0.00 | $F_{2,6,11,11}$  | 0.00  |
| $F_{3,6,11,11}$  | 0.00  | $F_{4,6,11,11}$  | -0.00 | $F_{5,6,11,11}$   | -0.00 | $F_{6,6,11,11}$  | 0.00  |
| $F_{1,7,11,11}$  | 0.00  | $F_{2,7,11,11}$  | -0.00 | $F_{3,7,11,11}$   | -0.00 | $F_{4,7,11,11}$  | 0.01  |
| $F_{5,7,11,11}$  | -0.00 | $F_{6,7,11,11}$  | 0.01  | $F_{7,7,11,11}$   | -0.12 | $F_{1,8,11,11}$  | -0.00 |
| $F_{2,8,11,11}$  | -0.00 | $F_{3,8,11,11}$  | 0.00  | $F_{4,8,11,11}$   | 0.02  | $F_{5,8,11,11}$  | 0.01  |
| $F_{6,8,11,11}$  | 0.00  | $F_{7,8,11,11}$  | 0.08  | $F_{8,8,11,11}$   | -0.12 | $F_{1,9,11,11}$  | 0.00  |

Table S22: The CcCR Force Constants for HSSH (cont.)

|                   |       |                   |       |                  |       |                   |       |
|-------------------|-------|-------------------|-------|------------------|-------|-------------------|-------|
| $F_{2,9,11,11}$   | 0.00  | $F_{3,9,11,11}$   | 0.00  | $F_{4,9,11,11}$  | -0.00 | $F_{5,9,11,11}$   | 0.00  |
| $F_{6,9,11,11}$   | -0.01 | $F_{7,9,11,11}$   | 0.18  | $F_{8,9,11,11}$  | 0.38  | $F_{9,9,11,11}$   | 0.63  |
| $F_{1,10,11,11}$  | 0.00  | $F_{2,10,11,11}$  | 0.00  | $F_{3,10,11,11}$ | 0.00  | $F_{4,10,11,11}$  | 0.00  |
| $F_{5,10,11,11}$  | 0.01  | $F_{6,10,11,11}$  | -0.00 | $F_{7,10,11,11}$ | 0.11  | $F_{8,10,11,11}$  | -0.10 |
| $F_{9,10,11,11}$  | -0.18 | $F_{10,10,11,11}$ | -0.12 | $F_{1,11,11,11}$ | 0.00  | $F_{2,11,11,11}$  | 0.00  |
| $F_{3,11,11,11}$  | 0.00  | $F_{4,11,11,11}$  | -0.01 | $F_{5,11,11,11}$ | -0.00 | $F_{6,11,11,11}$  | -0.00 |
| $F_{7,11,11,11}$  | -0.08 | $F_{8,11,11,11}$  | 0.12  | $F_{9,11,11,11}$ | -0.38 | $F_{10,11,11,11}$ | 0.09  |
| $F_{11,11,11,11}$ | -0.12 | $F_{1,1,1,12}$    | -0.00 | $F_{1,1,2,12}$   | -0.00 | $F_{1,2,2,12}$    | -0.00 |
| $F_{2,2,2,12}$    | -0.00 | $F_{1,1,3,12}$    | -0.00 | $F_{1,2,3,12}$   | 0.00  | $F_{2,2,3,12}$    | -0.00 |
| $F_{1,3,3,12}$    | 0.00  | $F_{2,3,3,12}$    | -0.00 | $F_{3,3,3,12}$   | 0.00  | $F_{1,1,4,12}$    | -0.00 |
| $F_{1,2,4,12}$    | 0.00  | $F_{2,2,4,12}$    | 0.00  | $F_{1,3,4,12}$   | 0.00  | $F_{2,3,4,12}$    | -0.00 |
| $F_{3,3,4,12}$    | -0.00 | $F_{1,4,4,12}$    | 0.00  | $F_{2,4,4,12}$   | 0.00  | $F_{3,4,4,12}$    | -0.00 |
| $F_{4,4,4,12}$    | -0.03 | $F_{1,1,5,12}$    | 0.00  | $F_{1,2,5,12}$   | 0.00  | $F_{2,2,5,12}$    | -0.00 |
| $F_{1,3,5,12}$    | 0.00  | $F_{2,3,5,12}$    | 0.00  | $F_{3,3,5,12}$   | 0.00  | $F_{1,4,5,12}$    | -0.00 |
| $F_{2,4,5,12}$    | -0.00 | $F_{3,4,5,12}$    | 0.00  | $F_{4,4,5,12}$   | -0.00 | $F_{1,5,5,12}$    | -0.00 |
| $F_{2,5,5,12}$    | 0.00  | $F_{3,5,5,12}$    | -0.00 | $F_{4,5,5,12}$   | 0.00  | $F_{5,5,5,12}$    | -0.00 |
| $F_{1,1,6,12}$    | 0.00  | $F_{1,2,6,12}$    | 0.00  | $F_{2,2,6,12}$   | 0.00  | $F_{1,3,6,12}$    | -0.00 |
| $F_{2,3,6,12}$    | 0.00  | $F_{3,3,6,12}$    | -0.00 | $F_{1,4,6,12}$   | -0.00 | $F_{2,4,6,12}$    | -0.00 |
| $F_{3,4,6,12}$    | 0.00  | $F_{4,4,6,12}$    | 0.00  | $F_{1,5,6,12}$   | -0.00 | $F_{2,5,6,12}$    | -0.00 |
| $F_{3,5,6,12}$    | -0.00 | $F_{4,5,6,12}$    | -0.00 | $F_{5,5,6,12}$   | -0.00 | $F_{1,6,6,12}$    | 0.00  |
| $F_{2,6,6,12}$    | -0.00 | $F_{3,6,6,12}$    | -0.00 | $F_{4,6,6,12}$   | 0.01  | $F_{5,6,6,12}$    | 0.00  |
| $F_{6,6,6,12}$    | -0.00 | $F_{1,1,7,12}$    | 0.00  | $F_{1,2,7,12}$   | 0.00  | $F_{2,2,7,12}$    | -0.00 |
| $F_{1,3,7,12}$    | 0.00  | $F_{2,3,7,12}$    | -0.00 | $F_{3,3,7,12}$   | 0.00  | $F_{1,4,7,12}$    | -0.00 |
| $F_{2,4,7,12}$    | -0.00 | $F_{3,4,7,12}$    | -0.00 | $F_{4,4,7,12}$   | 0.02  | $F_{1,5,7,12}$    | -0.00 |
| $F_{2,5,7,12}$    | 0.01  | $F_{3,5,7,12}$    | 0.00  | $F_{4,5,7,12}$   | -0.00 | $F_{5,5,7,12}$    | -0.01 |
| $F_{1,6,7,12}$    | -0.00 | $F_{2,6,7,12}$    | 0.00  | $F_{3,6,7,12}$   | -0.00 | $F_{4,6,7,12}$    | -0.00 |
| $F_{5,6,7,12}$    | 0.00  | $F_{6,6,7,12}$    | -0.00 | $F_{1,7,7,12}$   | 0.00  | $F_{2,7,7,12}$    | 0.00  |
| $F_{3,7,7,12}$    | -0.00 | $F_{4,7,7,12}$    | -0.03 | $F_{5,7,7,12}$   | 0.00  | $F_{6,7,7,12}$    | 0.01  |
| $F_{7,7,7,12}$    | 0.16  | $F_{1,1,8,12}$    | -0.00 | $F_{1,2,8,12}$   | 0.00  | $F_{2,2,8,12}$    | -0.00 |
| $F_{1,3,8,12}$    | -0.00 | $F_{2,3,8,12}$    | -0.00 | $F_{3,3,8,12}$   | -0.00 | $F_{1,4,8,12}$    | 0.00  |
| $F_{2,4,8,12}$    | 0.00  | $F_{3,4,8,12}$    | 0.00  | $F_{4,4,8,12}$   | 0.01  | $F_{1,5,8,12}$    | -0.00 |
| $F_{2,5,8,12}$    | 0.00  | $F_{3,5,8,12}$    | 0.00  | $F_{4,5,8,12}$   | 0.00  | $F_{5,5,8,12}$    | -0.00 |
| $F_{1,6,8,12}$    | 0.00  | $F_{2,6,8,12}$    | 0.00  | $F_{3,6,8,12}$   | 0.00  | $F_{4,6,8,12}$    | -0.00 |
| $F_{5,6,8,12}$    | -0.00 | $F_{6,6,8,12}$    | -0.00 | $F_{1,7,8,12}$   | -0.00 | $F_{2,7,8,12}$    | -0.00 |
| $F_{3,7,8,12}$    | 0.00  | $F_{4,7,8,12}$    | -0.00 | $F_{5,7,8,12}$   | -0.00 | $F_{6,7,8,12}$    | -0.00 |
| $F_{7,7,8,12}$    | 0.14  | $F_{1,8,8,12}$    | -0.00 | $F_{2,8,8,12}$   | -0.00 | $F_{3,8,8,12}$    | -0.00 |
| $F_{4,8,8,12}$    | -0.00 | $F_{5,8,8,12}$    | 0.00  | $F_{6,8,8,12}$   | 0.01  | $F_{7,8,8,12}$    | -0.17 |
| $F_{8,8,8,12}$    | -0.38 | $F_{1,1,9,12}$    | 0.00  | $F_{1,2,9,12}$   | -0.00 | $F_{2,2,9,12}$    | 0.00  |
| $F_{1,3,9,12}$    | -0.00 | $F_{2,3,9,12}$    | 0.00  | $F_{3,3,9,12}$   | -0.00 | $F_{1,4,9,12}$    | 0.00  |
| $F_{2,4,9,12}$    | 0.00  | $F_{3,4,9,12}$    | 0.00  | $F_{4,4,9,12}$   | 0.00  | $F_{1,5,9,12}$    | 0.00  |
| $F_{2,5,9,12}$    | -0.00 | $F_{3,5,9,12}$    | -0.00 | $F_{4,5,9,12}$   | 0.00  | $F_{5,5,9,12}$    | -0.00 |
| $F_{1,6,9,12}$    | 0.00  | $F_{2,6,9,12}$    | 0.00  | $F_{3,6,9,12}$   | 0.00  | $F_{4,6,9,12}$    | -0.01 |
| $F_{5,6,9,12}$    | 0.00  | $F_{6,6,9,12}$    | 0.00  | $F_{1,7,9,12}$   | -0.00 | $F_{2,7,9,12}$    | 0.00  |
| $F_{3,7,9,12}$    | -0.00 | $F_{4,7,9,12}$    | 0.00  | $F_{5,7,9,12}$   | -0.01 | $F_{6,7,9,12}$    | 0.01  |
| $F_{7,7,9,12}$    | 0.12  | $F_{1,8,9,12}$    | -0.00 | $F_{2,8,9,12}$   | 0.00  | $F_{3,8,9,12}$    | 0.00  |
| $F_{4,8,9,12}$    | -0.00 | $F_{5,8,9,12}$    | 0.00  | $F_{6,8,9,12}$   | -0.00 | $F_{7,8,9,12}$    | -0.17 |
| $F_{8,8,9,12}$    | -0.63 | $F_{1,9,9,12}$    | 0.00  | $F_{2,9,9,12}$   | -0.00 | $F_{3,9,9,12}$    | -0.00 |
| $F_{4,9,9,12}$    | -0.00 | $F_{5,9,9,12}$    | -0.00 | $F_{6,9,9,12}$   | -0.01 | $F_{7,9,9,12}$    | -0.10 |
| $F_{8,9,9,12}$    | -0.37 | $F_{9,9,9,12}$    | 0.14  | $F_{1,1,10,12}$  | 0.00  | $F_{1,2,10,12}$   | -0.00 |
| $F_{2,2,10,12}$   | 0.00  | $F_{1,3,10,12}$   | -0.00 | $F_{2,3,10,12}$  | 0.00  | $F_{3,3,10,12}$   | -0.00 |
| $F_{1,4,10,12}$   | 0.00  | $F_{2,4,10,12}$   | 0.00  | $F_{3,4,10,12}$  | 0.00  | $F_{4,4,10,12}$   | 0.00  |
| $F_{1,5,10,12}$   | 0.00  | $F_{2,5,10,12}$   | -0.00 | $F_{3,5,10,12}$  | -0.00 | $F_{4,5,10,12}$   | 0.01  |
| $F_{5,5,10,12}$   | 0.00  | $F_{1,6,10,12}$   | 0.00  | $F_{2,6,10,12}$  | -0.00 | $F_{3,6,10,12}$   | 0.00  |
| $F_{4,6,10,12}$   | 0.00  | $F_{5,6,10,12}$   | -0.00 | $F_{6,6,10,12}$  | -0.00 | $F_{1,7,10,12}$   | -0.00 |
| $F_{2,7,10,12}$   | -0.00 | $F_{3,7,10,12}$   | 0.00  | $F_{4,7,10,12}$  | 0.01  | $F_{5,7,10,12}$   | -0.00 |
| $F_{6,7,10,12}$   | -0.00 | $F_{7,7,10,12}$   | -0.14 | $F_{1,8,10,12}$  | -0.00 | $F_{2,8,10,12}$   | 0.00  |
| $F_{3,8,10,12}$   | 0.00  | $F_{4,8,10,12}$   | -0.01 | $F_{5,8,10,12}$  | 0.00  | $F_{6,8,10,12}$   | 0.00  |
| $F_{7,8,10,12}$   | -0.13 | $F_{8,8,10,12}$   | 0.18  | $F_{1,9,10,12}$  | 0.00  | $F_{2,9,10,12}$   | -0.00 |
| $F_{3,9,10,12}$   | 0.00  | $F_{4,9,10,12}$   | -0.00 | $F_{5,9,10,12}$  | 0.01  | $F_{6,9,10,12}$   | -0.01 |
| $F_{7,9,10,12}$   | -0.12 | $F_{8,9,10,12}$   | 0.17  | $F_{9,9,10,12}$  | 0.10  | $F_{1,10,10,12}$  | -0.00 |
| $F_{2,10,10,12}$  | -0.00 | $F_{3,10,10,12}$  | -0.00 | $F_{4,10,10,12}$ | -0.01 | $F_{5,10,10,12}$  | -0.00 |
| $F_{6,10,10,12}$  | 0.00  | $F_{7,10,10,12}$  | 0.13  | $F_{8,10,10,12}$ | 0.14  | $F_{9,10,10,12}$  | 0.12  |
| $F_{10,10,10,12}$ | -0.11 | $F_{1,1,11,12}$   | 0.00  | $F_{1,2,11,12}$  | -0.00 | $F_{2,2,11,12}$   | 0.00  |
| $F_{1,3,11,12}$   | 0.00  | $F_{2,3,11,12}$   | 0.00  | $F_{3,3,11,12}$  | 0.00  | $F_{1,4,11,12}$   | -0.00 |
| $F_{2,4,11,12}$   | 0.00  | $F_{3,4,11,12}$   | -0.00 | $F_{4,4,11,12}$  | -0.01 | $F_{1,5,11,12}$   | 0.00  |
| $F_{2,5,11,12}$   | -0.00 | $F_{3,5,11,12}$   | -0.00 | $F_{4,5,11,12}$  | -0.00 | $F_{5,5,11,12}$   | 0.00  |
| $F_{1,6,11,12}$   | -0.00 | $F_{2,6,11,12}$   | -0.00 | $F_{3,6,11,12}$  | -0.00 | $F_{4,6,11,12}$   | 0.00  |
| $F_{5,6,11,12}$   | 0.00  | $F_{6,6,11,12}$   | 0.00  | $F_{1,7,11,12}$  | 0.00  | $F_{2,7,11,12}$   | -0.00 |
| $F_{3,7,11,12}$   | -0.00 | $F_{4,7,11,12}$   | 0.01  | $F_{5,7,11,12}$  | 0.00  | $F_{6,7,11,12}$   | 0.00  |
| $F_{7,7,11,12}$   | -0.14 | $F_{1,8,11,12}$   | 0.00  | $F_{2,8,11,12}$  | 0.00  | $F_{3,8,11,12}$   | 0.00  |
| $F_{4,8,11,12}$   | 0.00  | $F_{5,8,11,12}$   | -0.00 | $F_{6,8,11,12}$  | -0.00 | $F_{7,8,11,12}$   | 0.18  |
| $F_{8,8,11,12}$   | 0.38  | $F_{1,9,11,12}$   | 0.00  | $F_{2,9,11,12}$  | -0.00 | $F_{3,9,11,12}$   | -0.00 |
| $F_{4,9,11,12}$   | -0.00 | $F_{5,9,11,12}$   | 0.00  | $F_{6,9,11,12}$  | -0.00 | $F_{7,9,11,12}$   | 0.18  |
| $F_{8,9,11,12}$   | 0.62  | $F_{9,9,11,12}$   | 0.38  | $F_{1,10,11,12}$ | 0.00  | $F_{2,10,11,12}$  | 0.00  |

Table S23: The CcCR Force Constants for HSSH (cont.)

|                   |       |                   |       |                   |       |                   |       |
|-------------------|-------|-------------------|-------|-------------------|-------|-------------------|-------|
| $F_{3,10,11,12}$  | 0.00  | $F_{4,10,11,12}$  | 0.00  | $F_{5,10,11,12}$  | -0.00 | $F_{6,10,11,12}$  | -0.00 |
| $F_{7,10,11,12}$  | 0.14  | $F_{8,10,11,12}$  | -0.18 | $F_{9,10,11,12}$  | -0.18 | $F_{10,10,11,12}$ | -0.14 |
| $F_{1,11,11,12}$  | -0.00 | $F_{2,11,11,12}$  | -0.00 | $F_{3,11,11,12}$  | -0.00 | $F_{4,11,11,12}$  | 0.00  |
| $F_{5,11,11,12}$  | 0.00  | $F_{6,11,11,12}$  | 0.00  | $F_{7,11,11,12}$  | -0.18 | $F_{8,11,11,12}$  | -0.38 |
| $F_{9,11,11,12}$  | -0.62 | $F_{10,11,11,12}$ | 0.18  | $F_{11,11,11,12}$ | 0.38  | $F_{1,1,12,12}$   | 0.00  |
| $F_{1,2,12,12}$   | 0.00  | $F_{2,2,12,12}$   | -0.00 | $F_{1,3,12,12}$   | 0.00  | $F_{2,3,12,12}$   | -0.00 |
| $F_{3,3,12,12}$   | 0.00  | $F_{1,4,12,12}$   | -0.00 | $F_{2,4,12,12}$   | 0.00  | $F_{3,4,12,12}$   | -0.00 |
| $F_{4,4,12,12}$   | -0.01 | $F_{1,5,12,12}$   | 0.00  | $F_{2,5,12,12}$   | 0.00  | $F_{3,5,12,12}$   | 0.00  |
| $F_{4,5,12,12}$   | -0.00 | $F_{5,5,12,12}$   | 0.00  | $F_{1,6,12,12}$   | -0.00 | $F_{2,6,12,12}$   | -0.00 |
| $F_{3,6,12,12}$   | -0.00 | $F_{4,6,12,12}$   | 0.00  | $F_{5,6,12,12}$   | -0.00 | $F_{6,6,12,12}$   | -0.00 |
| $F_{1,7,12,12}$   | 0.00  | $F_{2,7,12,12}$   | -0.00 | $F_{3,7,12,12}$   | 0.00  | $F_{4,7,12,12}$   | 0.00  |
| $F_{5,7,12,12}$   | 0.01  | $F_{6,7,12,12}$   | -0.01 | $F_{7,7,12,12}$   | -0.12 | $F_{1,8,12,12}$   | -0.00 |
| $F_{2,8,12,12}$   | -0.00 | $F_{3,8,12,12}$   | -0.00 | $F_{4,8,12,12}$   | 0.00  | $F_{5,8,12,12}$   | -0.00 |
| $F_{6,8,12,12}$   | 0.01  | $F_{7,8,12,12}$   | 0.18  | $F_{8,8,12,12}$   | 0.62  | $F_{1,9,12,12}$   | -0.00 |
| $F_{2,9,12,12}$   | -0.00 | $F_{3,9,12,12}$   | -0.00 | $F_{4,9,12,12}$   | 0.01  | $F_{5,9,12,12}$   | 0.00  |
| $F_{6,9,12,12}$   | 0.01  | $F_{7,9,12,12}$   | 0.09  | $F_{8,9,12,12}$   | 0.37  | $F_{9,9,12,12}$   | -0.13 |
| $F_{1,10,12,12}$  | -0.00 | $F_{2,10,12,12}$  | 0.00  | $F_{3,10,12,12}$  | -0.00 | $F_{4,10,12,12}$  | 0.00  |
| $F_{5,10,12,12}$  | -0.01 | $F_{6,10,12,12}$  | 0.01  | $F_{7,10,12,12}$  | 0.12  | $F_{8,10,12,12}$  | -0.18 |
| $F_{9,10,12,12}$  | -0.10 | $F_{10,10,12,12}$ | -0.12 | $F_{1,11,12,12}$  | -0.00 | $F_{2,11,12,12}$  | 0.00  |
| $F_{3,11,12,12}$  | 0.00  | $F_{4,11,12,12}$  | 0.00  | $F_{5,11,12,12}$  | -0.00 | $F_{6,11,12,12}$  | -0.00 |
| $F_{7,11,12,12}$  | -0.18 | $F_{8,11,12,12}$  | -0.62 | $F_{9,11,12,12}$  | -0.37 | $F_{10,11,12,12}$ | 0.18  |
| $F_{11,11,12,12}$ | 0.62  | $F_{1,12,12,12}$  | 0.00  | $F_{2,12,12,12}$  | 0.00  | $F_{3,12,12,12}$  | 0.00  |
| $F_{4,12,12,12}$  | -0.01 | $F_{5,12,12,12}$  | -0.00 | $F_{6,12,12,12}$  | -0.01 | $F_{7,12,12,12}$  | -0.08 |
| $F_{8,12,12,12}$  | -0.37 | $F_{9,12,12,12}$  | 0.12  | $F_{10,12,12,12}$ | 0.09  | $F_{11,12,12,12}$ | 0.37  |
| $F_{12,12,12,12}$ | -0.12 |                   |       |                   |       |                   |       |

Table S24: The CcCR Vibrational Frequencies ( $\text{cm}^{-1}$ ) for the Isotopologues of HOOH

| Mode       | H <sup>18</sup> OOH | DOOH   | DOOD   | D <sup>18</sup> O <sup>18</sup> OD |
|------------|---------------------|--------|--------|------------------------------------|
| $\omega_1$ | 3805.6              | 3805.6 | 2774.7 | 2756.4                             |
| $\omega_2$ | 3792.8              | 2773.1 | 2771.3 | 2753.9                             |
| $\omega_3$ | 1438.5              | 1392.0 | 1056.3 | 1048.6                             |
| $\omega_4$ | 1329.8              | 1017.1 | 986.5  | 977.0                              |
| $\omega_5$ | 889.1               | 913.7  | 912.7  | 860.9                              |
| $\omega_6$ | 379.5               | 333.3  | 278.2  | 276.3                              |
| $\nu_1$    | 3609.7              | 3609.2 | 2670.1 | 2653.1                             |
| $\nu_2$    | 3598.1              | 2669.5 | 2668.1 | 2652.0                             |
| $\nu_3$    | 1395.2              | 1375.0 | 1030.3 | 1023.2                             |
| $\nu_4$    | 1275.6              | 986.9  | 953.1  | 945.0                              |
| $\nu_5$    | 854.0               | 879.6  | 880.9  | 832.1                              |
| $\nu_6$    | 314.2               | 282.6  | 242.7  | 241.4                              |
| ZPT        | 5717.7              | 5038.4 | 4333.5 | 4281.6                             |

**Table S25: The CcCR Geometrical Parameters and Spectroscopic Constants for the Isotopologues of HOOH**

|                                                                  | Units | H <sup>18</sup> OOH | DOOH        | DOOD         | D <sup>18</sup> O <sup>18</sup> OH |
|------------------------------------------------------------------|-------|---------------------|-------------|--------------|------------------------------------|
| R <sub>e</sub> (H <sub>1</sub> -O <sub>1</sub> )                 | Å     | 0.96198             | 0.96198     | 0.96198      | 0.96198                            |
| R <sub>e</sub> (O <sub>1</sub> -O <sub>2</sub> )                 | Å     | 1.44803             | 1.44803     | 1.44803      | 1.44803                            |
| R <sub>e</sub> (O <sub>2</sub> -H <sub>2</sub> )                 | Å     | 0.96198             | 0.96198     | 0.96198      | 0.96198                            |
| ∠ <sub>e</sub> (O <sub>1</sub> -H <sub>1</sub> -O <sub>2</sub> ) | °     | 100.15              | 100.15      | 100.15       | 100.15                             |
| ∠ <sub>e</sub> (O <sub>1</sub> -H <sub>1</sub> -H <sub>2</sub> ) | °     | 100.15              | 100.15      | 100.15       | 100.15                             |
| A <sub>e</sub>                                                   | MHz   | 303372.3            | 214618.4    | 166303.9     | 163164.1                           |
| B <sub>e</sub>                                                   | MHz   | 25260.8             | 25186.5     | 23592.5      | 21519.7                            |
| C <sub>e</sub>                                                   | MHz   | 24500.5             | 23899.2     | 22466.1      | 20550.5                            |
| R <sub>0</sub> (H <sub>1</sub> -O <sub>1</sub> )                 | Å     | 0.96232             | 0.96615     | 0.96248      | 0.96242                            |
| R <sub>0</sub> (O <sub>1</sub> -O <sub>2</sub> )                 | Å     | 1.46144             | 1.46086     | 1.46001      | 1.45955                            |
| R <sub>0</sub> (O <sub>2</sub> -H <sub>2</sub> )                 | Å     | 0.96218             | 0.95638     | 0.96248      | 0.96242                            |
| ∠ <sub>0</sub> (O <sub>1</sub> -H <sub>1</sub> -O <sub>2</sub> ) | °     | 100.06              | 99.92       | 100.02       | 100.03                             |
| ∠ <sub>0</sub> (O <sub>1</sub> -H <sub>1</sub> -H <sub>2</sub> ) | °     | 100.06              | 100.17      | 100.02       | 100.03                             |
| A <sub>0</sub>                                                   | MHz   | 300658.7            | 213127.0    | 165402.4     | 162243.3                           |
| B <sub>0</sub>                                                   | MHz   | 24975.6             | 24934.3     | 23402.6      | 21346.0                            |
| C <sub>0</sub>                                                   | MHz   | 24073.8             | 23515.9     | 22119.0      | 20244.6                            |
| A <sub>1</sub>                                                   | MHz   | 295067.1            | 210320.8    | 163191.4     | 160092.0                           |
| B <sub>1</sub>                                                   | MHz   | 24939.6             | 24886.4     | 23347.2      | 21302.0                            |
| C <sub>1</sub>                                                   | MHz   | 24071.7             | 23523.2     | 22105.1      | 20234.2                            |
| A <sub>2</sub>                                                   | MHz   | 294991.1            | 209441.7    | 163165.0     | 160048.6                           |
| B <sub>2</sub>                                                   | MHz   | 24942.3             | 24893.6     | 23342.3      | 21297.1                            |
| C <sub>2</sub>                                                   | MHz   | 24073.3             | 23477.8     | 22103.4      | 20233.1                            |
| A <sub>3</sub>                                                   | MHz   | 304196.9            | 214844.4    | 166783.4     | 163610.8                           |
| B <sub>3</sub>                                                   | MHz   | 24803.7             | 24784.5     | 23271.2      | 21229.2                            |
| C <sub>3</sub>                                                   | MHz   | 23999.5             | 23426.4     | 22167.4      | 20263.9                            |
| A <sub>4</sub>                                                   | MHz   | 304871.3            | 215974.7    | 167278.3     | 164013.5                           |
| B <sub>4</sub>                                                   | MHz   | 24910.9             | 24916.9     | 23462.9      | 21374.3                            |
| C <sub>4</sub>                                                   | MHz   | 23846.0             | 23405.7     | 21924.9      | 20076.4                            |
| A <sub>5</sub>                                                   | MHz   | 300056.7            | 212650.6    | 164940.0     | 161855.4                           |
| B <sub>5</sub>                                                   | MHz   | 24680.1             | 24646.8     | 23118.6      | 21108.9                            |
| C <sub>5</sub>                                                   | MHz   | 23773.8             | 23191.6     | 21822.2      | 19996.1                            |
| A <sub>6</sub>                                                   | MHz   | 299342.1            | 212547.0    | 165253.7     | 161998.4                           |
| B <sub>6</sub>                                                   | MHz   | 24982.7             | 24969.3     | 23473.0      | 21400.0                            |
| C <sub>6</sub>                                                   | MHz   | 23849.2             | 23308.5     | 21916.9      | 20069.3                            |
| Δ <sub>J</sub>                                                   | kHz   | 87.665              | 79.369      | 78.605       | 64.488                             |
| Δ <sub>K</sub>                                                   | MHz   | 10.882              | 6.325       | 3.696        | 3.427                              |
| Δ <sub>JK</sub>                                                  | kHz   | 1.057 (MHz)         | 921.464     | 641.912      | 566.125                            |
| δ <sub>J</sub>                                                   | Hz    | -25.078             | 1.513 (kHz) | -642.400     | -322.349                           |
| δ <sub>K</sub>                                                   | MHz   | 6.164               | 1.283       | 5.306        | 4.411                              |
| Φ <sub>j</sub>                                                   | mHz   | -7.464              | -72.613     | 158.252      | 90.267                             |
| Φ <sub>k</sub>                                                   | kHz   | 1.659               | 1.463       | 772.462 (Hz) | 586.836 (Hz)                       |
| Φ <sub>jk</sub>                                                  | Hz    | 64.402              | 226.725     | 89.392       | 62.262                             |
| Φ <sub>kj</sub>                                                  | Hz    | -175.364            | -795.880    | -417.549     | -278.660                           |
| φ <sub>j</sub>                                                   | mHz   | 894.134 (μHz)       | 85.821      | 19.711       | 13.179                             |
| φ <sub>jk</sub>                                                  | Hz    | 95.243              | -33.217     | 94.518       | 67.211                             |
| φ <sub>k</sub>                                                   | kHz   | -47.806             | 49.734      | -26.123      | -20.668                            |



**Table S26: The CcCR Vibrational Frequencies ( $\text{cm}^{-1}$ ) for the Isotopologues of HOSH**

| Mode       | H <sup>18</sup> OSH | HO <sup>34</sup> SH | DOSH   | DOSD   | H <sup>18</sup> O <sup>34</sup> SH |
|------------|---------------------|---------------------|--------|--------|------------------------------------|
| $\omega_1$ | 3812.7              | 3825.5              | 2786.5 | 2786.5 | 3812.7                             |
| $\omega_2$ | 2661.9              | 2659.5              | 2661.9 | 1912.7 | 2659.5                             |
| $\omega_3$ | 1207.5              | 1210.2              | 1032.6 | 885.6  | 1206.8                             |
| $\omega_4$ | 1030.7              | 1032.7              | 885.5  | 791.0  | 1029.8                             |
| $\omega_5$ | 757.1               | 777.9               | 783.3  | 749.6  | 748.8                              |
| $\omega_6$ | 478.2               | 479.6               | 397.1  | 350.7  | 478.0                              |
| $\nu_1$    | 3617.2              | 3628.6              | 2682.3 | 2682.1 | 3617.2                             |
| $\nu_2$    | 2546.7              | 2544.5              | 2546.2 | 1853.7 | 2544.5                             |
| $\nu_3$    | 1171.7              | 1174.1              | 1008.2 | 865.2  | 1171.0                             |
| $\nu_4$    | 1006.7              | 1008.4              | 864.5  | 774.3  | 1005.8                             |
| $\nu_5$    | 736.9               | 756.3               | 768.7  | 737.3  | 729.2                              |
| $\nu_6$    | 436.7               | 437.8               | 368.5  | 327.9  | 436.6                              |
| ZPT        | 4898.2              | 4916.4              | 4219.5 | 3696.7 | 4892.1                             |

**Table S27: The CcCR Geometrical Parameters and Spectroscopic Constants for the Isotopologues of HOSH**

|                                      | Units | H <sup>18</sup> OSH | HO <sup>34</sup> SH | DOSH        | DOSD        | H <sup>18</sup> O <sup>34</sup> SH |
|--------------------------------------|-------|---------------------|---------------------|-------------|-------------|------------------------------------|
| R <sub>e</sub> (H <sub>1</sub> -O)   | Å     | 0.96012             | 0.96012             | 0.9601      | 0.96012     | 0.96012                            |
| R <sub>e</sub> (O-S)                 | Å     | 1.66051             | 1.66051             | 1.6605      | 1.66051     | 1.66051                            |
| R <sub>e</sub> (S-H <sub>2</sub> )   | Å     | 1.34273             | 1.34273             | 1.3427      | 1.34273     | 1.34273                            |
| ∠ <sub>e</sub> (O-H <sub>1</sub> -S) | °     | 107.21              | 107.21              | 107.2       | 107.21      | 107.21                             |
| ∠ <sub>e</sub> (S-O-H <sub>2</sub> ) | °     | 98.45               | 98.45               | 98.4        | 98.45       | 98.45                              |
| A <sub>e</sub>                       | MHz   | 202735.5            | 203009.3            | 160886.3    | 107317.0    | 202408.2                           |
| B <sub>e</sub>                       | MHz   | 14405.9             | 15134.4             | 14256.6     | 13970.6     | 14120.2                            |
| C <sub>e</sub>                       | MHz   | 14037.2             | 14723.1             | 14147.5     | 13294.0     | 13764.1                            |
| R <sub>0</sub> (H <sub>1</sub> -O)   | Å     | 0.95807             | 0.95803             | 0.96175     | 0.95875     | 0.95805                            |
| R <sub>0</sub> (O-S)                 | Å     | 1.66903             | 1.66919             | 1.66873     | 1.66840     | 1.66897                            |
| R <sub>0</sub> (S-H <sub>2</sub> )   | Å     | 1.35220             | 1.35226             | 1.34914     | 1.34992     | 1.35219                            |
| ∠ <sub>0</sub> (O-H <sub>1</sub> -S) | °     | 107.51              | 107.51              | 107.32      | 107.40      | 107.51                             |
| ∠ <sub>0</sub> (S-O-H <sub>2</sub> ) | °     | 98.51               | 98.51               | 98.56       | 98.46       | 98.51                              |
| A <sub>0</sub>                       | MHz   | 201383.8            | 201658.1            | 159997.7    | 106836.0    | 201056.8                           |
| B <sub>0</sub>                       | MHz   | 14295.3             | 15016.5             | 14139.0     | 13879.6     | 14012.2                            |
| C <sub>0</sub>                       | MHz   | 13913.7             | 14591.1             | 14044.4     | 13187.5     | 13643.8                            |
| A <sub>1</sub>                       | MHz   | 198955.8            | 199241.9            | 157995.9    | 105943.8    | 198636.4                           |
| B <sub>1</sub>                       | MHz   | 14274.3             | 14992.7             | 14108.6     | 13850.0     | 13991.9                            |
| C <sub>1</sub>                       | MHz   | 13904.2             | 14580.0             | 14028.1     | 13172.6     | 13634.6                            |
| A <sub>2</sub>                       | MHz   | 197367.4            | 197622.3            | 157472.0    | 105310.3    | 197044.2                           |
| B <sub>2</sub>                       | MHz   | 14313.0             | 15035.3             | 14155.4     | 13886.0     | 14029.9                            |
| C <sub>2</sub>                       | MHz   | 13914.3             | 14590.9             | 14044.0     | 13173.5     | 13645.0                            |
| A <sub>3</sub>                       | MHz   | 204379.6            | 204672.2            | 161452.2    | 108096.8    | 204043.2                           |
| B <sub>3</sub>                       | MHz   | 14256.7             | 14975.4             | 14126.0     | 13855.6     | 13974.5                            |
| C <sub>3</sub>                       | MHz   | 13913.3             | 14591.7             | 13988.6     | 13200.4     | 13642.9                            |
| A <sub>4</sub>                       | MHz   | 203693.4            | 203968.7            | 162636.1    | 106801.3    | 203356.3                           |
| B <sub>4</sub>                       | MHz   | 14280.5             | 15002.3             | 14113.6     | 13768.9     | 13997.2                            |
| C <sub>4</sub>                       | MHz   | 13854.7             | 14529.8             | 14059.9     | 13146.7     | 13586.1                            |
| A <sub>5</sub>                       | MHz   | 201193.8            | 201463.2            | 159727.0    | 107600.3    | 200869.8                           |
| B <sub>5</sub>                       | MHz   | 14176.4             | 14889.1             | 14012.9     | 13876.9     | 13897.0                            |
| C <sub>5</sub>                       | MHz   | 13797.4             | 14465.2             | 13925.1     | 13075.6     | 13531.0                            |
| A <sub>6</sub>                       | MHz   | 200009.2            | 200278.2            | 158925.6    | 106301.8    | 199688.2                           |
| B <sub>6</sub>                       | MHz   | 14252.8             | 14972.3             | 14101.0     | 13860.6     | 13970.2                            |
| C <sub>6</sub>                       | MHz   | 13848.2             | 14521.7             | 13996.2     | 13140.4     | 13579.6                            |
| Δ <sub>J</sub>                       | kHz   | 20.814              | 22.740              | 19.434      | 17.060      | 20.059                             |
| Δ <sub>K</sub>                       | MHz   | 5.472               | 5.474               | 3.848       | 1.514       | 5.453                              |
| Δ <sub>JK</sub>                      | kHz   | 345.443             | 373.986             | 291.004     | 254.383     | 334.341                            |
| δ <sub>J</sub>                       | Hz    | 562.175             | 645.367             | 154.134     | 828.194     | 532.699                            |
| δ <sub>K</sub>                       | MHz   | -0.739              | -0.790              | -4.578      | -0.567      | -0.707                             |
| Φ <sub>j</sub>                       | mHz   | -11.755             | -13.644             | -9.287      | -6.770      | -11.073                            |
| Φ <sub>k</sub>                       | Hz    | 431.584             | 429.231             | 409.595     | 64.083      | 427.003                            |
| Φ <sub>jk</sub>                      | Hz    | -7.034              | -8.407              | -10.995     | -9.819      | -6.485                             |
| Φ <sub>kj</sub>                      | Hz    | 49.217              | 55.355              | 40.910      | 37.261      | 46.653                             |
| φ <sub>j</sub>                       | μHz   | 387.635             | 378.666             | -26.850     | 203.398     | 359.204                            |
| φ <sub>jk</sub>                      | mHz   | -428.852            | -624.312            | -8.519 (Hz) | -1.905 (Hz) | -364.575                           |
| φ <sub>k</sub>                       | kHz   | -7.280              | -7.642              | -400.589    | -2.523      | -6.946                             |

**Table S28: The CcCR Vibrational Frequencies ( $\text{cm}^{-1}$ ) for the Isotopologues of HSSH**

| Mode       | H <sup>34</sup> SSH | DSSH   | DSSD   | D <sup>34</sup> S <sup>34</sup> SD |
|------------|---------------------|--------|--------|------------------------------------|
| $\omega_1$ | 2682.4              | 2681.8 | 1927.4 | 1923.9                             |
| $\omega_2$ | 2678.8              | 1926.5 | 1925.6 | 1922.2                             |
| $\omega_3$ | 907.8               | 907.5  | 660.3  | 658.1                              |
| $\omega_4$ | 906.6               | 656.1  | 651.3  | 650.2                              |
| $\omega_5$ | 522.1               | 529.7  | 529.5  | 513.7                              |
| $\omega_6$ | 443.4               | 386.8  | 319.8  | 319.1                              |
| $\nu_1$    | 2568.9              | 2567.3 | 1869.0 | 1865.7                             |
| $\nu_2$    | 2564.8              | 1868.3 | 1866.8 | 1863.5                             |
| $\nu_3$    | 886.8               | 884.5  | 647.6  | 645.6                              |
| $\nu_4$    | 883.4               | 642.4  | 646.4  | 645.0                              |
| $\nu_5$    | 510.6               | 518.8  | 519.0  | 503.9                              |
| $\nu_6$    | 405.6               | 357.7  | 299.7  | 299.1                              |
| ZPT        | 4014.4              | 3500.9 | 2977.1 | 2964.0                             |

**Table S29: The CcCR Geometrical Parameters and Spectroscopic Constants for the Isotopologues of HSSH**

|                                                                  | Units | H <sup>34</sup> SSH | DSSH           | DSSD           | D <sup>34</sup> S <sup>34</sup> SH |
|------------------------------------------------------------------|-------|---------------------|----------------|----------------|------------------------------------|
| R <sub>e</sub> (H <sub>1</sub> -S <sub>1</sub> )                 | Å     | 1.34066             | 1.34066        | 1.34066        | 1.34066                            |
| R <sub>e</sub> (S <sub>1</sub> -S <sub>2</sub> )                 | Å     | 2.05016             | 2.05016        | 2.05016        | 2.05016                            |
| R <sub>e</sub> (S <sub>2</sub> -H <sub>2</sub> )                 | Å     | 2.60447             | 2.60447        | 2.60447        | 2.60447                            |
| ∠ <sub>e</sub> (S <sub>1</sub> -H <sub>1</sub> -S <sub>2</sub> ) | °     | 98.19               | 98.19          | 98.19          | 98.19                              |
| ∠ <sub>e</sub> (S <sub>1</sub> -H <sub>1</sub> -H <sub>2</sub> ) | °     | 97.36               | 97.36          | 97.36          | 97.36                              |
| ∠ <sub>e</sub> (S <sub>1</sub> -S <sub>2</sub> -H <sub>1</sub> ) | °     | 30.63               | 30.63          | 30.63          | 30.63                              |
| A <sub>e</sub>                                                   | MHz   | 147710.1            | 101104.7       | 76807.7        | 76473.5                            |
| B <sub>e</sub>                                                   | MHz   | 6830.8              | 6872.4         | 6586.1         | 6244.7                             |
| C <sub>e</sub>                                                   | MHz   | 6829.3              | 6727.6         | 6584.3         | 6243.8                             |
| R <sub>0</sub> (H <sub>1</sub> -S <sub>1</sub> )                 | Å     | 1.34588             | 1.34676        | 1.34457        | 1.34454                            |
| R <sub>0</sub> (S <sub>1</sub> -S <sub>2</sub> )                 | Å     | 2.05876             | 2.05830        | 2.05772        | 2.05758                            |
| R <sub>0</sub> (S <sub>2</sub> -H <sub>2</sub> )                 | Å     | 2.61586             | 2.61411        | 2.61355        | 2.61345                            |
| ∠ <sub>0</sub> (S <sub>1</sub> -H <sub>1</sub> -S <sub>2</sub> ) | °     | 98.23               | 98.15          | 98.19          | 98.20                              |
| ∠ <sub>0</sub> (S <sub>1</sub> -H <sub>1</sub> -H <sub>2</sub> ) | °     | 97.46               | 97.39          | 97.43          | 97.43                              |
| ∠ <sub>0</sub> (S <sub>1</sub> -S <sub>2</sub> -H <sub>1</sub> ) | °     | 30.61               | 30.54          | 30.61          | 30.61                              |
| A <sub>0</sub>                                                   | MHz   | 146591.3            | 100493.2       | 76402.5        | 76069.3                            |
| B <sub>0</sub>                                                   | MHz   | 6811.4              | 6831.0         | 6591.1         | 6264.8                             |
| C <sub>0</sub>                                                   | MHz   | 6754.2              | 6683.0         | 6503.6         | 6152.8                             |
| A <sub>1</sub>                                                   | MHz   | 144529.4            | 99522.0        | 75650.1        | 75319.7                            |
| B <sub>1</sub>                                                   | MHz   | 6816.8              | 6835.0         | 6592.5         | 6266.4                             |
| C <sub>1</sub>                                                   | MHz   | 6760.9              | 6690.7         | 6503.9         | 6153.4                             |
| A <sub>2</sub>                                                   | MHz   | 144479.6            | 99162.5        | 75621.4        | 75291.9                            |
| B <sub>2</sub>                                                   | MHz   | 6818.0              | 6834.9         | 6592.9         | 6266.8                             |
| C <sub>2</sub>                                                   | MHz   | 6760.8              | 6681.5         | 6504.2         | 6153.7                             |
| A <sub>3</sub>                                                   | MHz   | 148835.0            | 101151.1       | 77173.2        | 76830.5                            |
| B <sub>3</sub>                                                   | MHz   | 6797.9              | 6805.8         | 6575.2         | 6249.8                             |
| C <sub>3</sub>                                                   | MHz   | 6741.2              | 6671.9         | 6499.0         | 6147.8                             |
| A <sub>4</sub>                                                   | MHz   | 147207.7            | 101469.1       | 76743.4        | 76408.6                            |
| B <sub>4</sub>                                                   | MHz   | 6786.7              | 6829.8         | 6589.6         | 6262.3                             |
| C <sub>4</sub>                                                   | MHz   | 6731.1              | 6665.1         | 6487.9         | 6137.8                             |
| A <sub>5</sub>                                                   | MHz   | 146523.7            | 100439.3       | 76357.8        | 76027.6                            |
| B <sub>5</sub>                                                   | MHz   | 6772.1              | 6791.5         | 6552.0         | 6229.1                             |
| C <sub>5</sub>                                                   | MHz   | 6715.9              | 6642.9         | 6464.7         | 6117.1                             |
| A <sub>6</sub>                                                   | MHz   | 145735.0            | 99992.6        | 76058.4        | 75729.4                            |
| B <sub>6</sub>                                                   | MHz   | 6783.7              | 6807.1         | 6567.4         | 6242.3                             |
| C <sub>6</sub>                                                   | MHz   | 6720.2              | 6655.6         | 6487.2         | 6137.0                             |
| Δ <sub>J</sub>                                                   | kHz   | 5.058               | 4.736          | 4.529          | 4.079                              |
| Δ <sub>K</sub>                                                   | MHz   | 2.264               | 1.177          | 0.602          | 0.598                              |
| Δ <sub>JK</sub>                                                  | kHz   | 81.461              | 79.432         | 62.643         | 57.252                             |
| δ <sub>J</sub>                                                   | Hz    | -7.487              | 97.988         | 16.875         | 13.766                             |
| δ <sub>K</sub>                                                   | MHz   | 13.766              | -0.153         | 21.741         | 27.986                             |
| Φ <sub>j</sub>                                                   | mHz   | -1.117              | -1.297         | -723.733 (μHz) | -672.823 (μHz)                     |
| Φ <sub>k</sub>                                                   | kHz   | 1.515               | 39.617         | -11.978 (Hz)   | -17.027 (Hz)                       |
| Φ <sub>jk</sub>                                                  | Hz    | 610.693             | -517.843 (mHz) | -11.773        | -13.693                            |
| Φ <sub>kj</sub>                                                  | kHz   | -2.032              | 3.581 (Hz)     | 40.319 (Hz)    | 46.657 (Hz)                        |
| φ <sub>j</sub>                                                   | μHz   | 4.575               | 29.504         | -13.924        | -11.863 (μHz)                      |
| φ <sub>jk</sub>                                                  | Hz    | 283.132             | 38.949 (mHz)   | -821.738       | -1.391 (kHz)                       |
| φ <sub>k</sub>                                                   | GHz   | -0.180              | -762.307 (Hz)  | -0.570         | -1.489                             |
